# Supplementary material for: Ring expansion of cyclic 1,2-diols to form medium sized rings via ruthenium catalyzed transfer hydrogenative [4+2] cycloaddition
Source: Royal Society of Chemistry journal article supplement (doi:10.1039/c4cc03983a), 2014-01-01

## Supporting Information

### **Ring Expansion of Cyclic 1,2-Diols to form Medium Sized Rings *via* Ruthenium Catalyzed Transfer Hydrogenative [4+2] Cycloaddition**

Zachary A. Kasun, Liana M. Geary, and Michael J. Krische

*University of Texas at Austin, Department of Chemistry and Biochemistry*

*Austin, TX 78712*

*mkrische@mail.utexas.edu*

| <b>Table of Contents</b>                                                 | <b>pg</b> |
|--------------------------------------------------------------------------|-----------|
| General Information                                                      | S2        |
| Spectroscopy and Spectrometry                                            | S2        |
| Synthesis of Starting Materials                                          | S3        |
| Preparation and Spectroscopic Data of Cycloadduct-1,2-Diols <b>3a-3r</b> | S7        |
| Preparation and Spectroscopic Data for 1,6 -Diones <b>4a-4r</b>          | S50       |

**General Information:** All reactions were run under an atmosphere of argon. Anhydrous solvents were distilled using solvent stills, and solvents were transferred by syringe. Sealed tubes (13×100 mm<sup>2</sup>) were purchased from Fisher Scientific (catalog number 14-959-35C) and were dried in an oven overnight and cooled under a stream of argon prior to use. Ru<sub>3</sub>(CO)<sub>12</sub>, racemic 2,2'-bis(diphenylphosphino)-1,1'-binaphthyl (*rac*-BINAP) and 1,3-bis(diphenylphosphino)-propane (dppp) were used without purification. All commercially available starting materials were used without purification, except *trans*-1,2-cyclohexanediol, which was recrystallized from boiling ethyl acetate, and isoprene, which was distilled, before use. Analytical thin-layer chromatography (TLC) was carried out using 0.25 mm commercial silica gel plates (Silicycle Siliaplate, F-254). Visualization was accomplished by dipping in a *p*-anisaldehyde solution and heating. Purification of reaction products was carried out by flash column chromatography using Silicycle silica gel (40-63 μm), according to the method described by Still.<sup>1</sup>

**Spectroscopy and Spectrometry:** Infrared spectra were recorded on a Thermo Nicolet 380 spectrometer. Low-resolution mass spectra (LRMS) were obtained on a Thermo Scientific TSQ for chemical ionization (CI) or an Agilent Technologies 6530 Accurate Mass QToF/MS for electrospray ionization (ESI) and are reported as *m/z* (relative intensity). Accurate masses are reported for the molecular ion (M+H or M+Na) or a suitable fragment ion. Melting points were obtained on a Stuart SMP3 apparatus and are uncorrected. <sup>1</sup>H NMR spectra were recorded on a Varian DirectDrive (400 MHz) or Agilent MR (400 MHz) spectrometer at ambient temperature unless otherwise noted. Chemical shifts are reported in delta (δ) units, parts per million (ppm), relative to the center of the singlet at 7.26 ppm for deuteriochloroform. Data are reported as: multiplicity (s = singlet, d = doublet, t = triplet, q = quartet, quin. = quintet, m = multiplet), integration and coupling constant(s) in Hz. <sup>13</sup>C NMR spectra were recorded on a Varian DirectDrive (100 MHz) or Agilent MR (100 MHz) spectrometer and were routinely run with broadband decoupling. Chemical shifts are reported in ppm, with the residual solvent resonance employed as the internal standard (CDCl<sub>3</sub> at 77.16 ppm).

---

<sup>1</sup> Still, W.C.; Kahn, M.; Mitra, A. *J. Org. Chem.* **1978**, *43*, 2923.

## Synthesis of starting materials

### *trans*-1,2-heptanediol (**1c**)

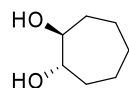

To a round bottom flask charged with cycloheptene (1.5 mL, 12.85 mmol) was added a solution of H<sub>2</sub>O<sub>2</sub> (30% w/w in H<sub>2</sub>O, 14.5 mL) and formic acid (88% w/w in H<sub>2</sub>O, 65 mL). The resulting solution was heated at 50 °C for 1 hour, was cooled to ambient temperature, and was allowed to stir overnight. The mixture was subjected to rotary evaporation under reduced pressure. To the residue was added NaOH (aq.) (10.0 M) until the solution was basic. The resulting mixture was extracted four times with ethyl acetate. The combined organic layers were dried (Na<sub>2</sub>SO<sub>4</sub>), filtered, and subjected to rotary evaporation under reduced pressure to afford a colorless solid (1.0 g, 7.6 mmol, 60% yield). <sup>1</sup>H NMR spectrum **1c** was identical in all respects to literature material.<sup>2</sup>

**<sup>1</sup>H NMR (400 MHz, CDCl<sub>3</sub>):** δ 3.44-3.40 (2H, m), 2.91 (2H, s), 1.91-1.83 (2H, m), 1.70-1.63 (2H, m), 1.56-1.44 (6H, m) ppm.

### (3*R*\*,4*S*\*)-tetrahydrofuran-3,4-diol (**1e**)

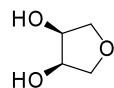

To a round bottom flask charged with *meso*-erythritol (17.3 g, 14.2 mmol, 100 mol%) was added *p*-toluenesulfonic acid hydrate (1.35 g, 7.1 mmol, 5 mol%). The flask was fitted to a high vacuum distillation apparatus. The mixture was heated to 175 °C under vacuum. The diol was distilled (1.3 g, 12 mmol, 88% yield). <sup>1</sup>H and <sup>13</sup>C NMR spectrum **1e** was identical in all respects to literature material.<sup>3</sup>

**TLC (SiO<sub>2</sub>):** 0.02 (1:1, hexanes: ethyl acetate).

**<sup>1</sup>H NMR (400 MHz, CD<sub>3</sub>CN):** δ 4.13 (m, 2H), 3.81 (m, 2H), 3.62 (br s, 2H), 3.54 (m, 2H) ppm.

**<sup>1</sup>H NMR (400 MHz, CDCl<sub>3</sub>):** δ 4.27 (m, 2H), 3.92 (m, 2H), 3.73 (m, 2H), 2.92 (br s, 2H) ppm.

**<sup>13</sup>C NMR (100 MHz, CD<sub>3</sub>CN):** δ 71.9, 69.1 ppm.

<sup>2</sup> Daiichi Pharmaceutical Co., Ltd. Antithrombic Diaminocyclohexane Derivatives. European Patent EP1577301 A1, Sep 21, 2005.

<sup>3</sup> Arceo, E; Marsden, P.; Bergman, R. G; Ellman, J. A. *Chem. Commun.* **2009**, 3357.

**(2*R*,3*S*,3*R*)-2-(((*tert*-Butyldimethylsilyl)oxy)methyl)tetrahydro-2*H*-pyran-3,4-diol (**1f**)**

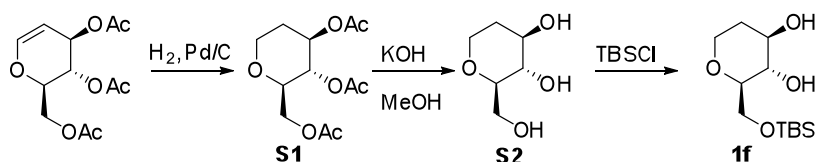

To a round bottom flask charged with tri-*O*-acetyl-D-glucal (4.00 g, 14.7 mmol, 100 mol%) and palladium on carbon (0.40 g, 10 mass%) was added ethyl acetate (12 mL, 1.2 M). The solution was sparged with nitrogen and a hydrogen balloon was attached to the flask. The reaction was allowed to stir at ambient temperature for 16 hours, at which point the reaction was filtered through celite with the aid of ethyl acetate. The reaction mixture was subjected to rotary evaporation under reduced pressure to give crude **S1** (4.01 g, 14.7 mmol, 99% yield). The  $^1\text{H}$  NMR spectrum of **S1** was identical in all respects to literature material.<sup>4</sup>

**$^1\text{H}$  NMR (400 MHz,  $\text{CDCl}_3$ ):**  $\delta$  5.00-4.91 (m, 2H), 4.26-4.18 (m, 1H), 4.13-3.98 (m, 3H), 3.54-3.44 (m, 2H), 2.11-2.03 (m, 1H), 2.08 (s, 3H), 2.03 (s, 3H), 2.02 (s, 3H), 1.87-1.74 (m, 1H), 1.27-1.21 (m, 1H) ppm.

To a round bottom flask charged with crude **S1** (4.01 g, 14.7 mmol, 100 mol%) was added methanol (60 mL, 0.25 M). KOH (aq.) (10% w/w in  $\text{H}_2\text{O}$ , 40 mL) was added, and the reaction mixture was allowed to stir at ambient temperature for 16 hours. To the reaction mixture was added HCl (aq.) (2.0 M) until the solution was neutral. The volatiles were subjected to rotary evaporation under reduced pressure. The resulting solid was suspended in ethanol, filtered, and the volatiles were removed *in vacuo* to give crude **S2** (2.18 g, 14.7 mmol, 99% yield). The  $^1\text{H}$  NMR spectrum of **S2** was identical in all respects to literature material.<sup>4</sup>

**$^1\text{H}$  NMR (400 MHz,  $\text{CDCl}_3$ ):**  $\delta$  3.98 (dd, 1H,  $J = 1.9, 5.2$ ), 3.90-3.78 (m, 2H), 3.69-3.62 (m, 2H), 3.50 (dt,  $J = 1.9, 12$  Hz, 1H), 3.24-3.19 (m, 1H), 2.01-1.94 (m, 1H), 1.75-1.63 (m, 2H) ppm.

<sup>4</sup> Shigetomi, K.; Shoji, K.; Mitsunashi, S.; Ubukata, M. *Phytochemistry* **2010**, 71, 312.



To a round bottom flask charged with crude triol **S2** (2.12 g, 14.7 mmol, 100 mol%) was added *N,N*-dimethylformamide (50 mL, 0.3M). Imidazole (2.00 g, 29.4 mmol, 200 mol%) and chlorodimethyl-*tert*butylsilane (2.43 g, 16.17 mmol, 110 mol%) were added to the solution. The solution was allowed to stir at ambient temperature for 12 hours. To the reaction was added water (100 mL), and the resulting solution was extracted three times with dichloromethane. The organic layers were combined and washed three times with water, and once with brine. The organic layer was dried (Na<sub>2</sub>SO<sub>4</sub>), filtered, and the volatiles were subjected to rotary evaporation under reduced pressure. The residue was subjected to flash column chromatography (SiO<sub>2</sub>, 1:24 methanol: dichloromethane) to give **1f** (2.7g, 10.3 mmol, 70% yield) as a solid. The <sup>1</sup>H NMR spectrum of **1f** was identical in all respects to literature material<sup>5</sup>

**<sup>1</sup>H NMR (400 MHz, CDCl<sub>3</sub>):** δ 3.96-3.91 (m, 2H), 3.73 (dd, 1H, *J* = 7, 10 Hz), 3.70-3.63 (m, 1H), 3.47 (dd, 1H, *J* = 1.8, 12 Hz), 3.43 (t, 1H, *J* = 9 Hz), 3.24-3.17 (m, 1H), 2.04-1.58 (br s, 2H), 1.96-1.90 (m, 1H), 1.73-1.62 (m, 1H), 0.90 (s, 9H), 0.11 (s, 3H), 0.10 (s, 3H) ppm.

**<sup>13</sup>C NMR (100 MHz, CDCl<sub>3</sub>):** δ 77.8, 76.0, 72.9, 65.6, 65.5, 32.7, 25.8, 18.2, -5.53, -5.55 ppm.

**(4a*R*,6*S*,7*R*,8*R*,8a*S*)-6-methoxy-2,2-dimethylhexahydropyrano[3,2-*d*][1,3]dioxine-7,8-diol (**1g**)**

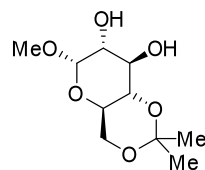

To a round bottom flask charged with α-methyl glucopyranoside (1.50 g, 7.72 mmol, 100 mol%) and *p*-toluenesulfonic acid hydrate (0.15 g, 0.77 mmol, 10 mol%) was added acetone (15 mL, 0.77M). A reflux condenser was fitted to the flask. Dimethoxypropane (1.5 mL, 11.58 mmol, 150 mol%) was added. *N,N*-dimethylformamide was added until the reaction became homogeneous (approximately 2 mL). The reaction mixture was refluxed for 15 hours, and it was cooled to ambient temperature. Triethylamine was added, and the mixture was filtered through celite with the aid of acetone. The volatiles were subjected to rotary evaporation under reduced pressure. The residue was subjected to flash column chromatography (SiO<sub>2</sub>, 1:20, methanol: dichloromethane) to give **1g** as a colorless solid (0.84 g, 3.55 mmol, 46% yield). The <sup>1</sup>H NMR spectrum of **1g** was identical in all respects to literature material.<sup>6</sup>

**<sup>1</sup>H NMR (400 MHz, CDCl<sub>3</sub>):** δ 4.72 (m, 1H), 3.87-3.67 (m, 4H), 3.63-3.45 (m, 3H), 3.40 (s, 3H), 1.48 (s, 3H), 1.41 (s, 3H).

**<sup>13</sup>C NMR (100 MHz, CDCl<sub>3</sub>):** δ 100.0, 99.9, 73.7, 73.2, 72.1, 63.5, 62.5, 55.6, 29.3, 19.3.

<sup>5</sup> Kanai, M.; Hamashima, Y.; Shibasaki, M. *Tetrahedron Lett.* **2000**, *41*, 2405.

<sup>6</sup> Khan, A. T.; Khan, M. M.; Adhikary, A. *Carbohydrate Research* **2011**, *346*, 673.

**(1S\*,2S\*,4S\*,5S\*)-cyclohexane-1,2,4,5-tetraol (1h)**

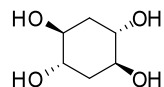

To a round bottom flask charged with a stirred solution of selenium dioxide (5.6 mg, 0.63 mmol, 2.5 mol%) in *tert*-butanol (7.5 mL, 0.08M) was added 1,4- cyclohexadiene (2.00 g, 25 mmol, 100 mol%). To the resulting mixture H<sub>2</sub>O<sub>2</sub> (30% w/w in H<sub>2</sub>O, 5.60 g, 50 mmol) was added dropwise over 20 min at room temperature. The mixture was allowed to stir for 24 hours at room temperature. NaHSO<sub>3</sub> (500 mg) was added to quench possibly unreacted H<sub>2</sub>O<sub>2</sub>. The solid precipitate was filtered and washed with ethanol. The volatiles were subjected to rotary evaporation under reduced pressure to give a syrup. The residue was dissolved in hot ethanol (50 mL), and the mixture was filtered and subjected to rotary evaporation under reduced pressure to give tetraol **1d**. Tetraol **1d** was further purified by recrystallizing from ethanol to give a colorless solid in 54% yield (1.89 g, 12.9 mmol). The <sup>1</sup>H NMR spectrum of **1d** was identical in all respects to literature material.<sup>7</sup>

**<sup>1</sup>H NMR (400 MHz, D<sub>2</sub>O):** δ 3.76 (m, 4H), 1.84 (m, 4H) ppm.

**<sup>13</sup>C NMR (100 MHz, D<sub>2</sub>O):** δ 74.4, 38.3 ppm.

---

<sup>7</sup> Maras, A.; Erden, M.; Secen, H.; Sutbeyaz, Y. *Carbohydrate Research* **1998**, 308, 435.

### Preparation of cycloadduct-1,2-diols (3b, 3d-f, 3h, 3k):

Notwithstanding variation of ligand, the cycloadducts 3b, 3d-f, 3h, 3k were prepared using our previously described method.<sup>8</sup> The <sup>1</sup>H and <sup>13</sup>C NMR spectra are identical with those previously reported.

**GENERAL PROCEDURE:** To an oven dried pressure tube equipped with a stir bar and sealed with a septum under argon was added *diol* (0.3 mmol, 100 mol%), Ru<sub>3</sub>(CO)<sub>12</sub> (3.8 mg, 0.006 mmol, 2 mol%), and a suitable ligand (0.018 mmol, 6 mol%). The vessel was purged with argon, and toluene (0.15 mL, 2.0 M) was added via syringe. Diene (0.9- 1.5 mmol, 300-500 mol%) was added via syringe. The reaction vessel was capped, and the reaction stirred at 130 °C for 48 hours. The volatiles were removed via rotary evaporation under reduced pressure, and the residue was subjected to flash column chromatography.

#### (3a*R*\*,7a*S*\*)-5-methyl-2,3,4,7-tetrahydro-1*H*-indene-3a,7a-diol (3b)

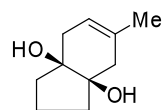

**<sup>1</sup>H NMR (400 MHz, CDCl<sub>3</sub>):** δ 5.26-5.23 (m, 1H), 2.31-2.09 (m, 6H), 1.90-1.54 (m, 10H) ppm.

**<sup>13</sup>C NMR (100 MHz, CDCl<sub>3</sub>):** δ 131.2, 117.7, 78.7, 78.0, 40.1, 35.5, 35.1, 34.8, 23.1, 17.4 ppm.

#### (4a*R*\*,8a*S*\*)-1,2,3,4,5,8-hexahydronaphthalene-4a,8a-diol (3d)

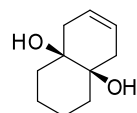

**<sup>1</sup>H NMR (400 MHz, CDCl<sub>3</sub>):** δ 5.55 (m, 2H), 2.38-2.16 (m, 6H), 1.66-1.56 (m, 4H), 1.52-1.34 (m, 4H) ppm.

**<sup>13</sup>C NMR (100 MHz, CDCl<sub>3</sub>):** δ 123.8, 72.3, 36.6, 34.0, 22.0 ppm.

<sup>8</sup> Geary, L. M.; Glasspoole, B. W.; Kim, M. M.; Krische, M. J. *J. Am. Chem. Soc.* **2012**, *135*, 3796.

**(4a*R*\*,8a*S*\*)-6-methyl-1,2,3,4,5,8-hexahydronaphthalene-4a,8a-diol (3e)**

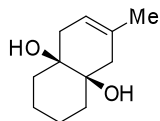

**<sup>1</sup>H NMR (400 MHz, CDCl<sub>3</sub>):** δ 5.27-5.23 (m, 1H), 2.34-2.03 (m, 6H), 1.71-1.61 (m, 7H), 1.51-1.37 (m, 4H) ppm.

**<sup>13</sup>C NMR (100 MHz, CDCl<sub>3</sub>):** δ 131.0, 117.6, 72.5, 72.0, 41.5, 36.6, 34.0, 33.8, 23.1, 21.99, 21.96 ppm.

**(4a*R*\*,8a*S*\*)-6-(4-methylpent-3-en-1-yl)-1,2,3,4,5,8-hexahydronaphthalene-4a,8a-diol (3f)**

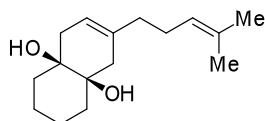

**<sup>1</sup>H NMR (400 MHz, CDCl<sub>3</sub>):** δ 5.27 (m, 1H), 5.09-5.03 (m, 1H), 2.34-1.92 (m, 10H), 1.73-1.62 (m, 7H), 1.60 (s, 3H), 1.49-1.36 (m, 4H) ppm.

**<sup>13</sup>C NMR (100 MHz, CDCl<sub>3</sub>):** δ 134.7, 131.6, 124.0, 117.3, 72.6, 72.1, 39.7, 36.9, 36.7, 33.9, 33.7, 26.2, 25.7, 22.0, 21.9, 17.7 ppm.

**(4a*S*\*,9a*R*\*)-2-methyl-1,4,6,7,8,9-hexahydro-4a*H*-benzo[7]annulene-4a,9a(5*H*)-diol (3h)**

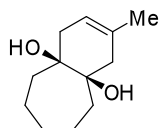

**<sup>1</sup>H NMR (400 MHz, CDCl<sub>3</sub>):** δ 5.27 (s, 1H), 2.29-2.06 (m, 6H), 1.97-1.89 (m, 2H), 1.75-1.71 (m, 3H), 1.66 (s, 3H), 1.55-1.45 (m, 5H) ppm.

**<sup>13</sup>C NMR (100 MHz, CDCl<sub>3</sub>):** δ 131.6, 118.1, 75.4, 74.9, 43.1, 38.3, 35.9, 35.7, 26.2, 23.1, 20.9 ppm.

**(4a*S*\*,10a*R*\*)-2-methyl-1,4,5,6,7,8,9,10-octahydrobenzo[8]annulene-4a,10a-diol (3k)**

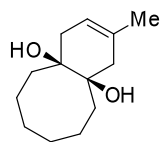

**<sup>1</sup>H NMR (400 MHz, CDCl<sub>3</sub>):** δ 5.29-2.25 (m, 1H), 2.32-2.04 (m, 6H), 1.98-1.90 (m, 2H), 1.86-1.75, (m, 2H), 1.69-1.41 (m, 12H) ppm.

**<sup>13</sup>C NMR (100 MHz, CDCl<sub>3</sub>):** δ 131.6, 118.1, 75.1, 74.6, 44.8, 40.0, 35.82, 35.75, 28.0, 23.1 ppm.

**(3aR\*,7aS\*)-2,3,4,7-tetrahydro-1H-indene-3a,7a-diol (3a)**

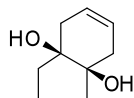

To an oven dried pressure tube equipped with a stir bar and sealed with a septum under argon was added *cis*-1,2-cyclopentanediol **1a** (30.6 mg, 0.3 mmol, 100 mol%),  $\text{Ru}_3(\text{CO})_{12}$  (3.8 mg, 0.006 mmol, 2 mol%), 3,5-dimethylbenzoic acid (4.5 mg, 0.03 mmol, 10 mol%), and dppp (7.4 mg, 0.018 mmol, 6 mol%). The vessel was purged with argon, and toluene (0.15 mL, 2.0 M) was added via syringe. Freshly condensed butadiene **2c** (0.13 mL, 1.5 mmol, 500 mol%) was added at -78 °C via syringe. The septum was replaced with a screw cap, and the reaction was heated to 130 °C. The reaction was allowed to stir for 7 hours. The volatiles were removed via rotary evaporation under reduced pressure, and the residue was subjected to flash column chromatography ( $\text{SiO}_2$ : 2:3- 3:2, ethyl acetate: hexanes) to furnish cycloadduct **3a** (37.5 mg, 0.243 mmol, 81% yield) as a colorless solid.

**TLC ( $\text{SiO}_2$ ):** Rf = 0.15 (2:3, ethyl acetate: hexanes).

**$^1\text{H}$  NMR (400 MHz,  $\text{CDCl}_3$ ):**  $\delta$  5.55 (t,  $J$  = 1.4 Hz, 2H), 2.51 (s, 2H), 2.35-2.21 (m, 4H), 1.90-1.55 (m, 6H) ppm.

**$^{13}\text{C}$  NMR (100 MHz,  $\text{CDCl}_3$ ):**  $\delta$  124.0, 78.4, 35.4, 35.1, 17.5 ppm.

**MP:** 54-56 °C.

**LRMS (ESI+):** Calculated for  $\text{C}_9\text{H}_{14}\text{NaO}_2^+$  ( $\text{M}+\text{Na}^+$ ) 177.1; Found 177.1.

**FTIR (neat):**  $\nu$  3311, 3022, 2944, 2906, 1425, 1393, 1232, 1203, 1121, 1106, 1045, 993, 951, 923, 895, 849, 665  $\text{cm}^{-1}$ .

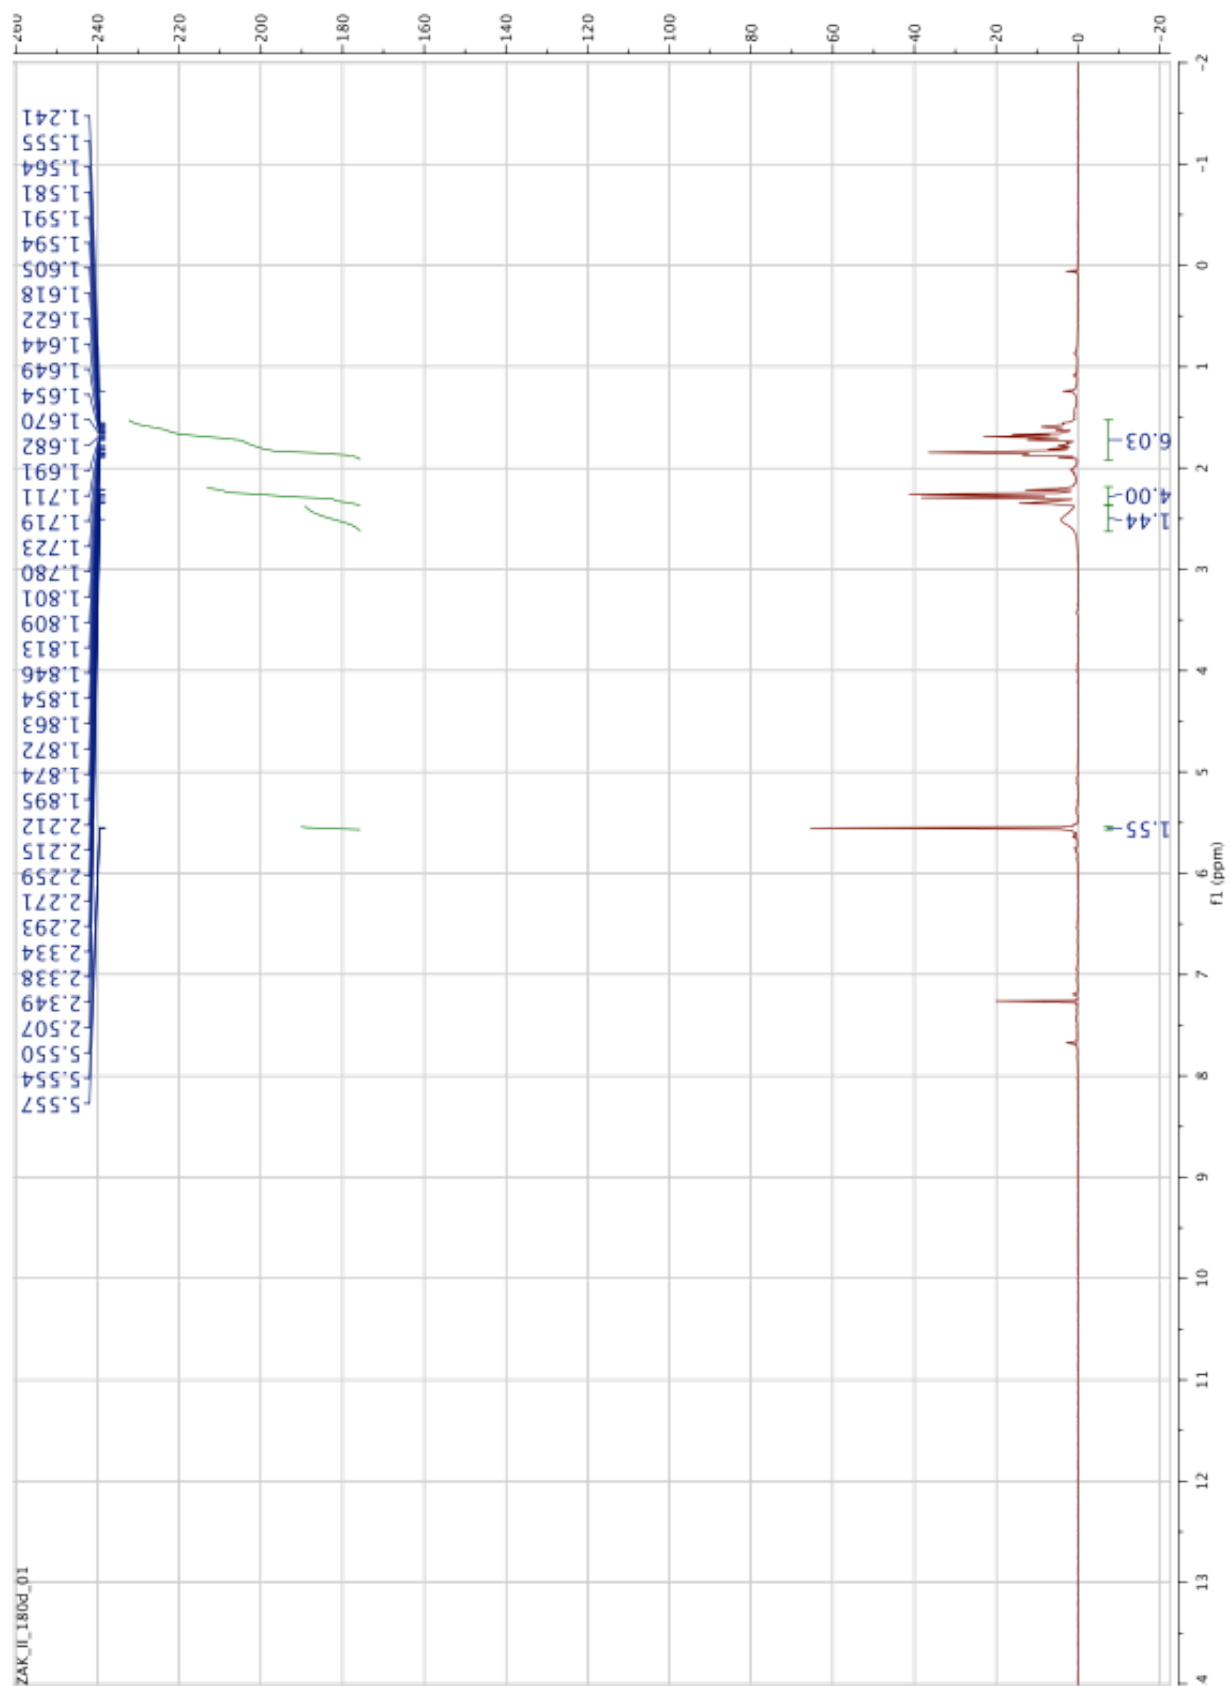

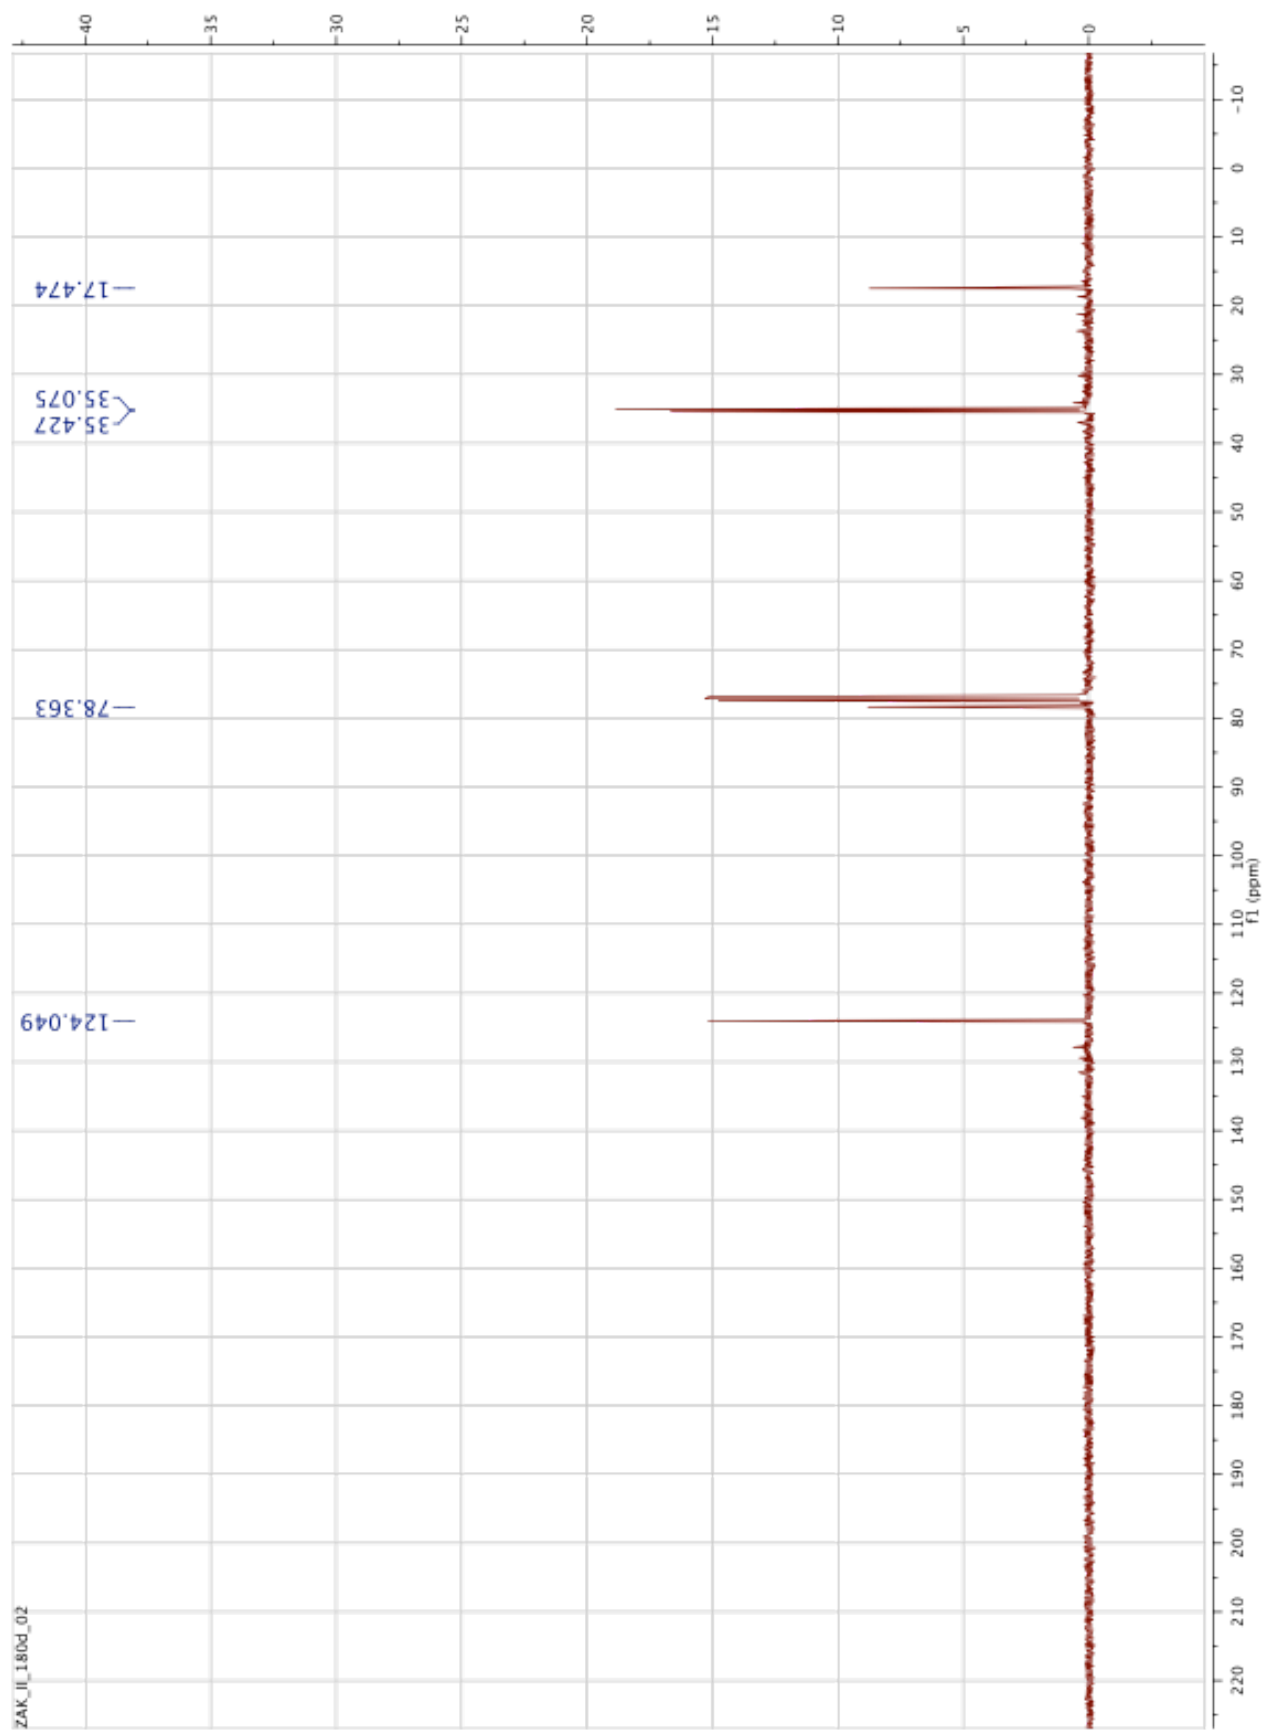



**(3aS\*,7aR\*)-5-(4-methylpent-3-en-1-yl)-2,3,3a,4,7,7a-hexahydro-1H-indene-3a,7a diol (3c)**

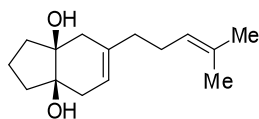

To an oven dried pressure tube equipped with a stir bar and sealed with a septum under argon was added *cis*-1,2-cyclopentanediol **1a** (30.6 mg, 0.3 mmol, 100 mol%), Ru<sub>3</sub>(CO)<sub>12</sub> (3.8 mg, 0.006 mmol, 2 mol%), 3,5-dimethylbenzoic acid (4.5 mg, 0.03 mmol, 10 mol%), and dppp (7.4 mg, 0.018 mmol, 6 mol%). The vessel was purged with argon, and toluene (0.15 mL, 2.0 M) was added via syringe. Myrcene **2c** (0.23mL, 1.2 mmol, 400 mol%) was added via syringe. The septum was replaced with a screw cap, and the reaction was heated to 130 °C. The reaction was allowed to stir for 48 hours. The volatiles were removed via rotary evaporation under reduced pressure, and the residue was subjected to flash column chromatography (SiO<sub>2</sub>: 1:4, ethyl acetate: hexanes) to furnish cycloadduct **3c** (64.6 mg, 0.273 mmol, 91% yield) as a colorless oil.

**TLC (SiO<sub>2</sub>):** R<sub>f</sub> = 0.30 (2:3, ethyl acetate: hexanes).

**<sup>1</sup>H NMR (400 MHz, CDCl<sub>3</sub>):** δ 5.25 (m, 1H), 5.06 (m, 1H), 2.32-1.93 (m, 10H), 1.89-1.79 (m, 3H), 1.71-1.63 (m, 4H), 1.59 (s, 3H) ppm.

**<sup>13</sup>C NMR (100 MHz, CDCl<sub>3</sub>):** δ 135.0, 131.6, 124.0, 117.5, 78.8, 78.2, 38.4, 37.0, 35.6, 35.06, 34.97, 26.2, 25.7, 17.7, 17.5 ppm.

**LRMS (CI<sup>+</sup>):** Calculated for C<sub>15</sub>H<sub>23</sub>O<sup>+</sup> (M-OH) 219; Found 219.

**FTIR (neat):** ν 3413, 2964, 2915, 1376, 1101, 951 cm<sup>-1</sup>.

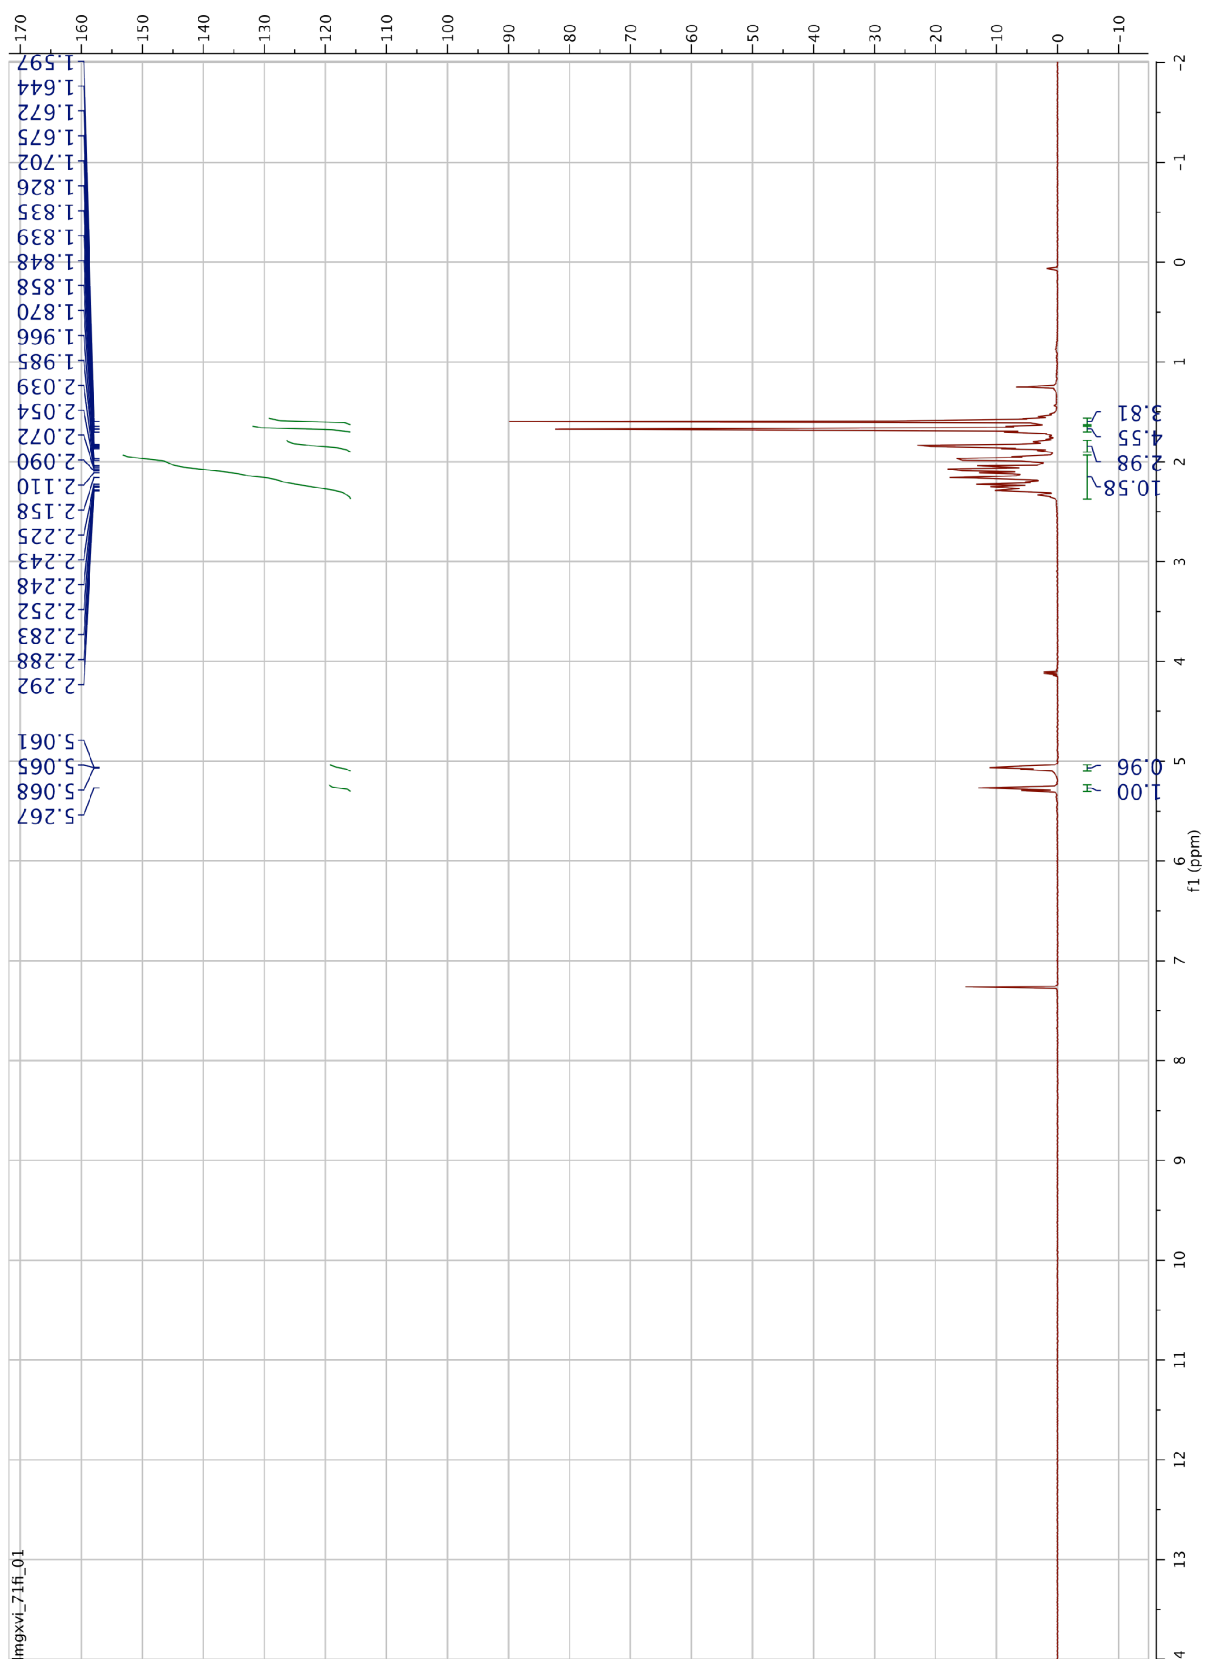

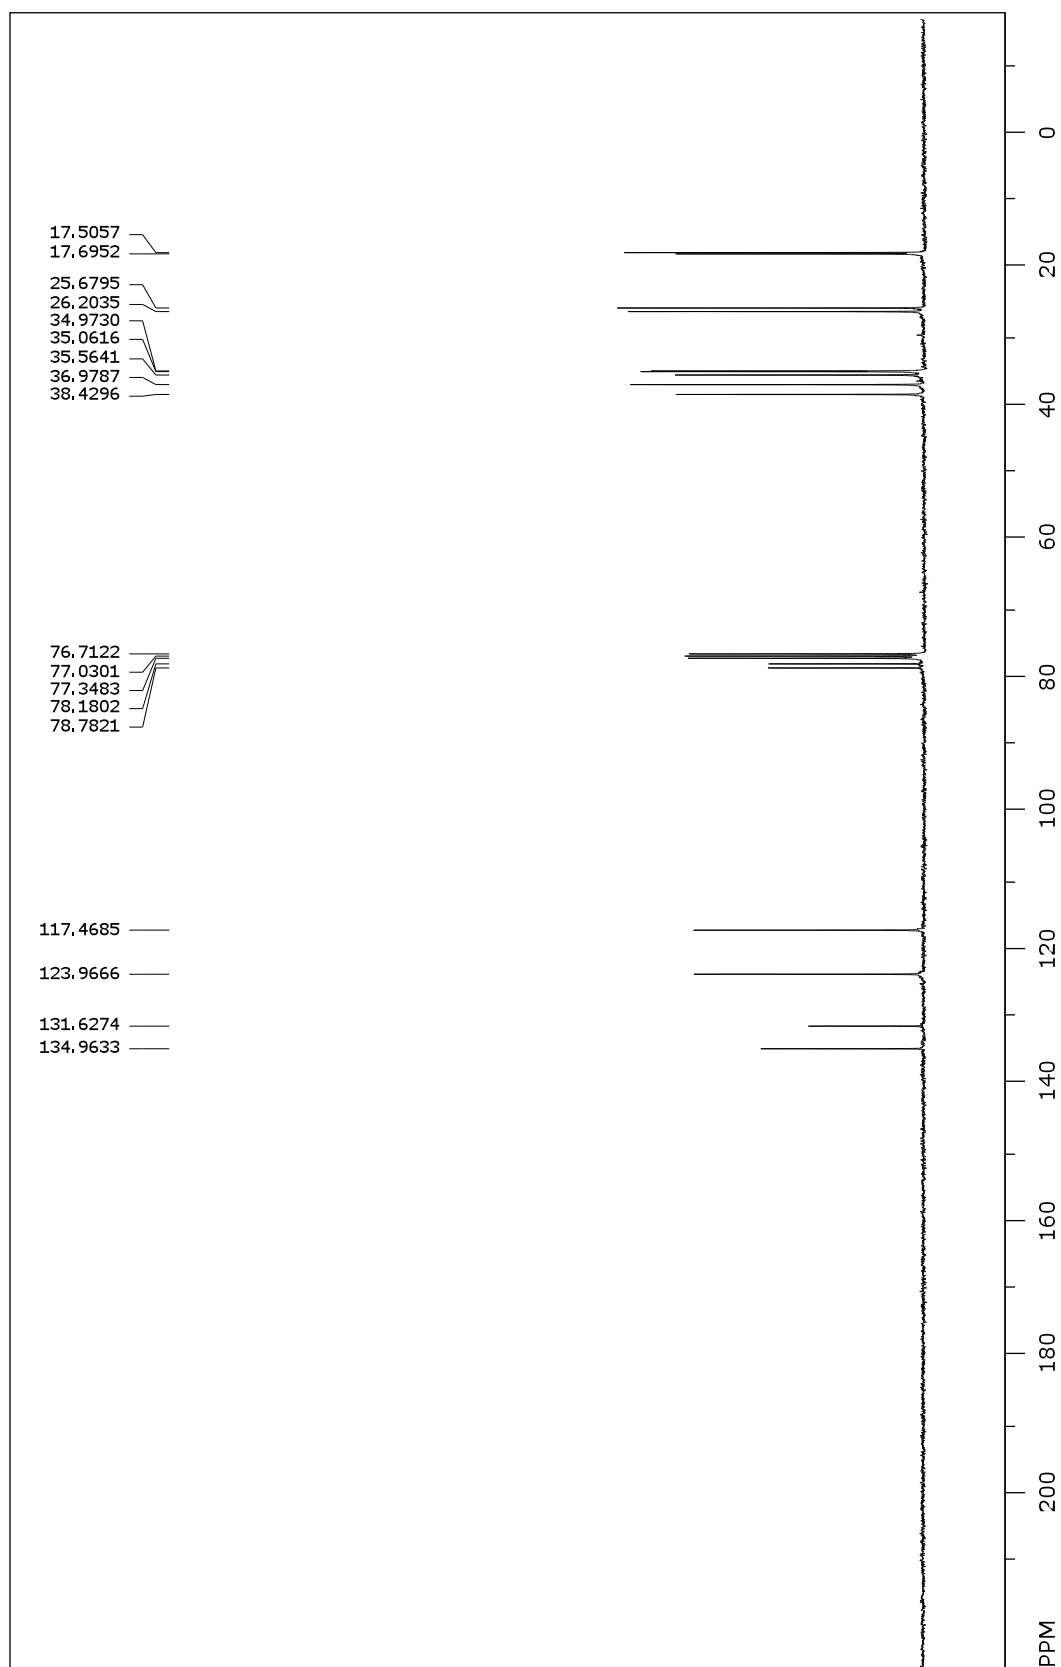

**(4a*R*,9a*S*)-1,4,6,7,8,9-hexahydro-4a*H*-benzo[7]annulene-4a,9a(5*H*)-diol (**3g**)**

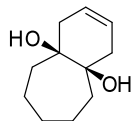

To an oven dried pressure tube equipped with a stir bar and sealed with a septum under argon was added *trans*-1,2-cycloheptanediol **1c** (39.1 mg, 0.3 mmol, 100 mol%), Ru<sub>3</sub>(CO)<sub>12</sub> (3.8 mg, 0.006 mmol, 2 mol%), and *rac*-BINAP (11.2 mg, 0.018 mmol, 6 mol%). The vessel was purged with argon, and toluene (0.15 mL, 2.0 M) was added via syringe. Freshly condensed butadiene **2a** (0.13 mL, 1.5 mmol, 500 mol%) was added at -78 °C via syringe. The septum was replaced with a screw cap, and the reaction was heated to 130 °C. The reaction was allowed to stir for 48 hours. The volatiles were removed via rotary evaporation under reduced pressure, and the residue was subjected to flash column chromatography (SiO<sub>2</sub>: 2:3- 3:2, ethyl acetate: hexanes) to furnish cycloadduct **3g** (45.0 mg, 0.247 mmol, 82% yield) as a colorless solid.

**TLC (SiO<sub>2</sub>):** R<sub>f</sub> = 0.20 (3:7, ethyl acetate: hexanes).

**<sup>1</sup>H NMR (400 MHz, CDCl<sub>3</sub>):** δ 5.59 (t, *J* = 1.5 Hz, 2H), 2.32-2.21 (m, 4H), 2.11 (s, 2H), 1.99-1.92 (m, 2H), 1.75-1.64 (m, 3H), 1.56-1.43 (m, 5H) ppm.

**<sup>13</sup>C NMR (100 MHz, CDCl<sub>3</sub>):** δ 124.5, 75.3, 38.5, 36.0, 26.3, 21.0 ppm.

**MP:** 73 -76 °C.

**LRMS (+ESI):** Calculated for C<sub>11</sub>H<sub>18</sub>NaO<sub>2</sub><sup>+</sup> (*M*+Na<sup>+</sup>) 205.1; Found 205.1.

**FTIR:** (neat): ν 3399, 2916, 1408, 1049, 1202, 1112, 1079, 1049, 1034, 1009, 977, 884, 801, 662 cm<sup>-1</sup>.

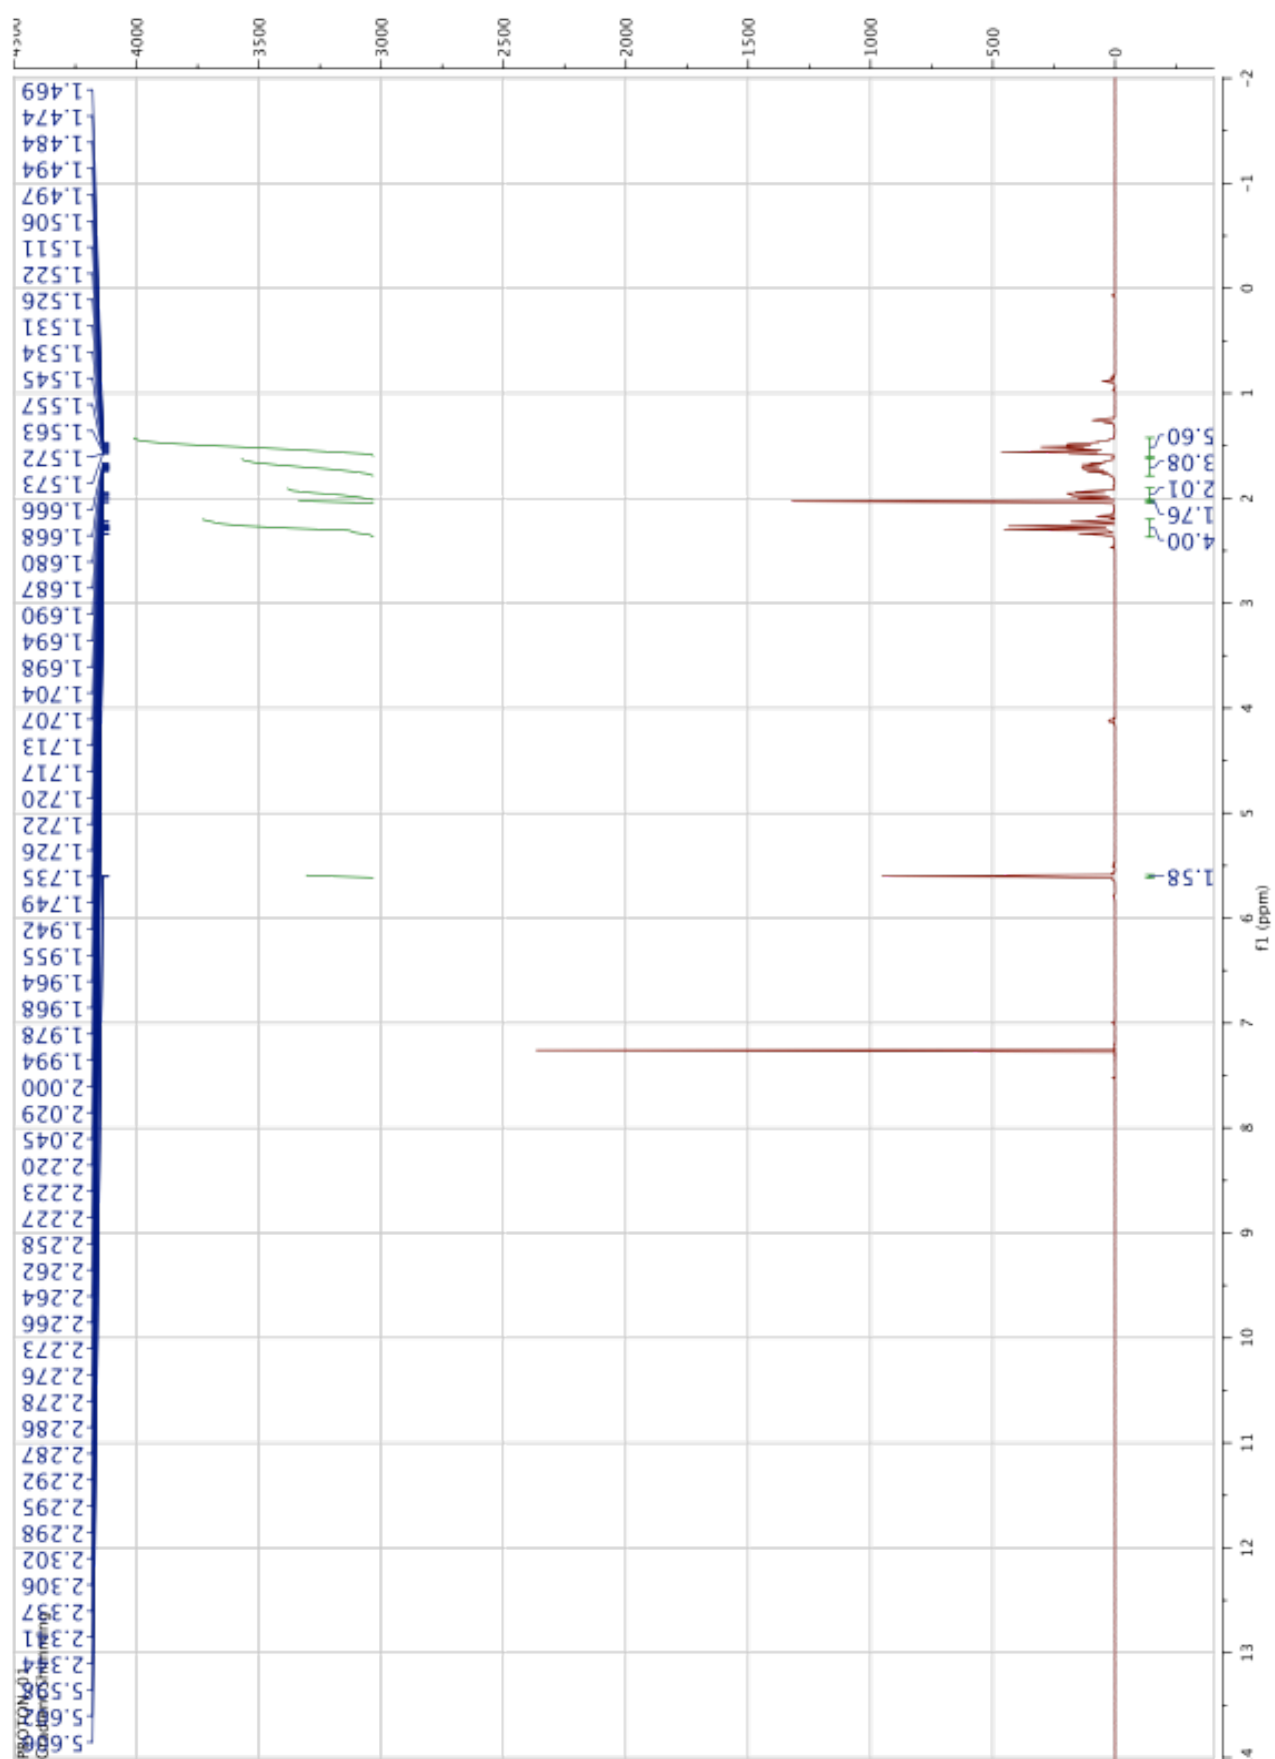

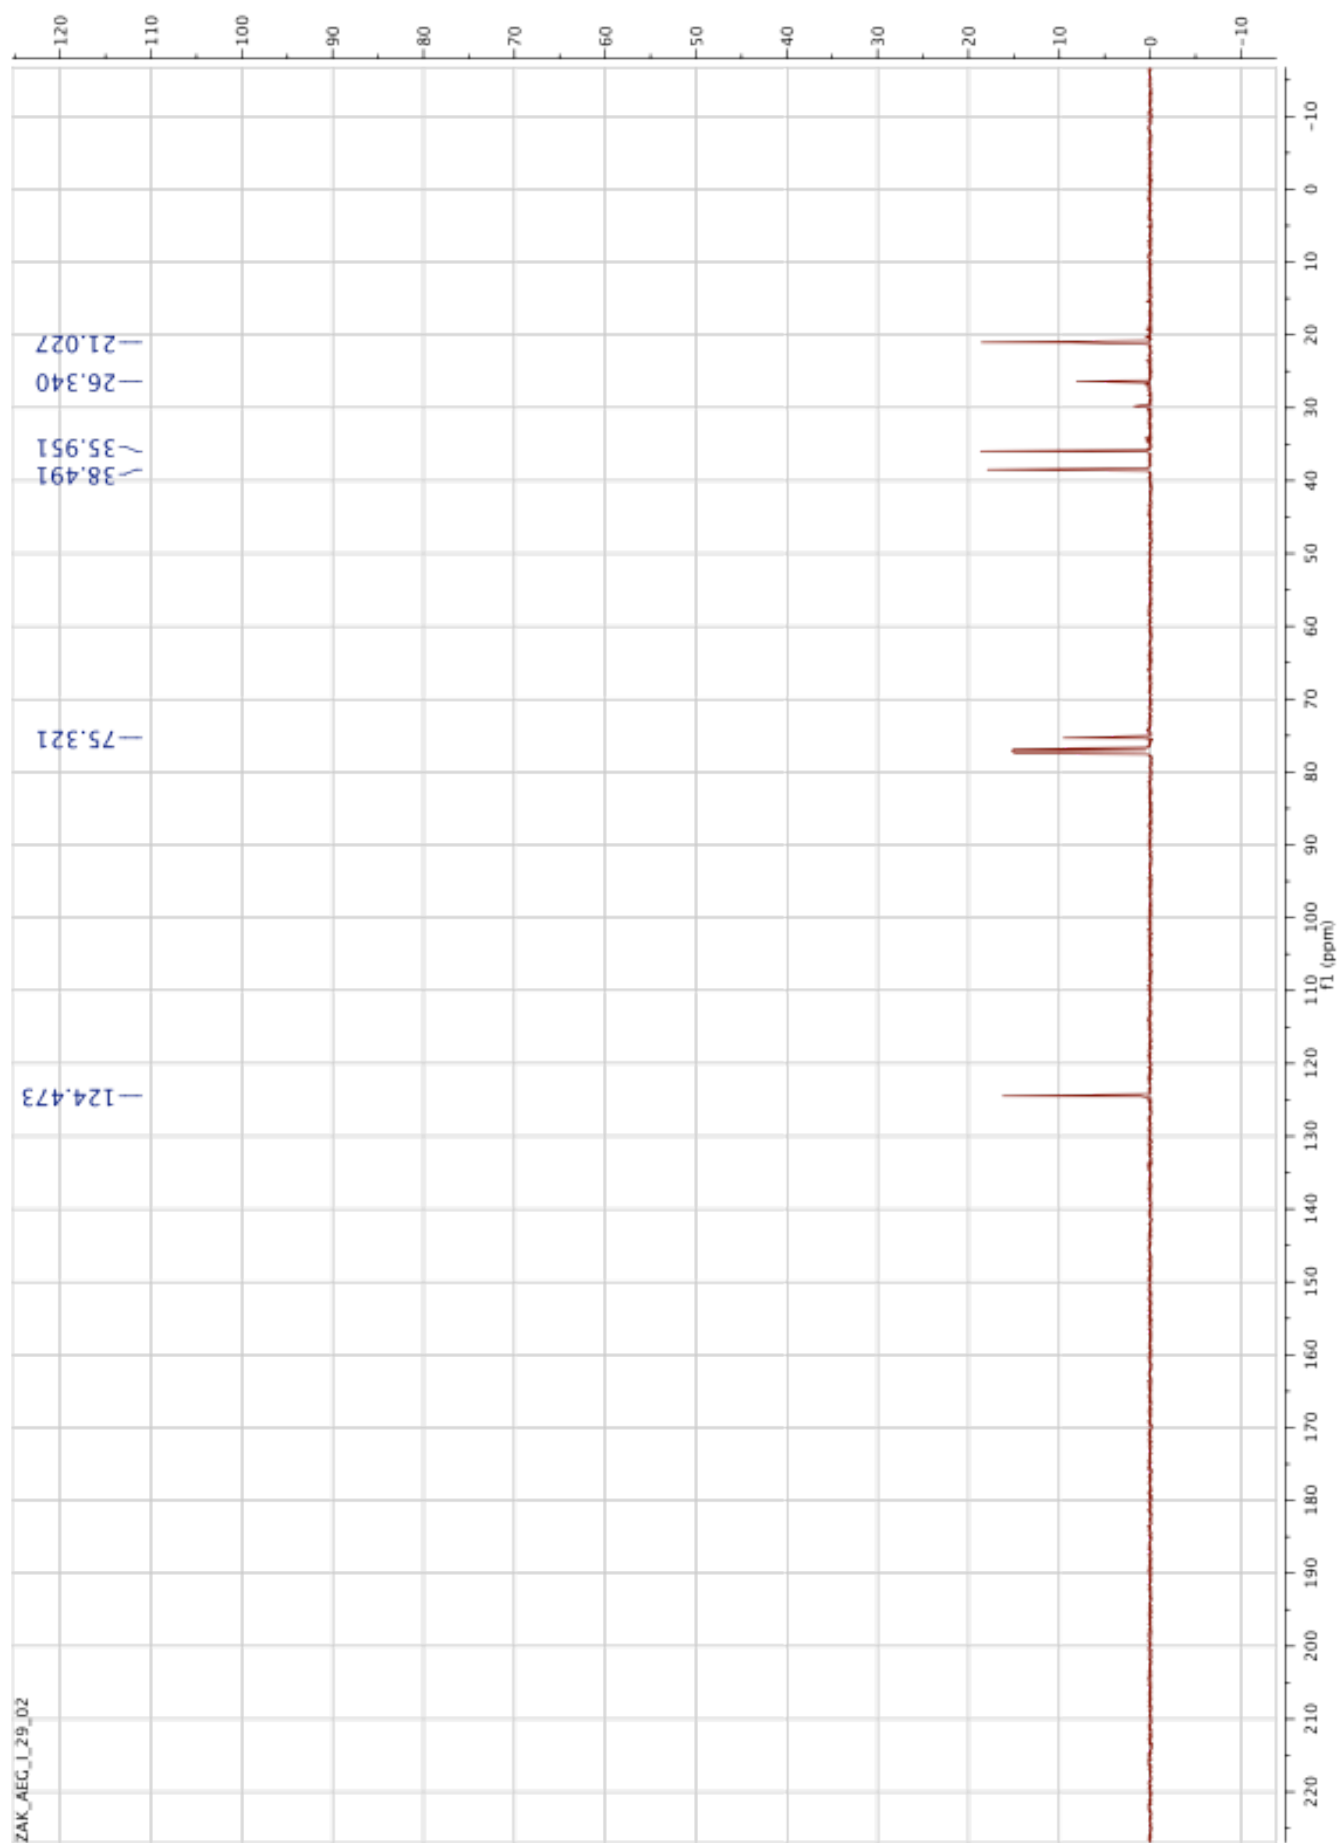

**(4a*S*\*,9a*R*\*)-2-(4-methylpent-3-en-1-yl)-1,4,6,7,8,9-hexahydro-4a*H*-benzo[7]annulene-4a,9a(5*H*)-diol (3i)**

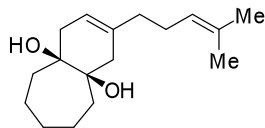

To an oven dried pressure tube equipped with a stir bar and sealed with a septum under argon was added *trans*-1,2-cycloheptanediol **1c** (39.1 mg, 0.30 mmol, 100 mol%), Ru<sub>3</sub>(CO)<sub>12</sub> (3.8 mg, 0.006 mmol, 2 mol%), and dppp (7.4 mg, 0.018 mmol, 6 mol%). The vessel was purged with argon, and toluene (0.15 mL, 2.0 M) was added via syringe. Myrcene **2c** (0.23mL, 1.2 mmol, 400 mol%) was added via syringe. The septum was replaced with a screw cap, and the reaction was heated to 130 °C. The reaction was allowed to stir for 18 hours. The volatiles were removed via rotary evaporation under reduced pressure, and the residue was subjected to flash column chromatography (SiO<sub>2</sub>: 1:4, ethyl acetate: hexanes) to furnish cycloadduct **3i** (52.0 mg, 0.197 mmol, 66% yield) as a colorless oil.

**TLC (SiO<sub>2</sub>):** R<sub>f</sub> = 0.26 (3:7, ethyl acetate: hexanes).

**<sup>1</sup>H NMR (400 MHz, CDCl<sub>3</sub>):** δ 5.23 (s, 1H), 5.07 (t, *J* = 6.8 Hz, 1H), 2.31-1.88 (m, 12H), 1.74-1.63 (m, 6H), 1.60 (s, 3H), 1.53-1.45 (m, 5H) ppm.

**<sup>13</sup>C NMR (100 MHz, CDCl<sub>3</sub>):** δ 135.5, 131.8, 124.1, 118.0, 75.6, 75.2, 41.6, 38.4, 37.1, 35.9, 35.8, 26.4, 26.3, 25.8, 21.08, 21.06, 17.9 ppm.

**LRMS (+ESI):** Calculated for C<sub>17</sub>H<sub>28</sub>NaO<sub>2</sub><sup>+</sup> (*M*+Na<sup>+</sup>) 287.2; Found 287.2.

**FTIR (neat):** ν 3403, 2918, 2860, 1619, 1588, 1437, 1284, 1228, 1104, 1045, 1014, 864, 821, 780, 652 cm<sup>-1</sup>.

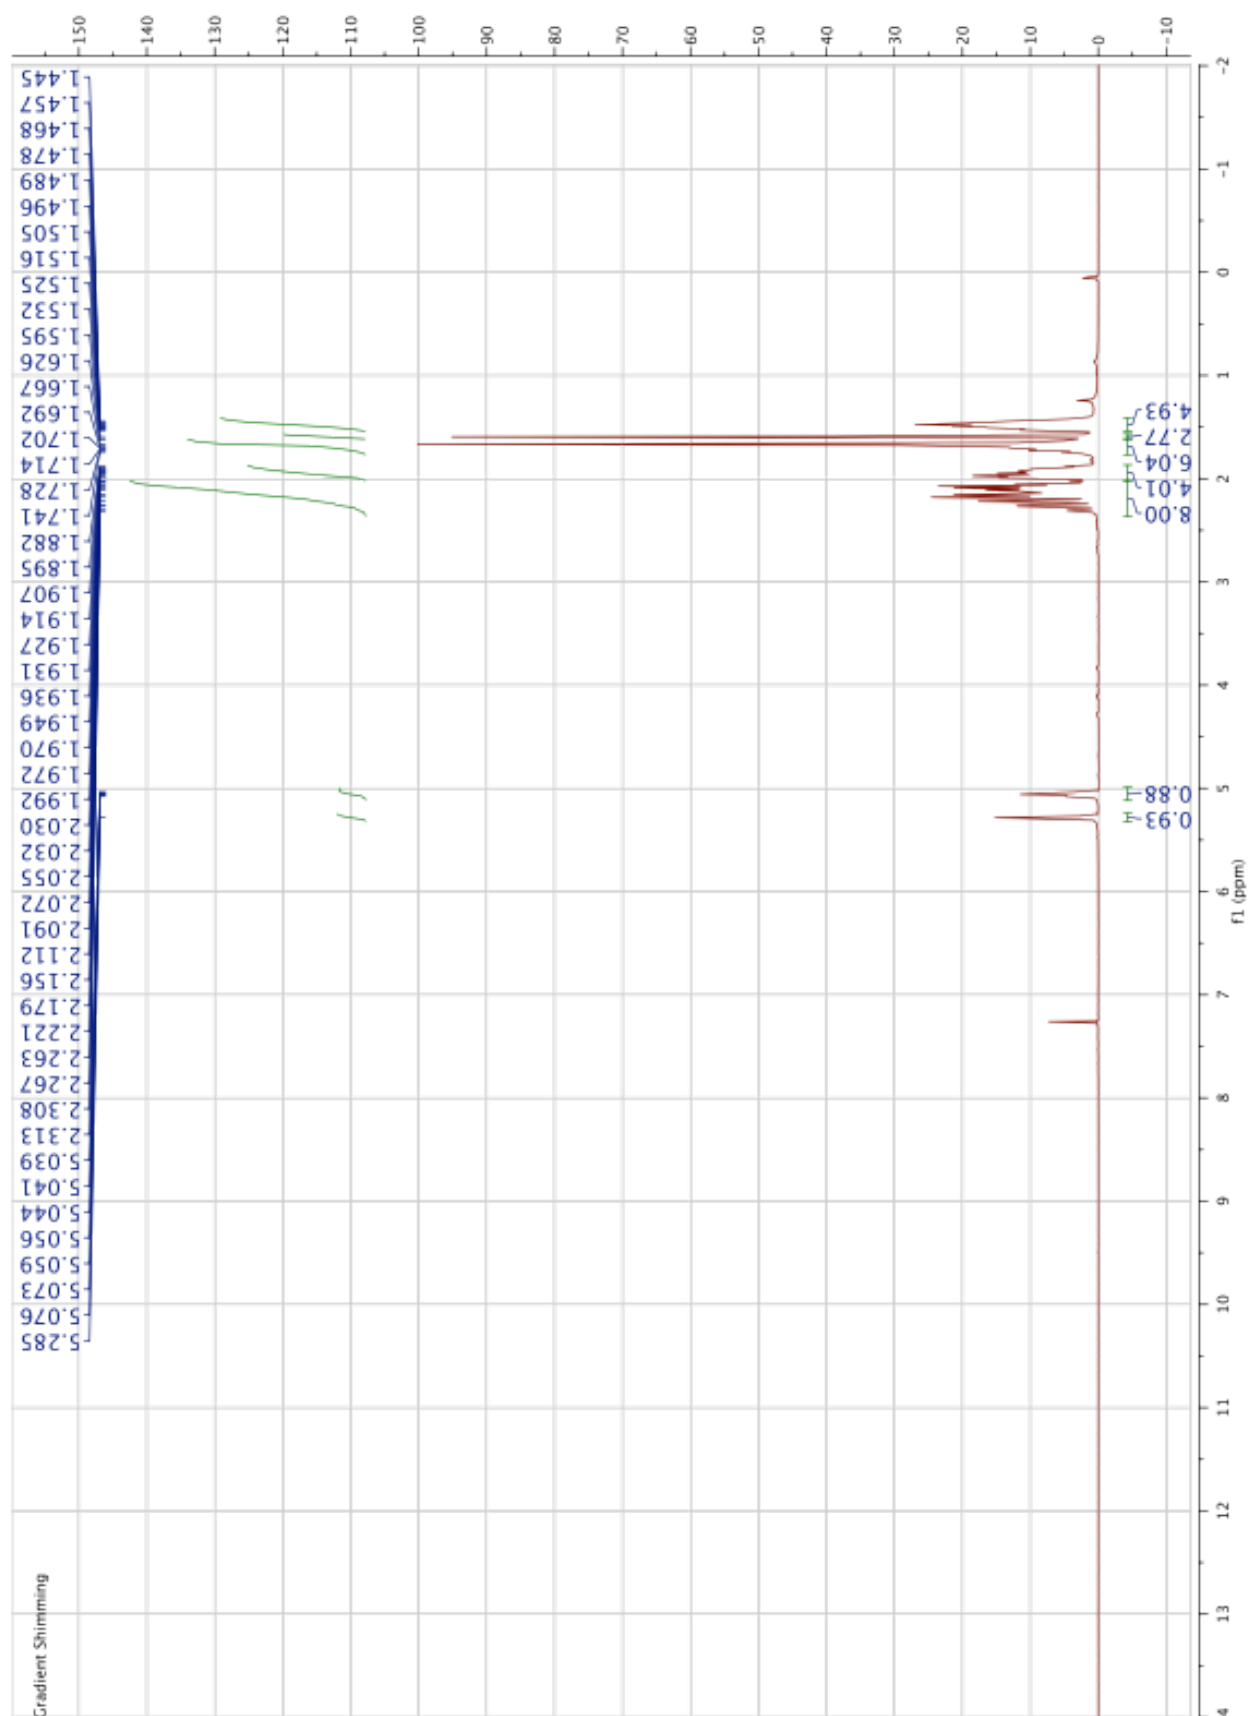



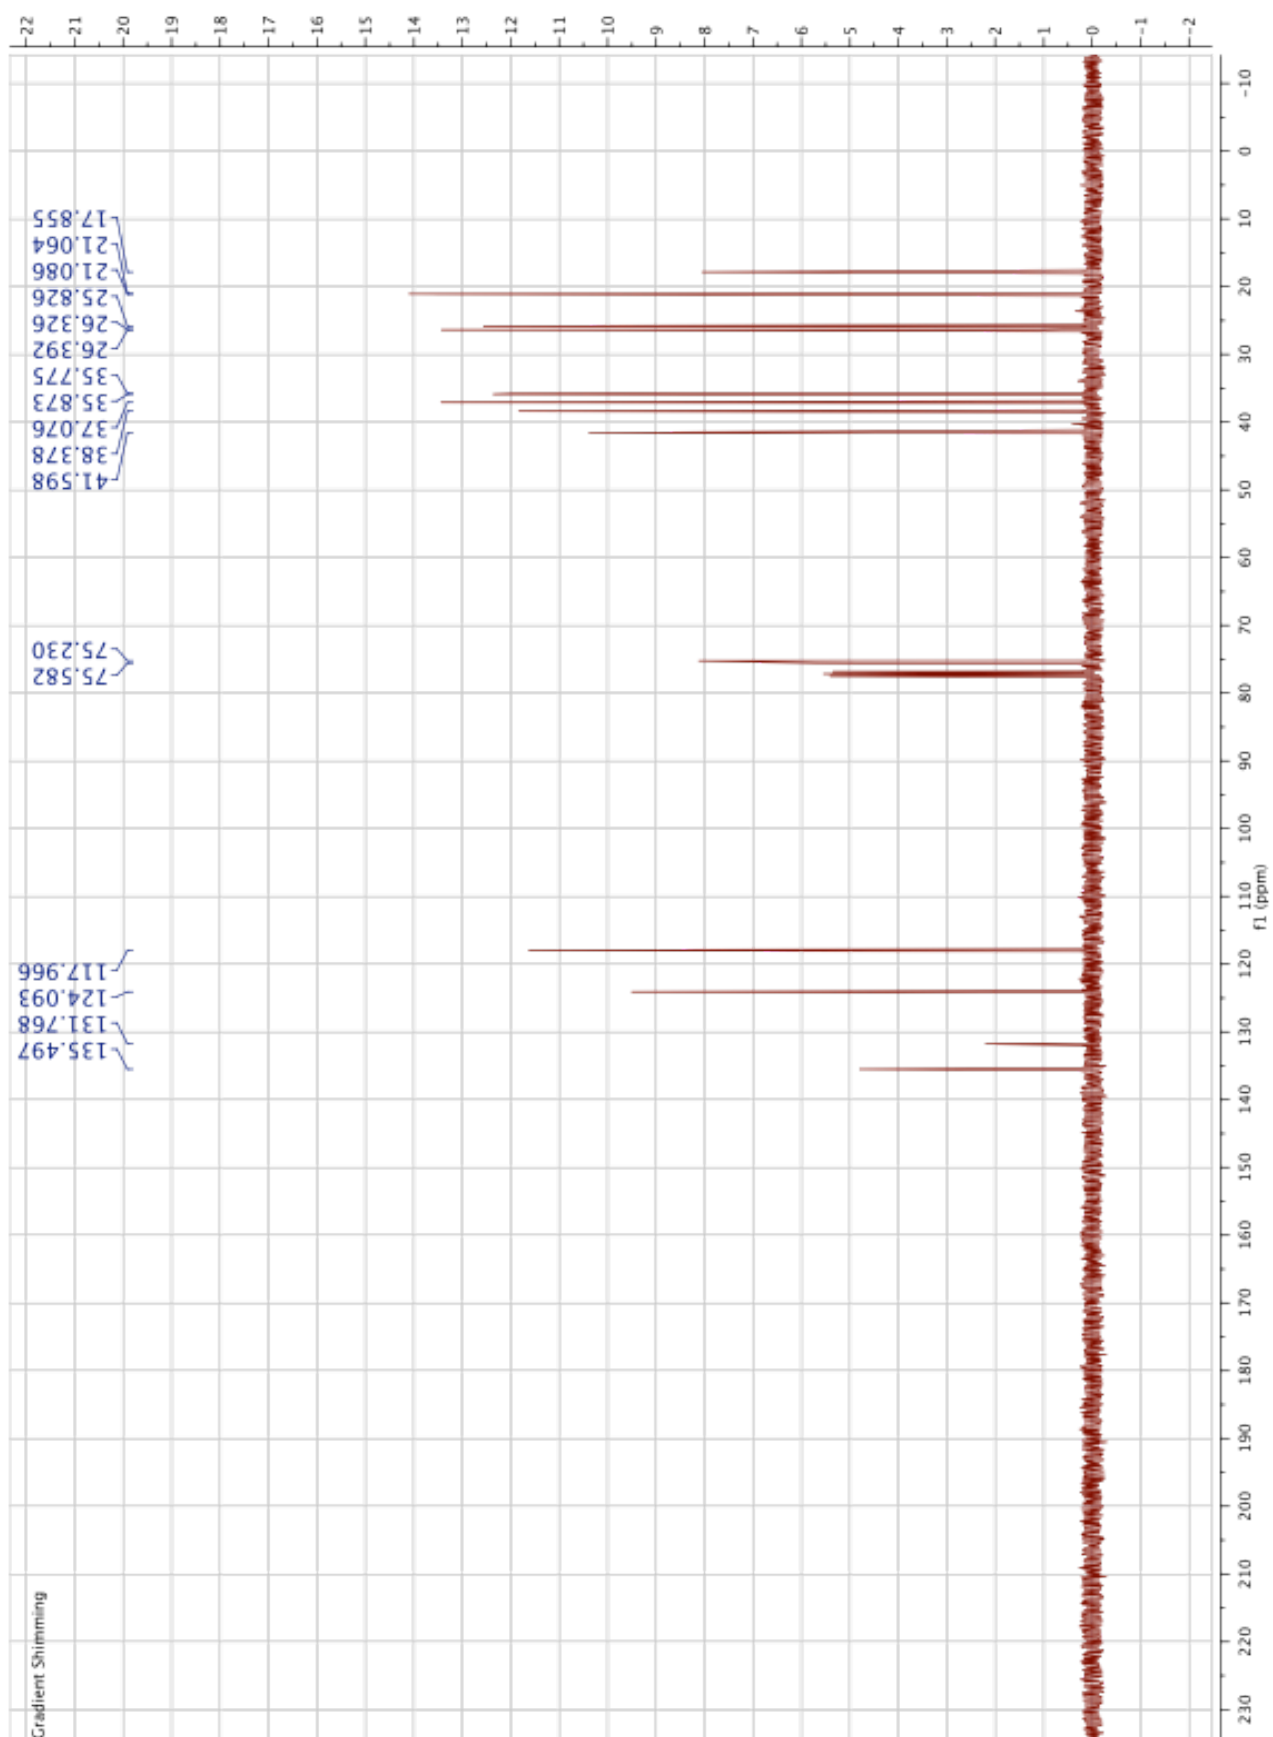

**(4aR\*,10aS\*)-1,4,5,6,7,8,9,10-octahydrobenzo[8]annulene-4a,10a-diol (3j)**

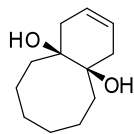

To an oven dried pressure tube equipped with a stir bar and sealed with a septum under argon was *cis*-1,2-cyclooctanediol **1d** (43.2 mg, 0.30 mmol, 100 mol%),  $\text{Ru}_3(\text{CO})_{12}$  (3.8 mg, 0.006 mmol, 2 mol%), and dppp (11.5 mg, 0.018 mmol, 6 mol%). The vessel was purged with argon, and toluene (0.15 mL, 2.0 M) was added via syringe. Freshly condensed butadiene **2a** (0.13 mL, 1.5 mmol, 500 mol%) was added at -78 °C via syringe. The septum was replaced with a screw cap, and the reaction was heated to 130 °C. The reaction was allowed to stir for 48 hours. The volatiles were removed via rotary evaporation under reduced pressure, and the residue was subjected to flash column chromatography ( $\text{SiO}_2$ : 3:7, ethyl acetate: hexanes) to furnish the cycloadduct **3j** (36.6 mg, 0.186 mmol, 62% yield) as a colorless solid.

**TLC ( $\text{SiO}_2$ ):**  $R_f$  = 0.33 (2:3 ethyl acetate: hexanes).

**$^1\text{H}$  NMR (400 MHz,  $\text{CDCl}_3$ ):**  $\delta$  5.58 (s, 2H), 2.35-2.24 (m, 4H), 2.18 (s, 2H), 1.95 (ddd,  $J$ =15.2, 9.4, 2.4 Hz, 2H), 1.85-1.77 (m, 2H), 1.68-1.44 (m, 8H) ppm.

**$^{13}\text{C}$  NMR (100 MHz,  $\text{CDCl}_3$ ):**  $\delta$  124.4, 75.0, 40.2, 36.0, 28.2, 23.2 ppm.

**MP:** 103-104 °C.

**LRMS (+ESI):** Calculated for  $\text{C}_{12}\text{H}_{20}\text{NaO}_2^+$  ( $M+\text{Na}^+$ ) 219.1; Found 219.1.

**FTIR (neat):**  $\nu$  3390, 3306, 3024, 2942, 2917, 2849, 1458, 1408, 1317, 1158, 1057, 1030, 995, 983, 964, 889, 855, 768, 749, 662  $\text{cm}^{-1}$ .

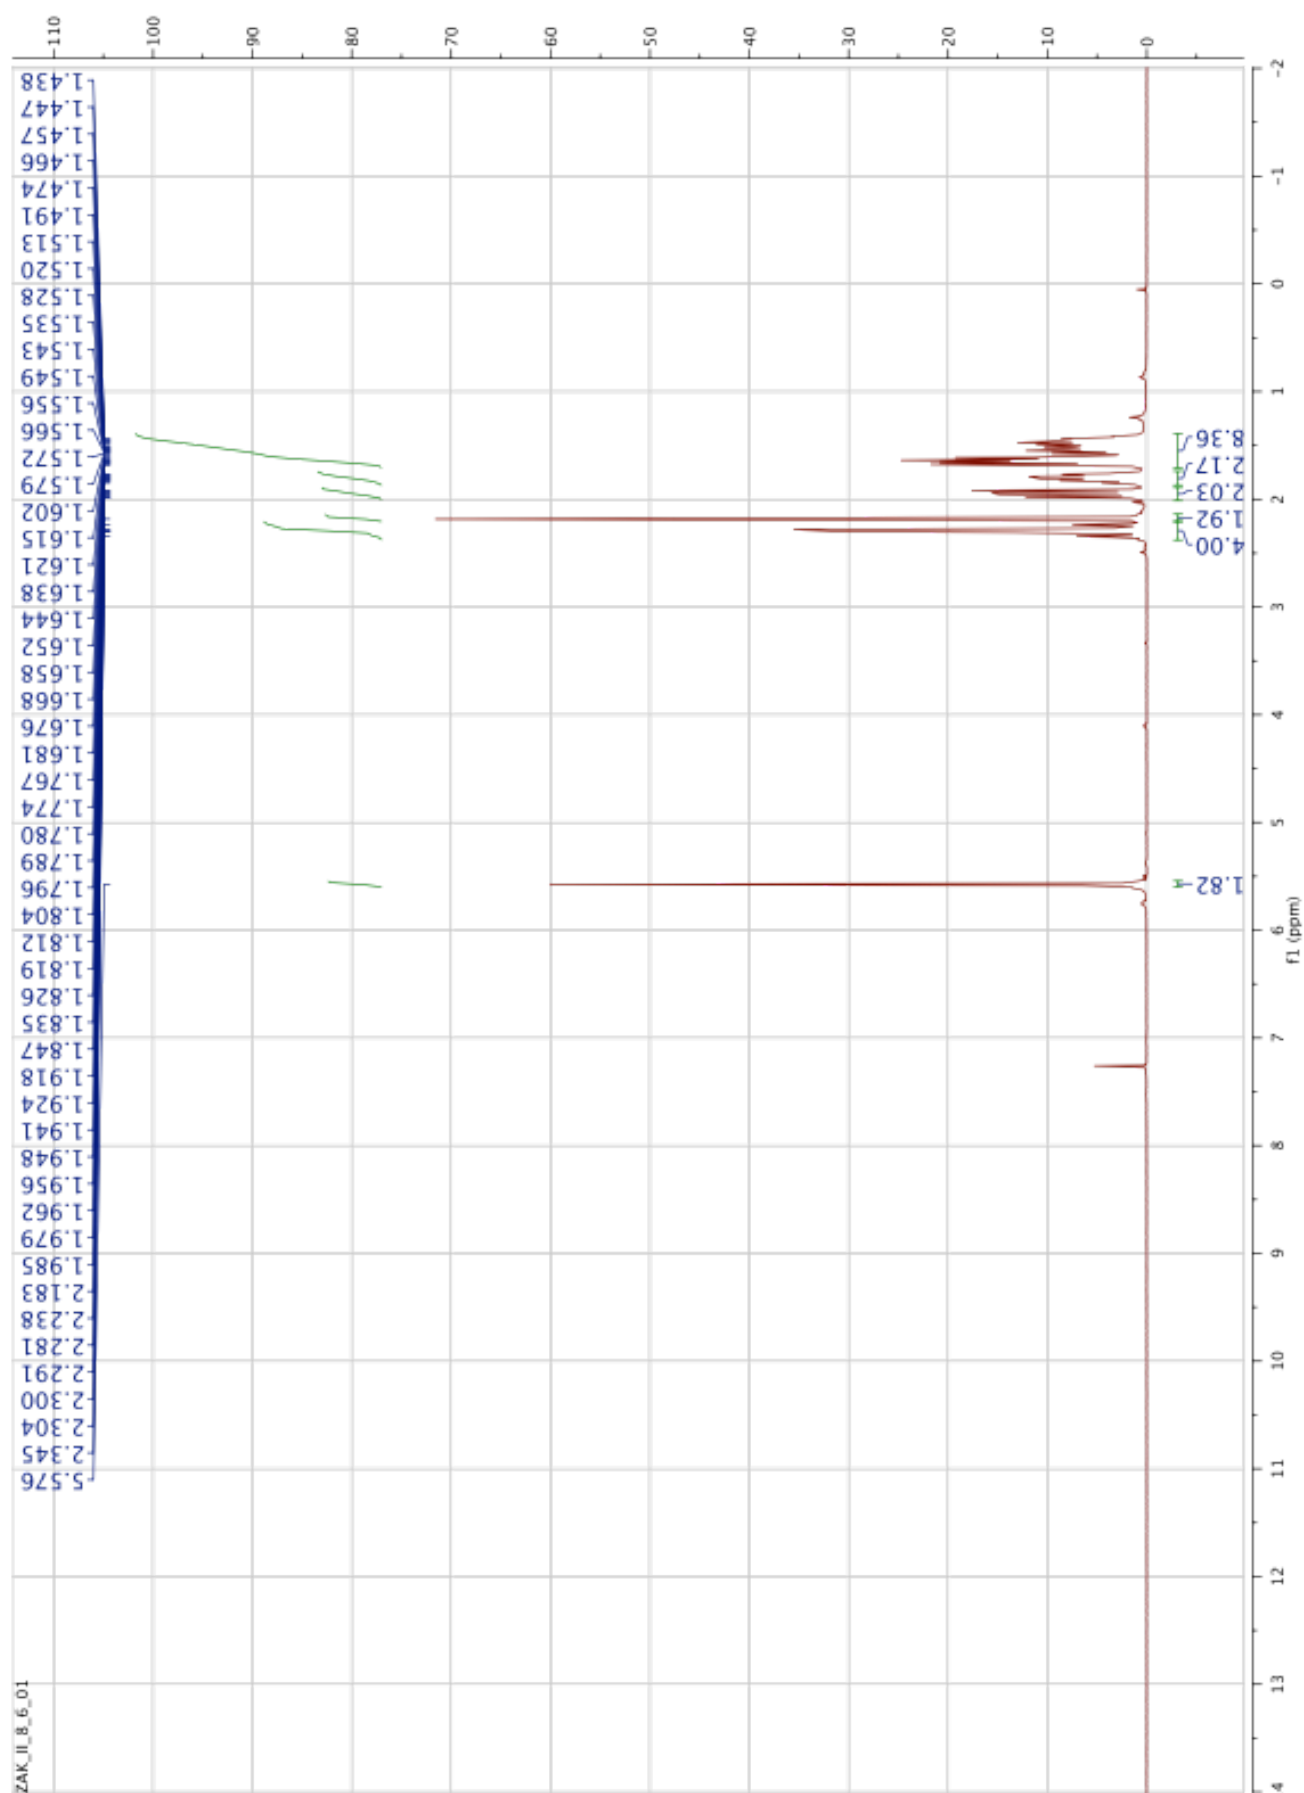

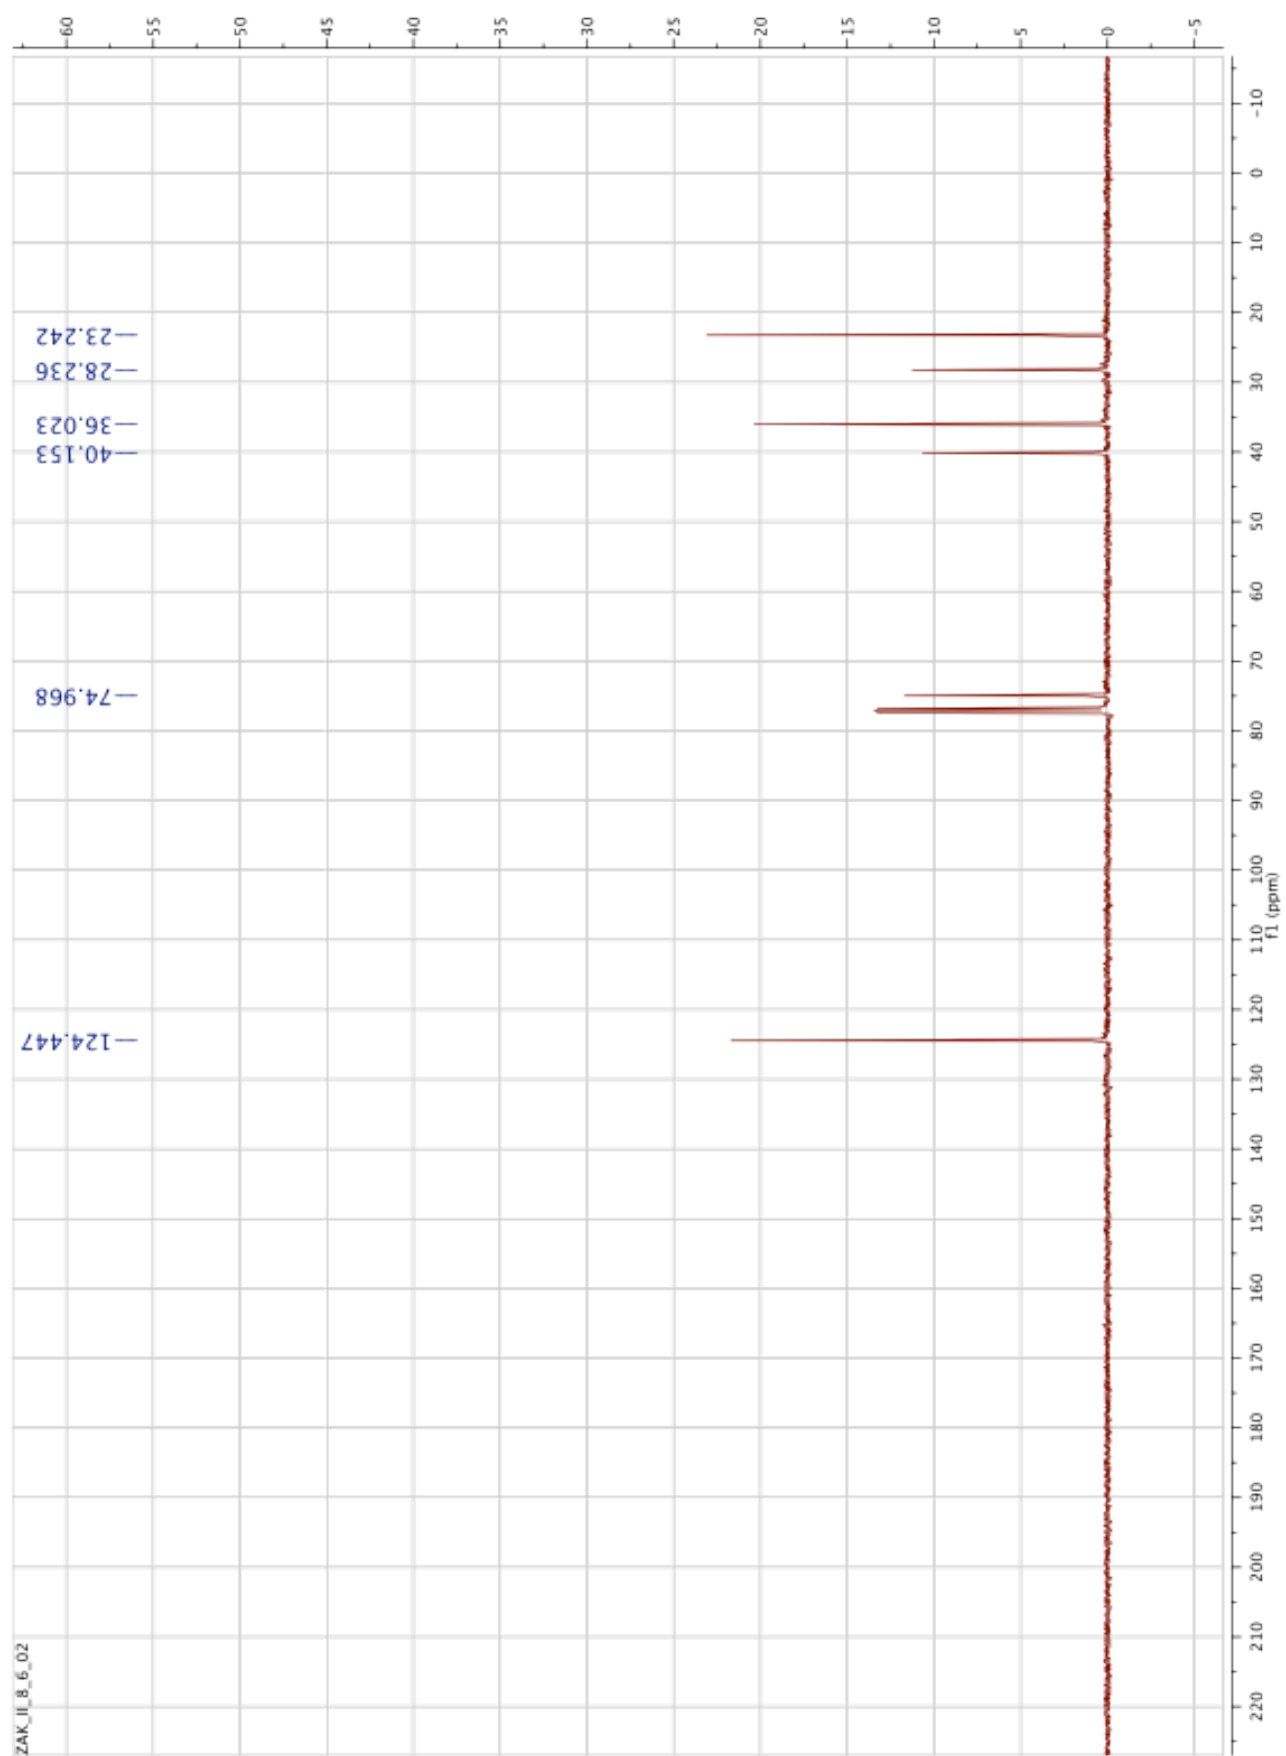

**(4a*R*\*,10a*S*\*)-2-(4-methylpent-3-en-1-yl)-1,4,4a,5,6,7,8,9,10,10a-decahydrobenzo[8]annulene-4a,10a-diol (**3l**)**

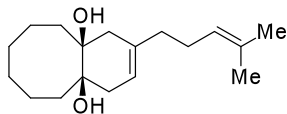

To an oven dried pressure tube equipped with a stir bar and sealed with a septum under argon was added *cis*-1,2-cyclooctanediol **1d** (39.1 mg, 0.30 mmol, 100 mol%), Ru<sub>3</sub>(CO)<sub>12</sub> (3.8 mg, 0.006 mmol, 2 mol%), dppp (7.4 mg, 0.018 mmol, 6 mol%), and 3,5-dimethylbenzoic acid (4.5 mg, 0.03 mmol, 10 mol%). The vessel was purged with argon, and toluene (0.15 mL, 2.0 M) was added via syringe. Myrcene **2c** (0.23mL, 1.2 mmol, 400 mol%) was added via syringe. The septum was replaced with a screw cap, and the reaction was heated to 130 °C. The reaction was allowed to stir for 48 hours. The volatiles were removed via rotary evaporation under reduced pressure, and the residue was subjected to flash column chromatography (SiO<sub>2</sub>: 1:19, ethyl acetate: hexanes) to furnish cycloadduct **3l** (63.0 mg, 0.225 mmol, 75% yield) as a colorless oil.

**TLC (SiO<sub>2</sub>):** R<sub>f</sub> = 0.48 (2:3, ethyl acetate: hexanes).

**<sup>1</sup>H NMR (400 MHz, CDCl<sub>3</sub>):** δ 5.28 (m, 1H), 5.06 (m, 1H), 2.37-2.24 (m, 2H), 2.20 (m, 2H), 2.16-2.04 (m, 4H), 2.00-1.88 (m, 4H), 1.87-1.76 (m, 2H), 1.70-1.40 (m, 8H), 1.67 (s, 3H), 1.60 (s, 3H) ppm.

**<sup>13</sup>C NMR (100 MHz, CDCl<sub>3</sub>):** δ 135.4, 131.6, 124.0, 117.8, 75.1, 74.8, 43.2, 39.9, 36.9, 35.80, 35.79, 28.2, 28.1, 26.2, 25.7, 23.13, 23.12, 17.7 ppm.

**LRMS (ESI<sup>+</sup>):** Calculated for C<sub>18</sub>H<sub>30</sub>NaO<sub>2</sub><sup>+</sup> (M+Na) 301; Found 301.

**FTIR (neat):** ν 3413, 2925, 2855, 1683, 1449, 1378, 1045 cm<sup>-1</sup>.

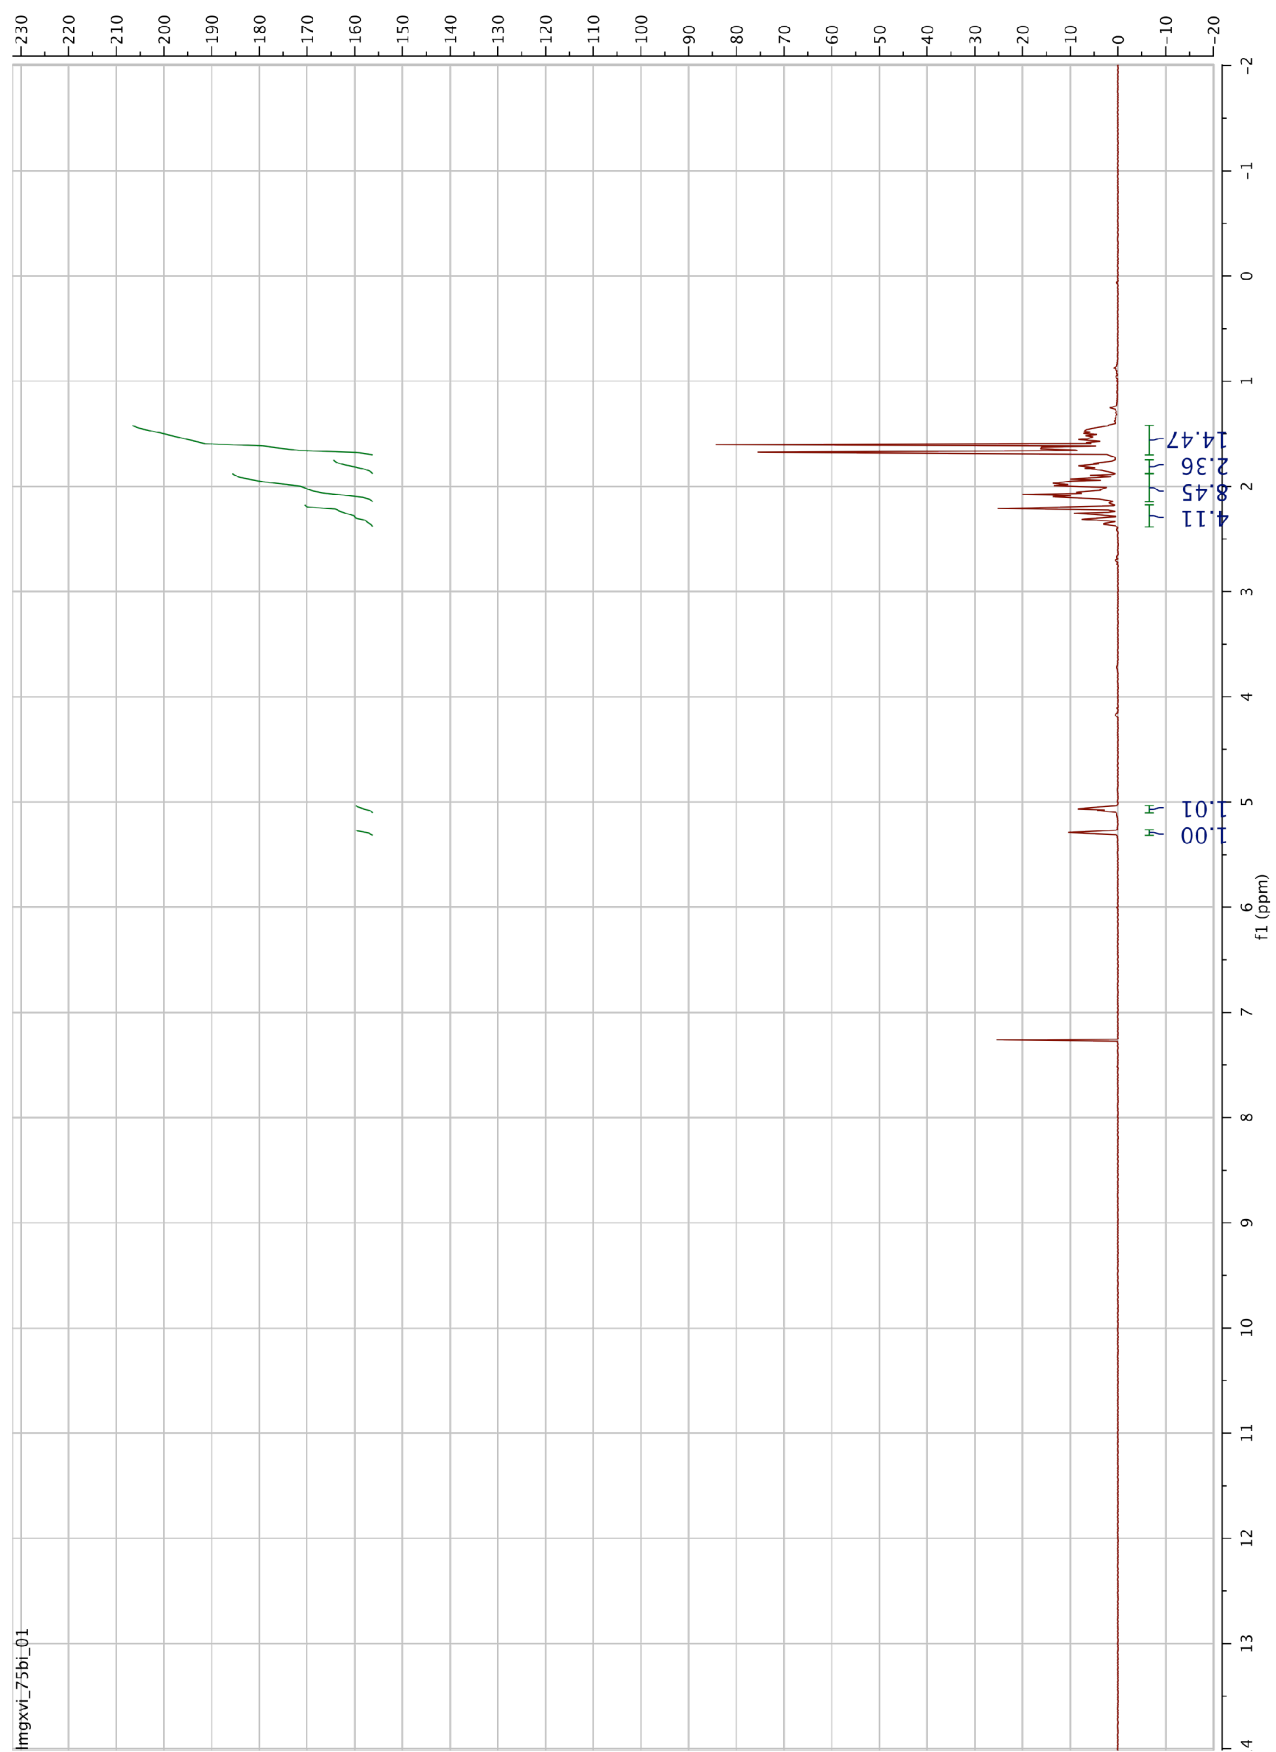

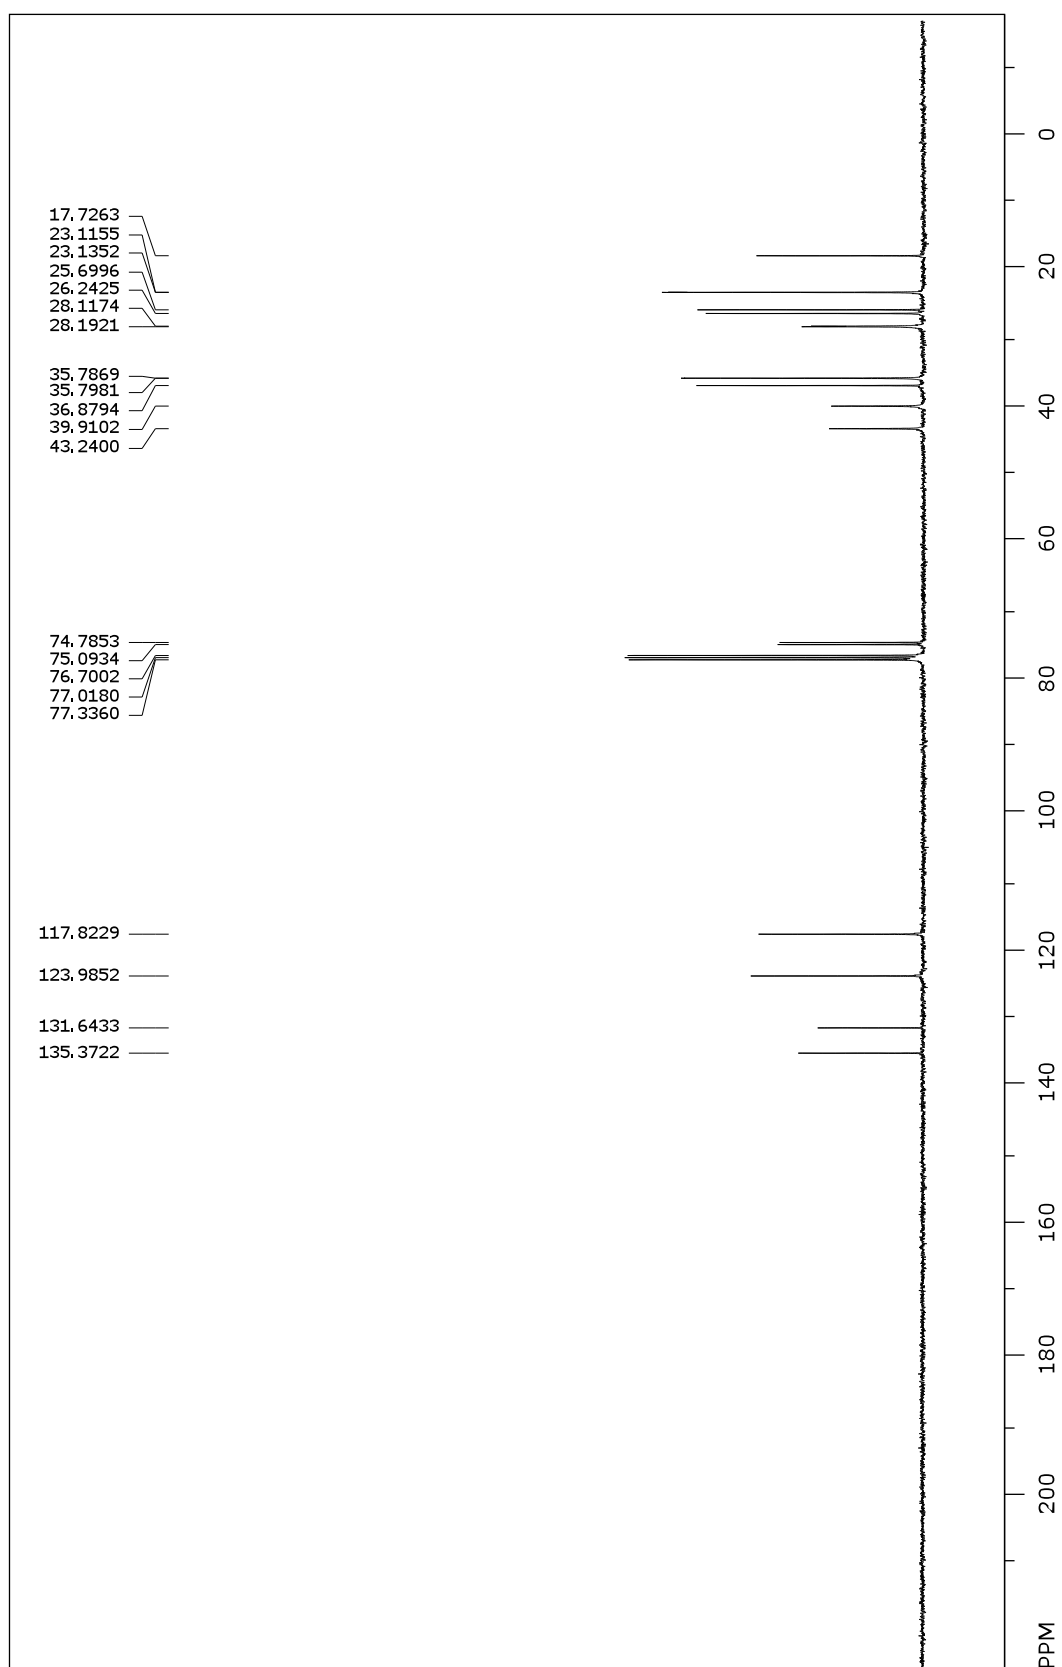

**(3aR\*,7aS\*)-1,3,3a,4,7,7a-hexahydroisobenzofuran-3a-7a-diol (3m) and (3aS\*,7aR\*)-1,3,3a,4,5,7a-hexahydroisobenzofuran-3a-7a-diol (*iso*-3m)**

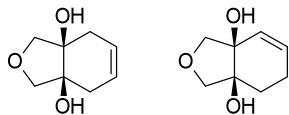

To an oven dried pressure tube equipped with a stir bar and sealed with a septum under argon was added  $\text{Ru}_3(\text{CO})_{12}$  (3.8 mg, 0.006 mmol, 2 mol%) and dppp (7.4 mg, 0.018 mmol, 6 mol%). The vessel was purged with argon, and toluene (0.15 mL, 2.0 M) was added via syringe. Tetrahydrofuran diol **1e** (31.2 mg, 0.30 mmol, 100 mol%) was then added. Freshly condensed butadiene **2a** (0.13 mL, 1.5 mmol, 500 mol%) was added at  $-78\text{ }^\circ\text{C}$  via syringe. The septum was replaced with a screw cap, and the reaction was heated to  $130\text{ }^\circ\text{C}$ . The reaction was allowed to stir for 4 hours. The volatiles were removed via rotary evaporation under reduced pressure, and the residue was subjected to flash column chromatography ( $\text{SiO}_2$ : 1:1, ethyl acetate: hexanes) to furnish the cycloadduct **3m** (44.6 mg, 0.2856 mmol, 95% yield, 5.2:1 rr) as a colorless solid.

**TLC ( $\text{SiO}_2$ ):**  $R_f = 0.08$  (2:3, ethyl acetate: hexanes).

**$^1\text{H}$  NMR (400 MHz,  $\text{CDCl}_3$ , major isomer):**  $\delta$  5.60 (m, 2H), 3.85 (d, 2H,  $J = 9\text{ Hz}$ ), 3.70 (d, 2H,  $J = 9\text{ Hz}$ ), 3.21 (br, 2H), 2.45-2.28 (m, 4H) ppm.

**$^{13}\text{C}$  NMR (100 MHz,  $\text{CDCl}_3$ , major isomer):**  $\delta$  123.8, 76.7, 76.5, 33.0 ppm.

**LRMS ( $\text{CI}^+$ ):** Calculated for  $\text{C}_8\text{H}_{11}\text{O}_2$  (M-OH) 139; Found 139.

**FTIR (neat):**  $\nu$  3350, 2886, 1110, 1029,  $1010\text{ cm}^{-1}$ .



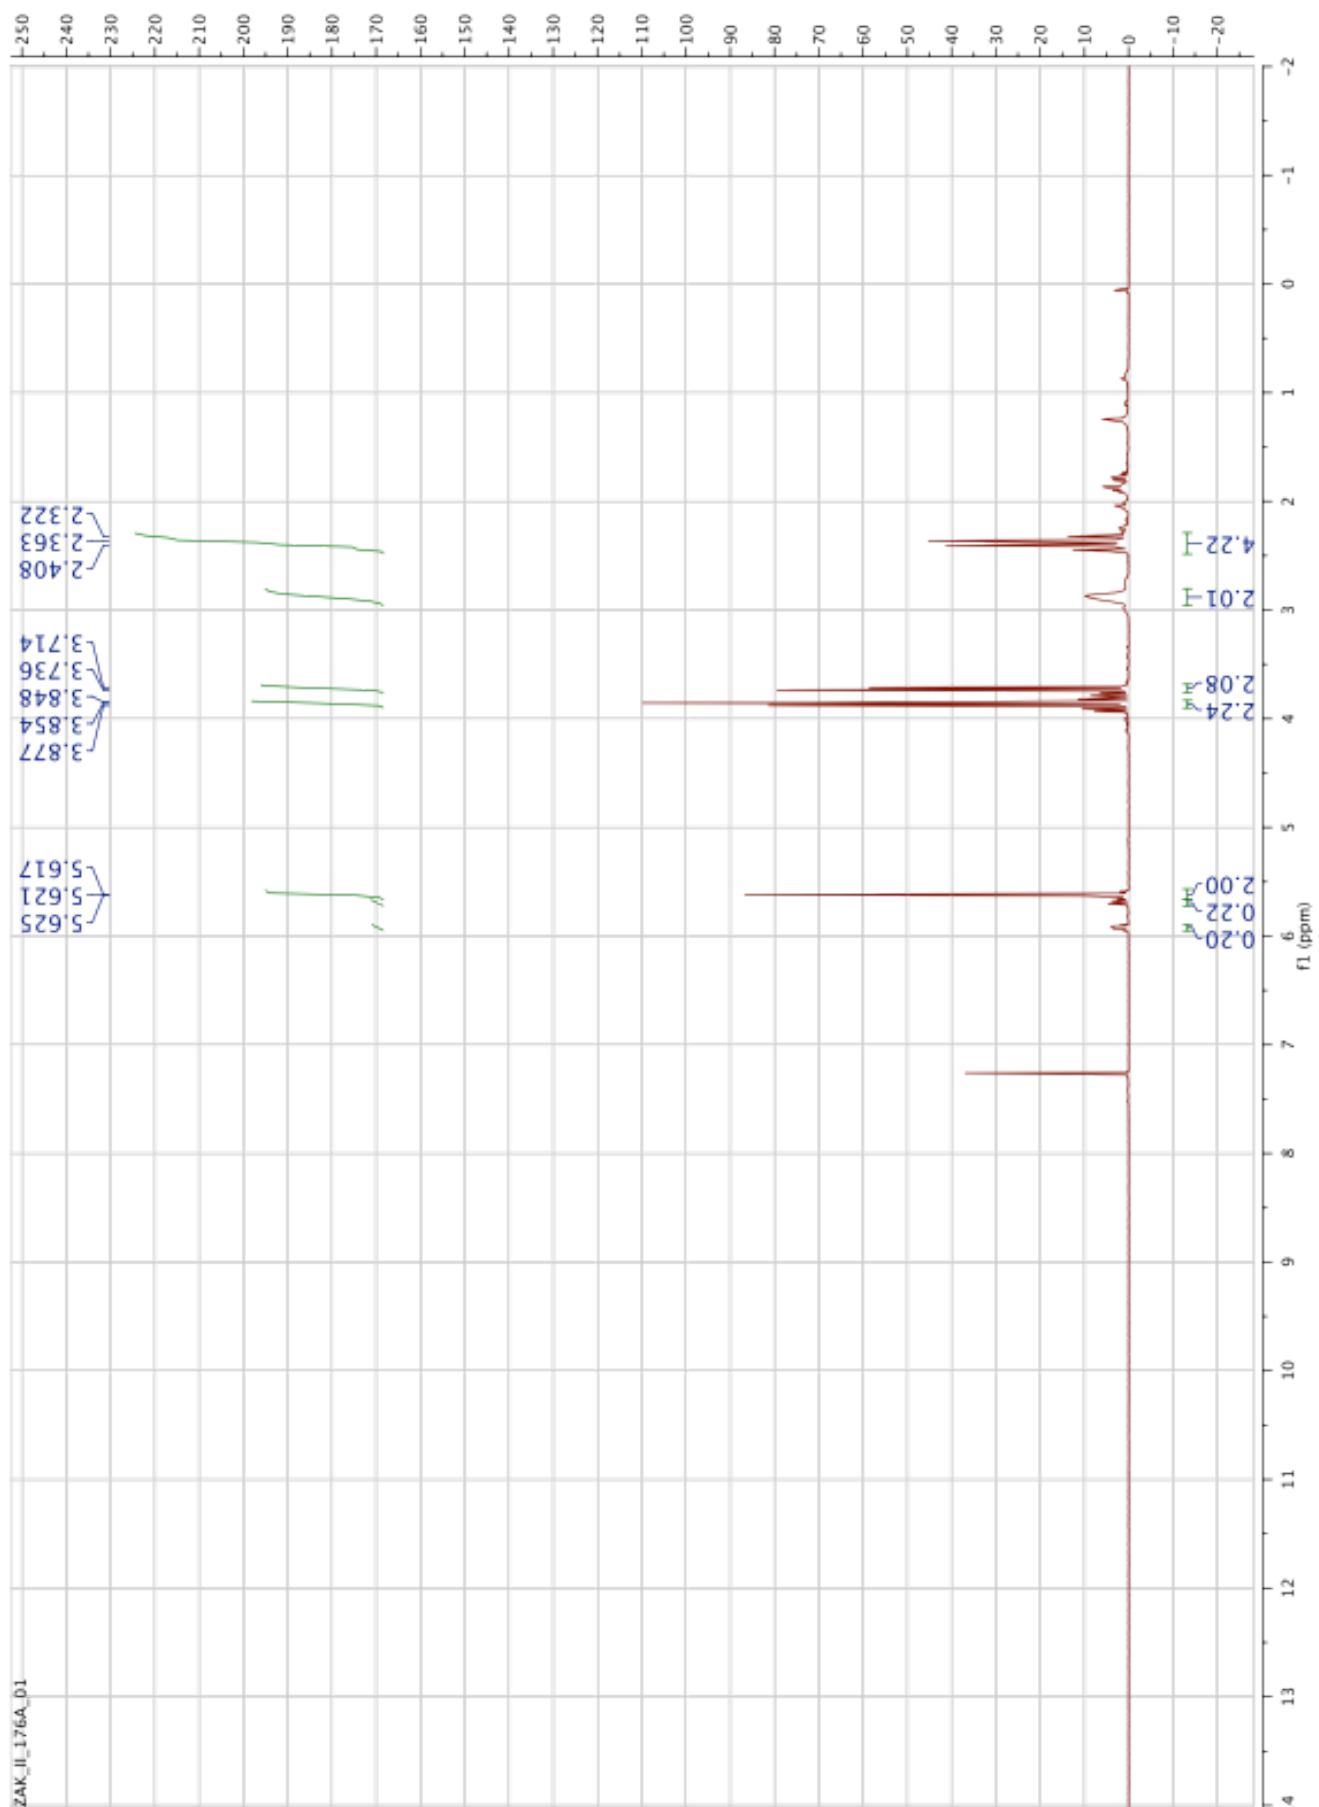

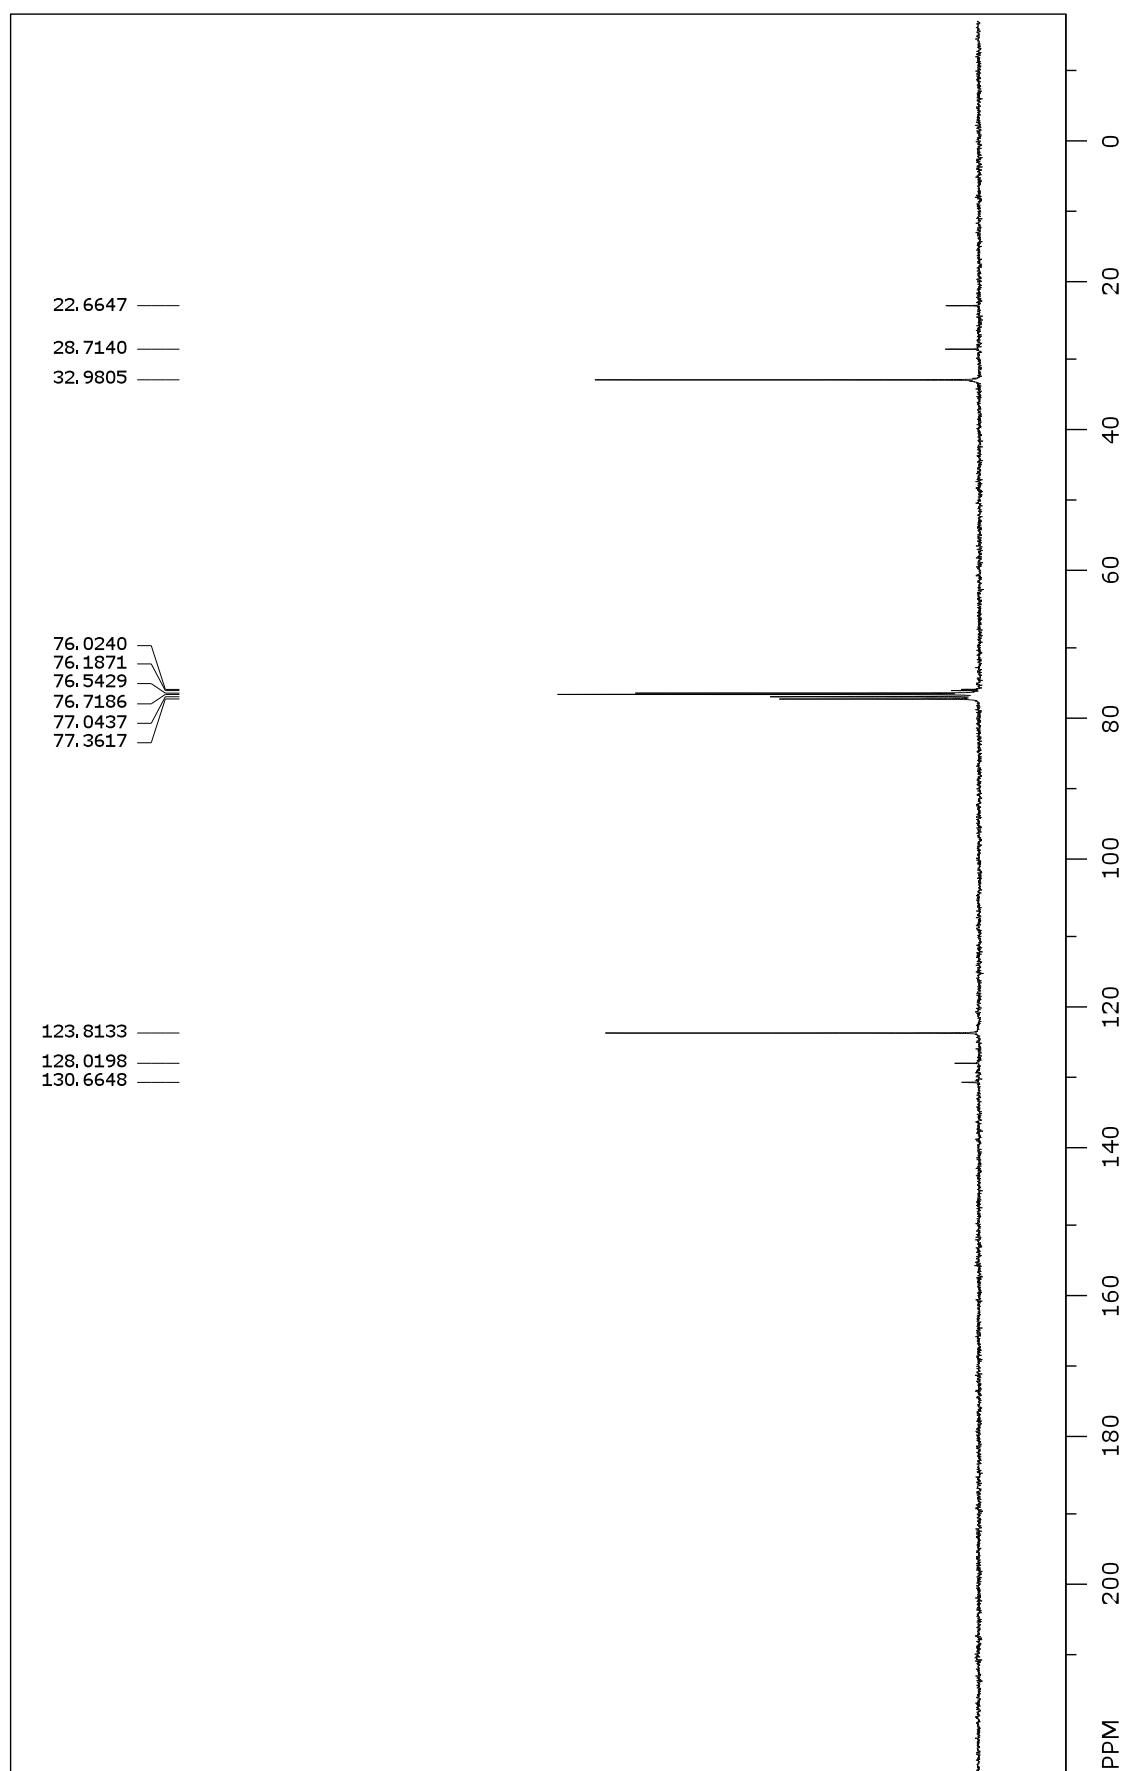

**(3aR\*,7aS\*)-5-methyl-1,3,3a,4,7,7a-hexahydroisobenzofuran-3a-7a-diol (**3n**) and (3aS\*,7aR\*)-5-methyl-1,3,3a,4,5,7a-hexahydroisobenzofuran-3a-7a-diol (*iso*-**3n**)**

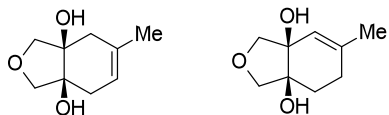

To an oven dried pressure tube equipped with a stir bar and sealed with a septum under argon was added  $\text{Ru}_3(\text{CO})_{12}$  (3.8 mg, 0.006 mmol, 2 mol%) and dppp (7.4 mg, 0.018 mmol, 6 mol%). The vessel was purged with argon, and toluene (0.15 mL, 2.0 M) was added via syringe. Tetrahydrofuran diol **1e** (31.2 mg, 0.30 mmol, 100 mol%) was then added. Freshly distilled isoprene **2b** (0.15 mL, 1.5 mmol, 500 mol%) was added via syringe. The septum was replaced with a screw cap, and the reaction was heated to 130 °C. The reaction was allowed to stir for 8 hours. The volatiles were removed via rotary evaporation under reduced pressure, and the residue was subjected to flash column chromatography ( $\text{SiO}_2$ : 1:1, ethyl acetate: hexanes) to furnish the cycloadduct **3n** (34.6 mg, 0.203 mmol, 75% yield, 14:1 rr) as a colorless solid.

**TLC ( $\text{SiO}_2$ ):**  $R_f$  = 0.14 (2:3, ethyl acetate: hexanes).

**$^1\text{H}$  NMR (400 MHz,  $\text{CDCl}_3$ , major isomer):**  $\delta$  5.30 (m, 1H), 3.85 (m, 2H), 3.69 (m, 2H), 2.88 (br, 2H), 2.44-2.19 (m, 4H), 1.69 (m, 3H) ppm.

**$^{13}\text{C}$  NMR (100 MHz,  $\text{CDCl}_3$ , major isomer):**  $\delta$  131.5, 117.8, 76.8, 76.7, 76.6, 37.9, 33.2, 23.1 ppm.

**LRMS ( $\text{CI}^+$ ):** Calculated for  $\text{C}_{19}\text{H}_{14}\text{NaO}_3$  ( $M+\text{Na}$ ) 193; Found 193.

**FTIR (neat):**  $\nu$  3350, 2886, 1110, 1029, 1010  $\text{cm}^{-1}$ .

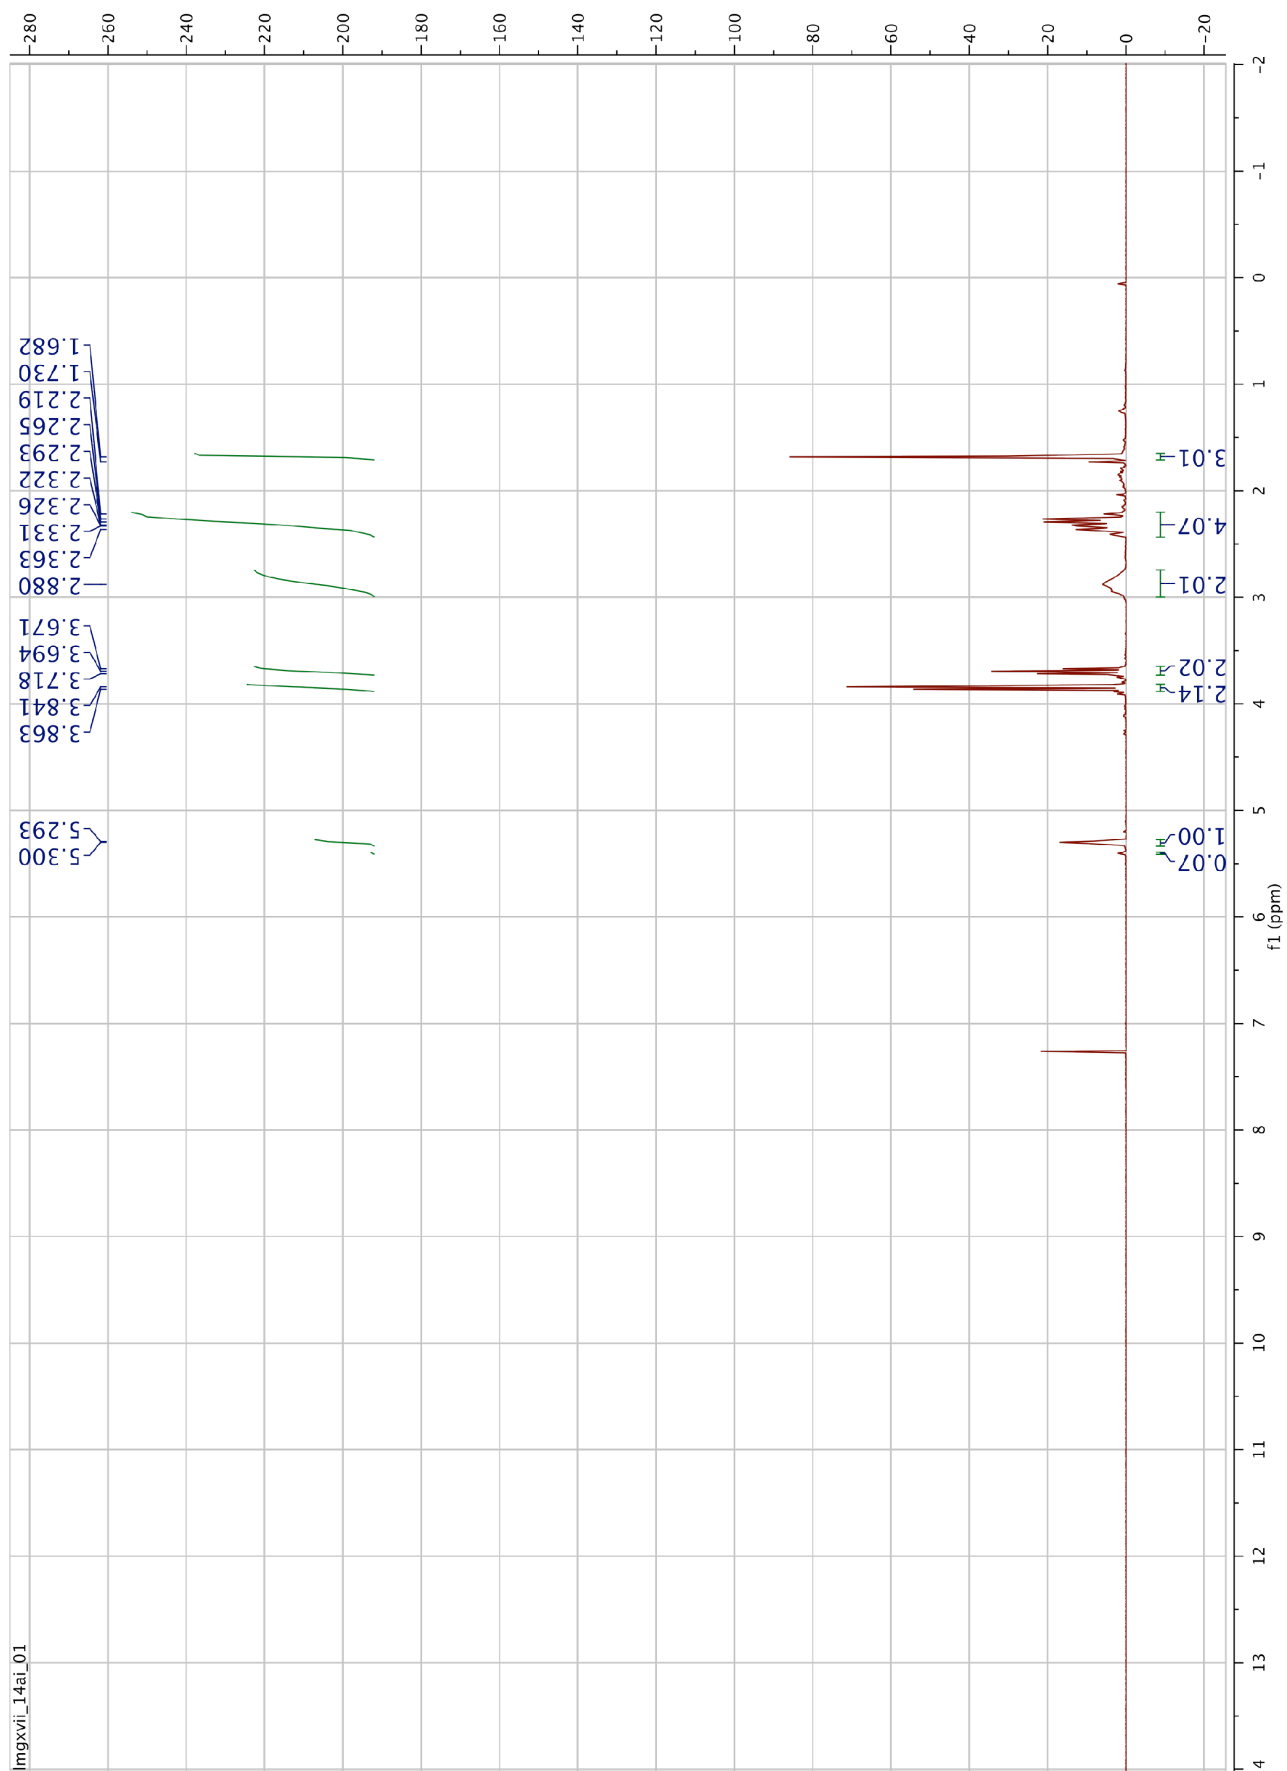

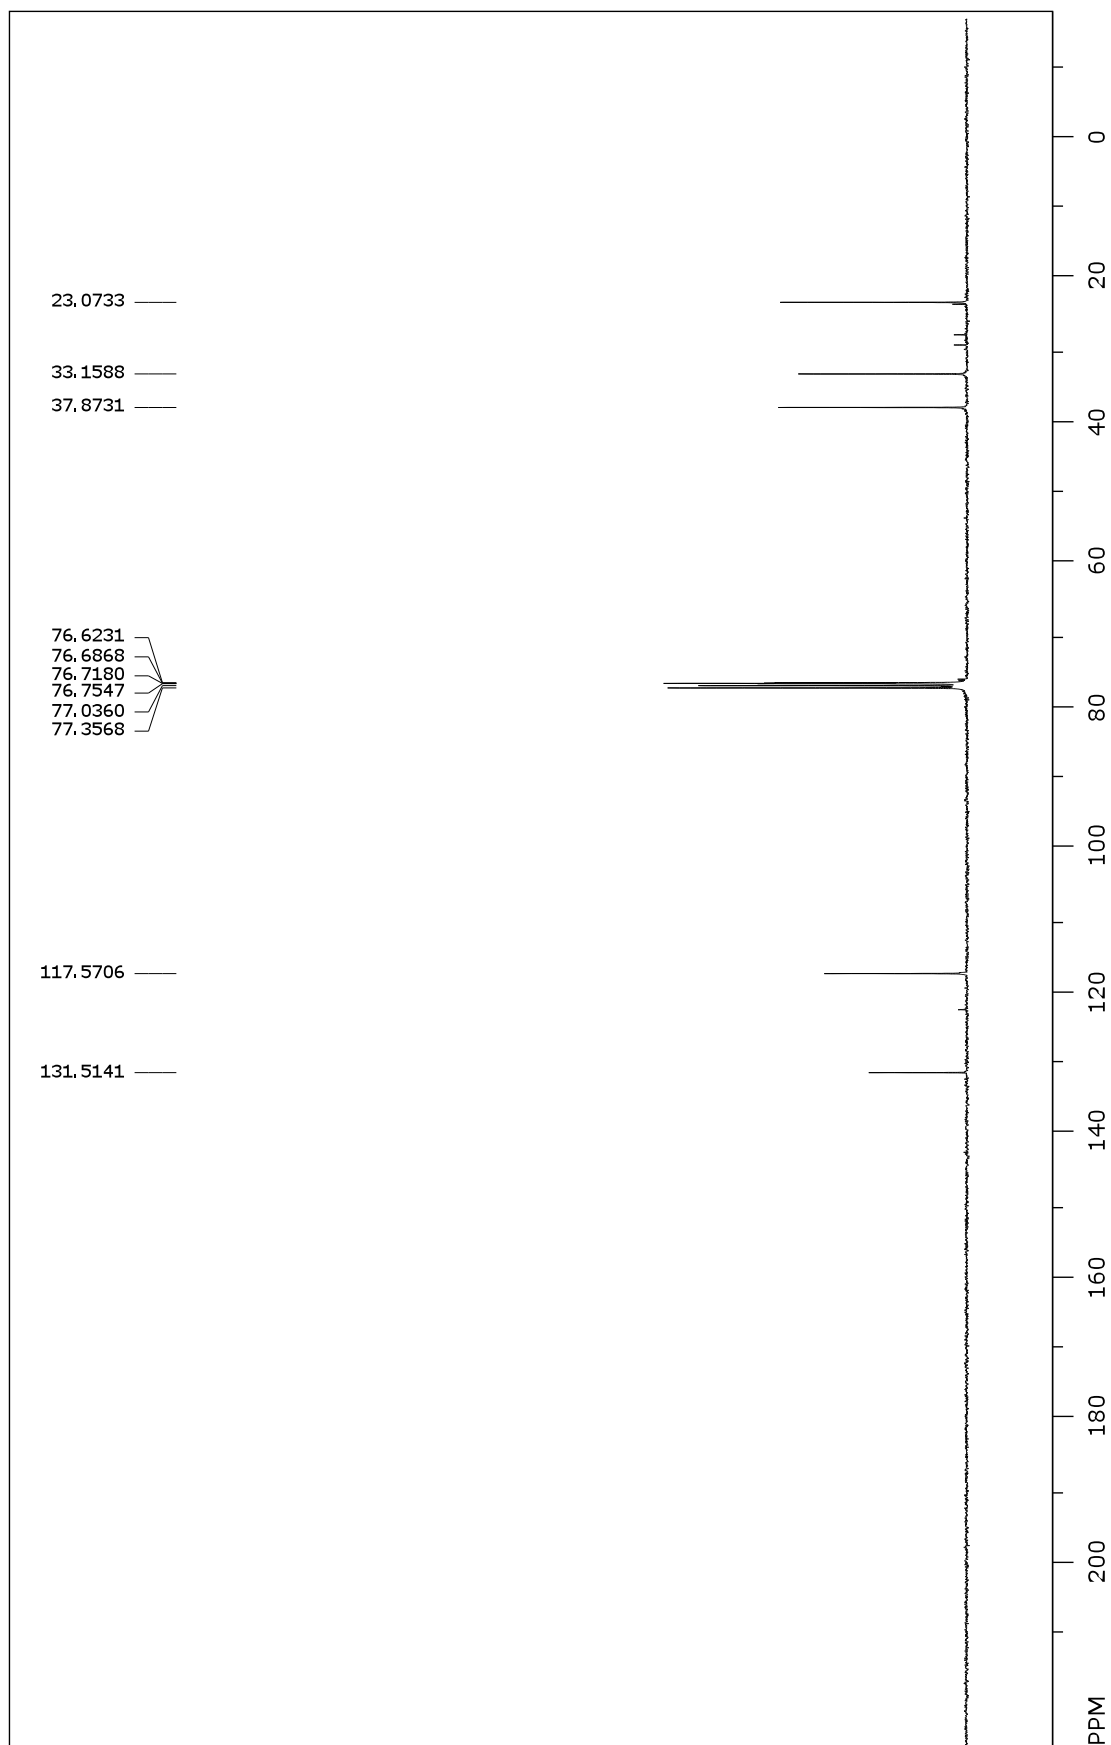

**(3a*R*\*,7a*S*\*)-5-(4-methylpent-3-en-1-yl)-1,3,3a,4,7,7a-hexahydroisobenzofuran-3a,7a-diol (3o)**

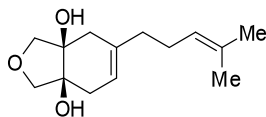

To an oven dried pressure tube equipped with a stir bar and sealed with a septum under argon was added  $\text{Ru}_3(\text{CO})_{12}$  (3.8 mg, 0.006 mmol, 2 mol%) and dppp (7.4 mg, 0.018 mmol, 6 mol%). The vessel was purged with argon, and toluene (0.15 mL, 2.0 M) was added via syringe. Tetrahydrofuran diol **1e** (31.2 mg, 0.30 mmol, 100 mol%) was then added. Myrcene **2c** (0.23 mL, 1.2 mmol, 400 mol%) was added via syringe. The septum was replaced with a screw cap, and the reaction was heated to 130 °C. The reaction was allowed to stir for 48 hours. The volatiles were removed via rotary evaporation under reduced pressure, and the residue was subjected to flash column chromatography ( $\text{SiO}_2$ : 1:19, Ethyl acetate: hexanes) to furnish the cycloadduct **3o** (63.7 mg, 0.267 mmol, 89% yield) as a colorless oil.

**TLC ( $\text{SiO}_2$ ):**  $R_f$  = 0.25 (1:1, ethyl acetate: hexanes).

**$^1\text{H}$  NMR (400 MHz,  $\text{CDCl}_3$ ):**  $\delta$  5.33 (m, 1H), 5.06 (m, 1H), 3.85 (d, 2H,  $J$  = 9 Hz), 3.68 (t, 2H,  $J$  = 9Hz), 2.78 (br s, 2H), 2.44-2.20 (m, 4H), 2.12-1.97 (m, 5H), 1.67 (m, 3H), 1.59 (s, 3H) ppm.

**$^{13}\text{C}$  NMR (100 MHz,  $\text{CDCl}_3$ ):**  $\delta$  135.5, 132.0, 123.7, 117.5, 77.6, 77.1, 77.01, 77.96, 36.9, 36.4, 33.3, 26.0, 25.7, 17.7 ppm.

**LRMS ( $\text{CI}^+$ ):** Calculated for  $\text{C}_{14}\text{H}_{22}\text{NaO}_3$  ( $M+\text{Na}$ ) 261; Found 261.

**FTIR (neat):**  $\nu$  3385, 2914, 1376, 1099, 1033, 901  $\text{cm}^{-1}$ .

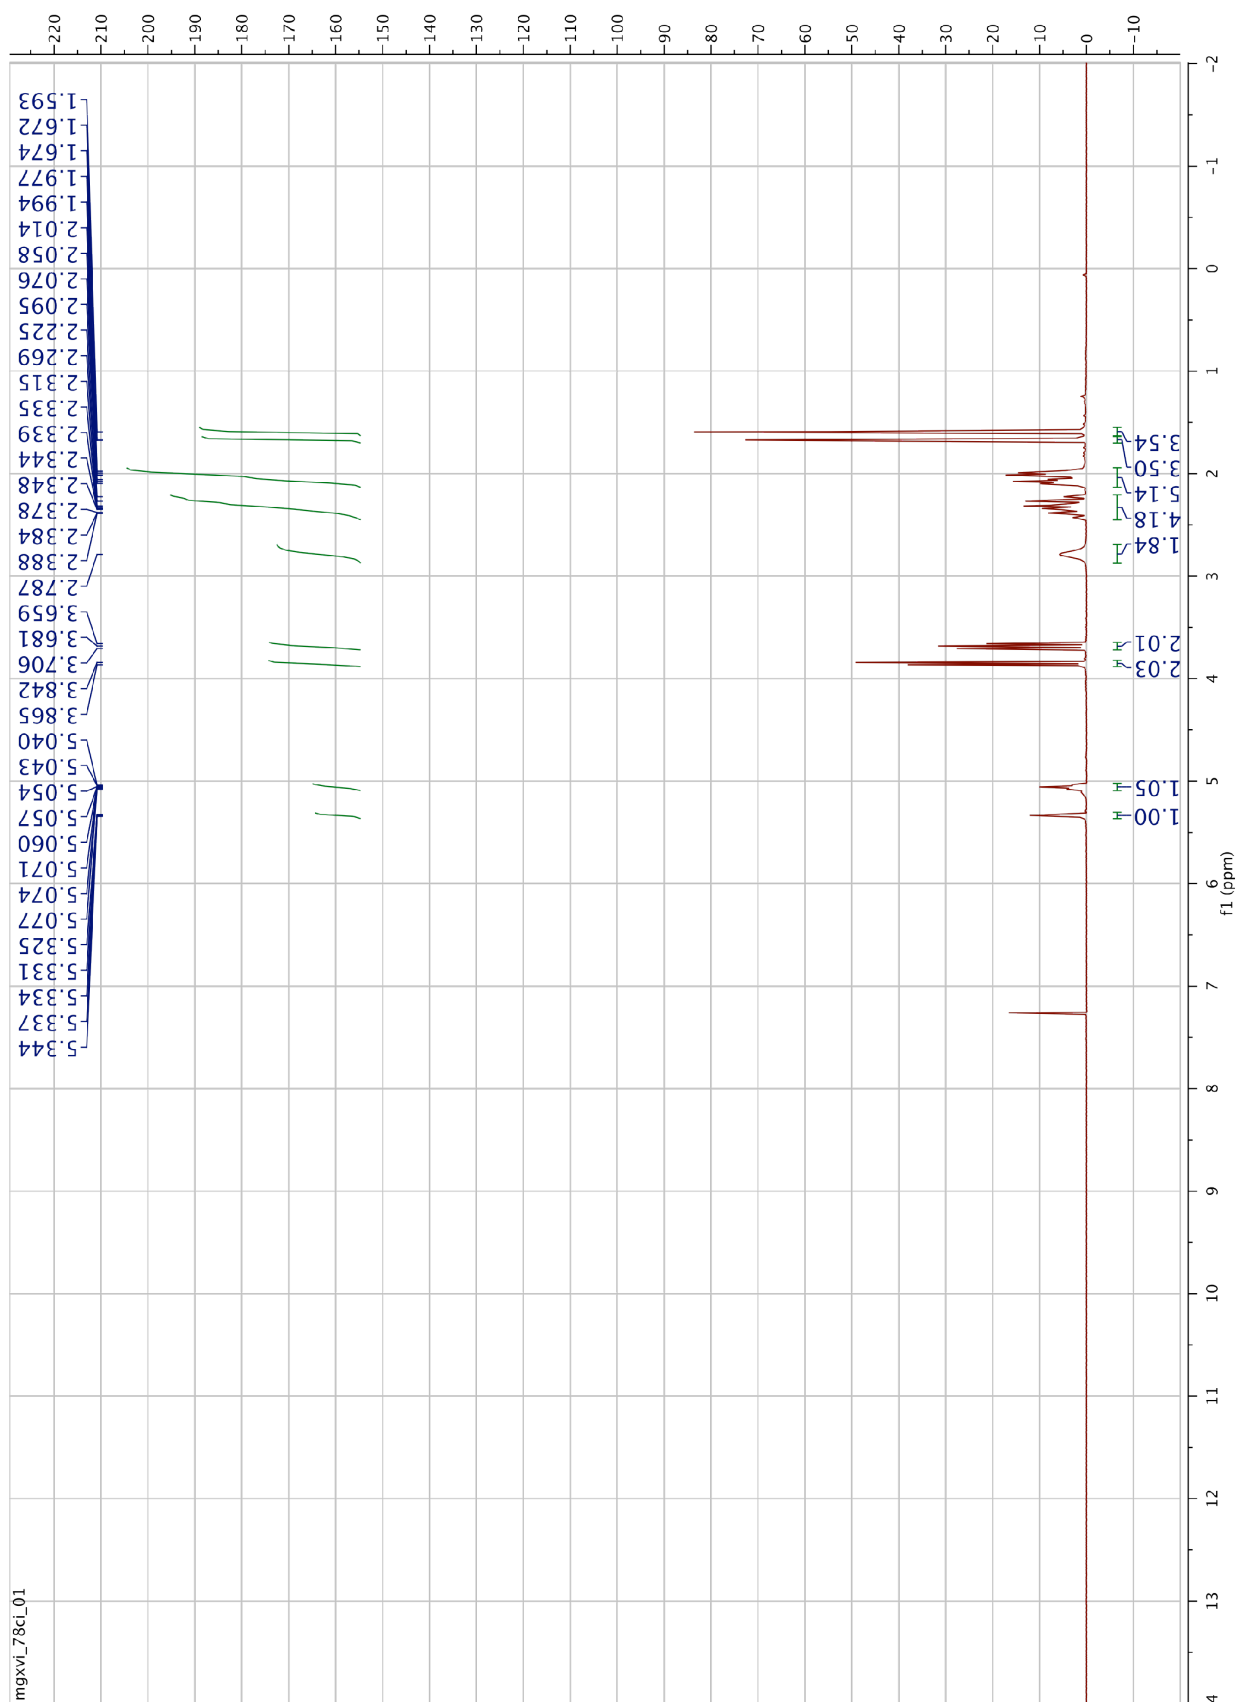

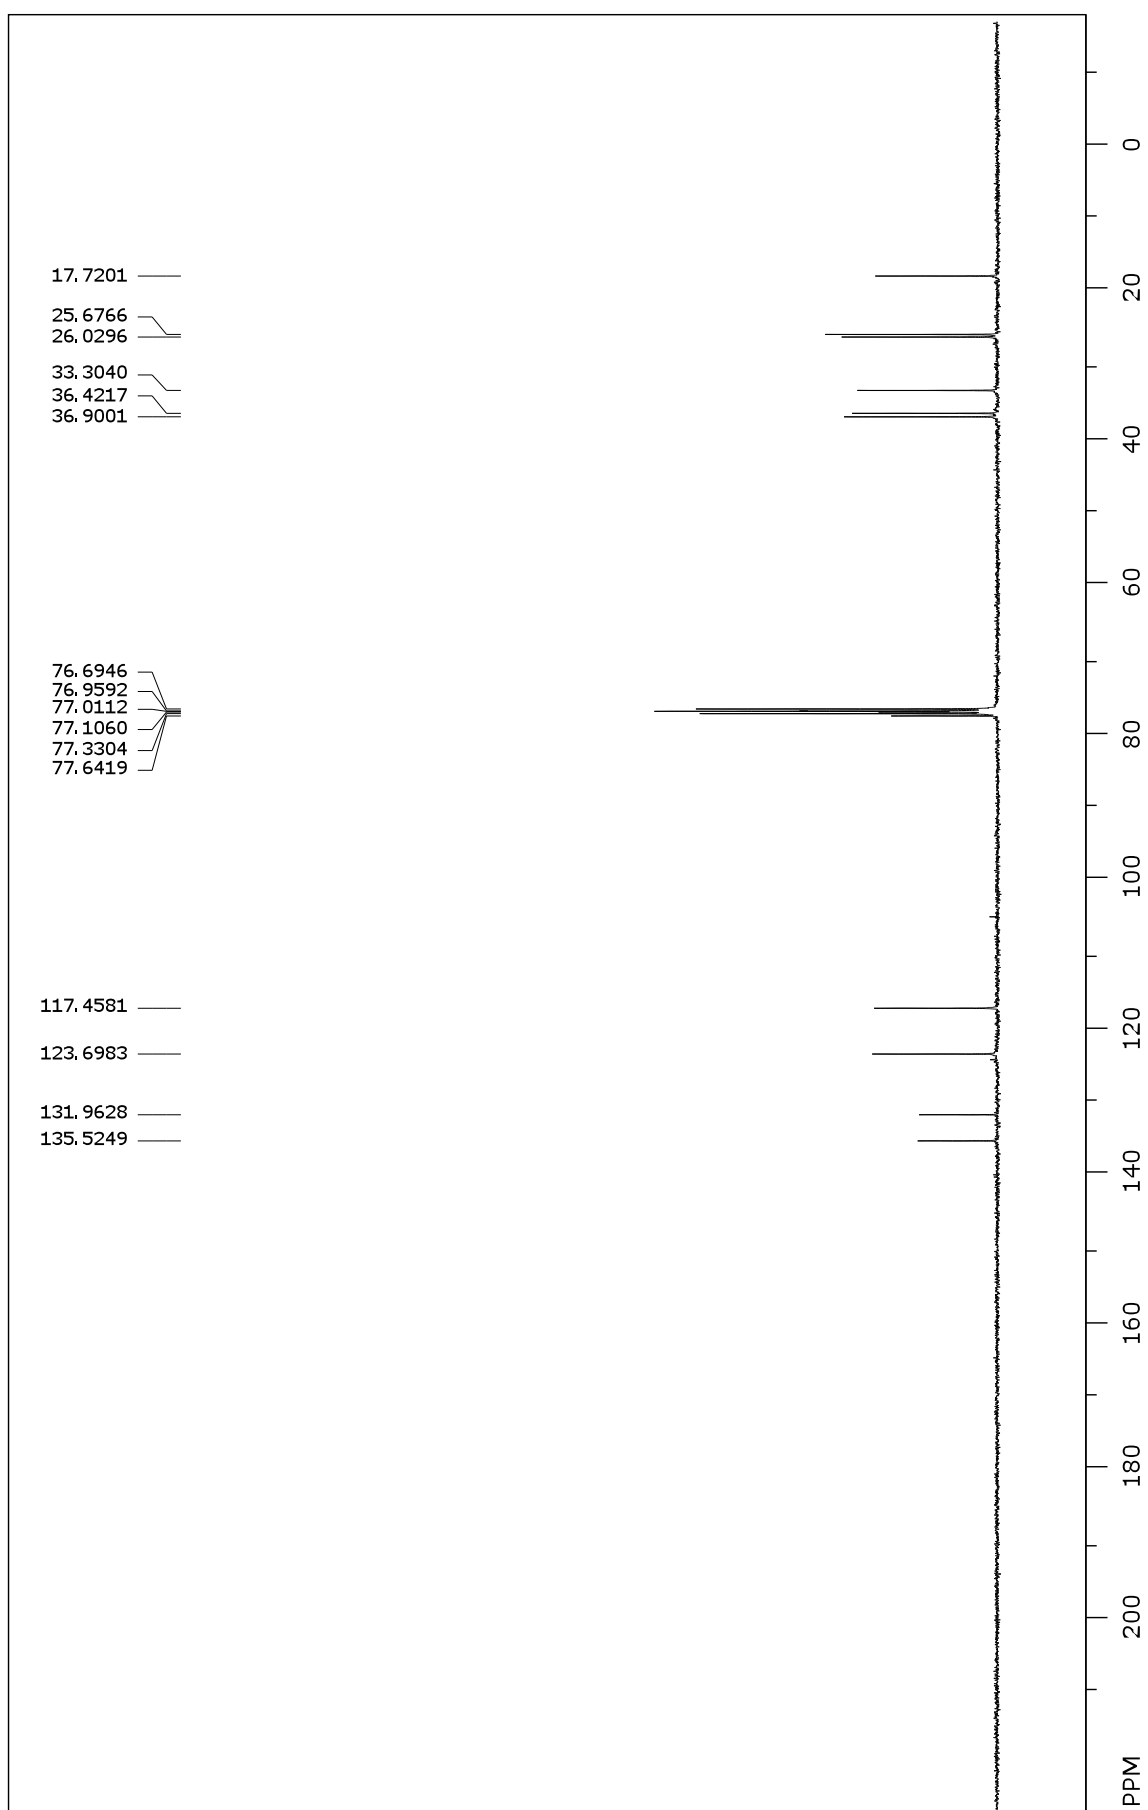



**1-(((*tert*-butyldimethylsilyloxy)methyl)-3,4,4a,5,8,8a-hexahydro-1*H*-isochromene-4a,8a-diol (3p)**

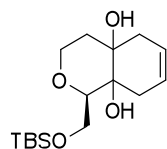

To an oven dried sealed tube equipped with a stir bar and sealed with a septum under argon was added  $\text{Ru}_3(\text{CO})_{12}$  (3.8 mg, 0.006 mmol, 2 mol%), dppp (7.4 mg, 0.018 mmol, 6 mol%) and diol **1f** (78.7 mg, 0.3 mmol, 100 mol%). The pressure tube was purged with argon and toluene (0.15 mL, 2.0 M) was added via syringe, followed by freshly condensed butadiene **2a** (0.13 mL, 1.5 mmol, 500 mol%) at  $-78^\circ\text{C}$ . The septum was replaced with a screw cap and the reaction was heated to  $130^\circ\text{C}$ . The reaction was allowed to stir for 48 hours. The volatiles were removed via rotary evaporation under reduced pressure, and the residue was subjected to flash column chromatography ( $\text{SiO}_2$ : 1:19, ethyl acetate: hexanes) to furnish cycloadducts **3p** (90.7 mg, 0.288 mmol, 96% yield, 1:1 dr) as a colorless oil.

The two diastereomers could be separated via column chromatography and were characterized separately.

**(1*R*,4*aR*,8*aS*)-1-(((*tert*-butyldimethylsilyloxy)methyl)-3,4,4*a*,5,8,8*a*-hexahydro-1*H*-isochromene-4*a*,8*a*-diol (3p)**

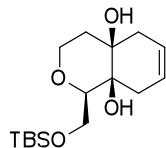

**TLC (SiO<sub>2</sub>)**: R<sub>f</sub> = 0.28 (2:3, ethyl acetate: hexanes).

**<sup>1</sup>H NMR (400 MHz, CDCl<sub>3</sub>)**: δ 5.67-5.56 (m, 2H), 4.24 (br s, 1H), 3.96-3.88 (m, 2H), 3.81 (dd, 1H, *J* = 5.5, 9.8 Hz), 3.73-3.66 (m, 2H), 2.71 (d, 1H, *J* = 2.5 Hz), 2.64 (m, 1H), 2.46 (m, 1H), 2.18 (m, 1H), 2.01 (m, 1H), 1.86 (m, 1H), 1.43 (m, 1H), 0.90 (s, 9H), 0.11 (s, 6H) ppm.

**<sup>13</sup>C NMR (100 MHz, CDCl<sub>3</sub>)**: δ 124.3, 122.6, 73.1, 72.6, 69.5, 63.4, 62.7, 37.3, 33.6, 25.8, 18.0, -5.71, -5.75 ppm.

**LRMS (CI<sup>+</sup>)**: Calculated for C<sub>16</sub>H<sub>29</sub>O<sub>3</sub>Si<sup>+</sup> (M-OH) 297; Found 297.

**FTIR (neat)**: ν 3467, 2928, 1253, 1093, 833, 777, 661 cm<sup>-1</sup>.

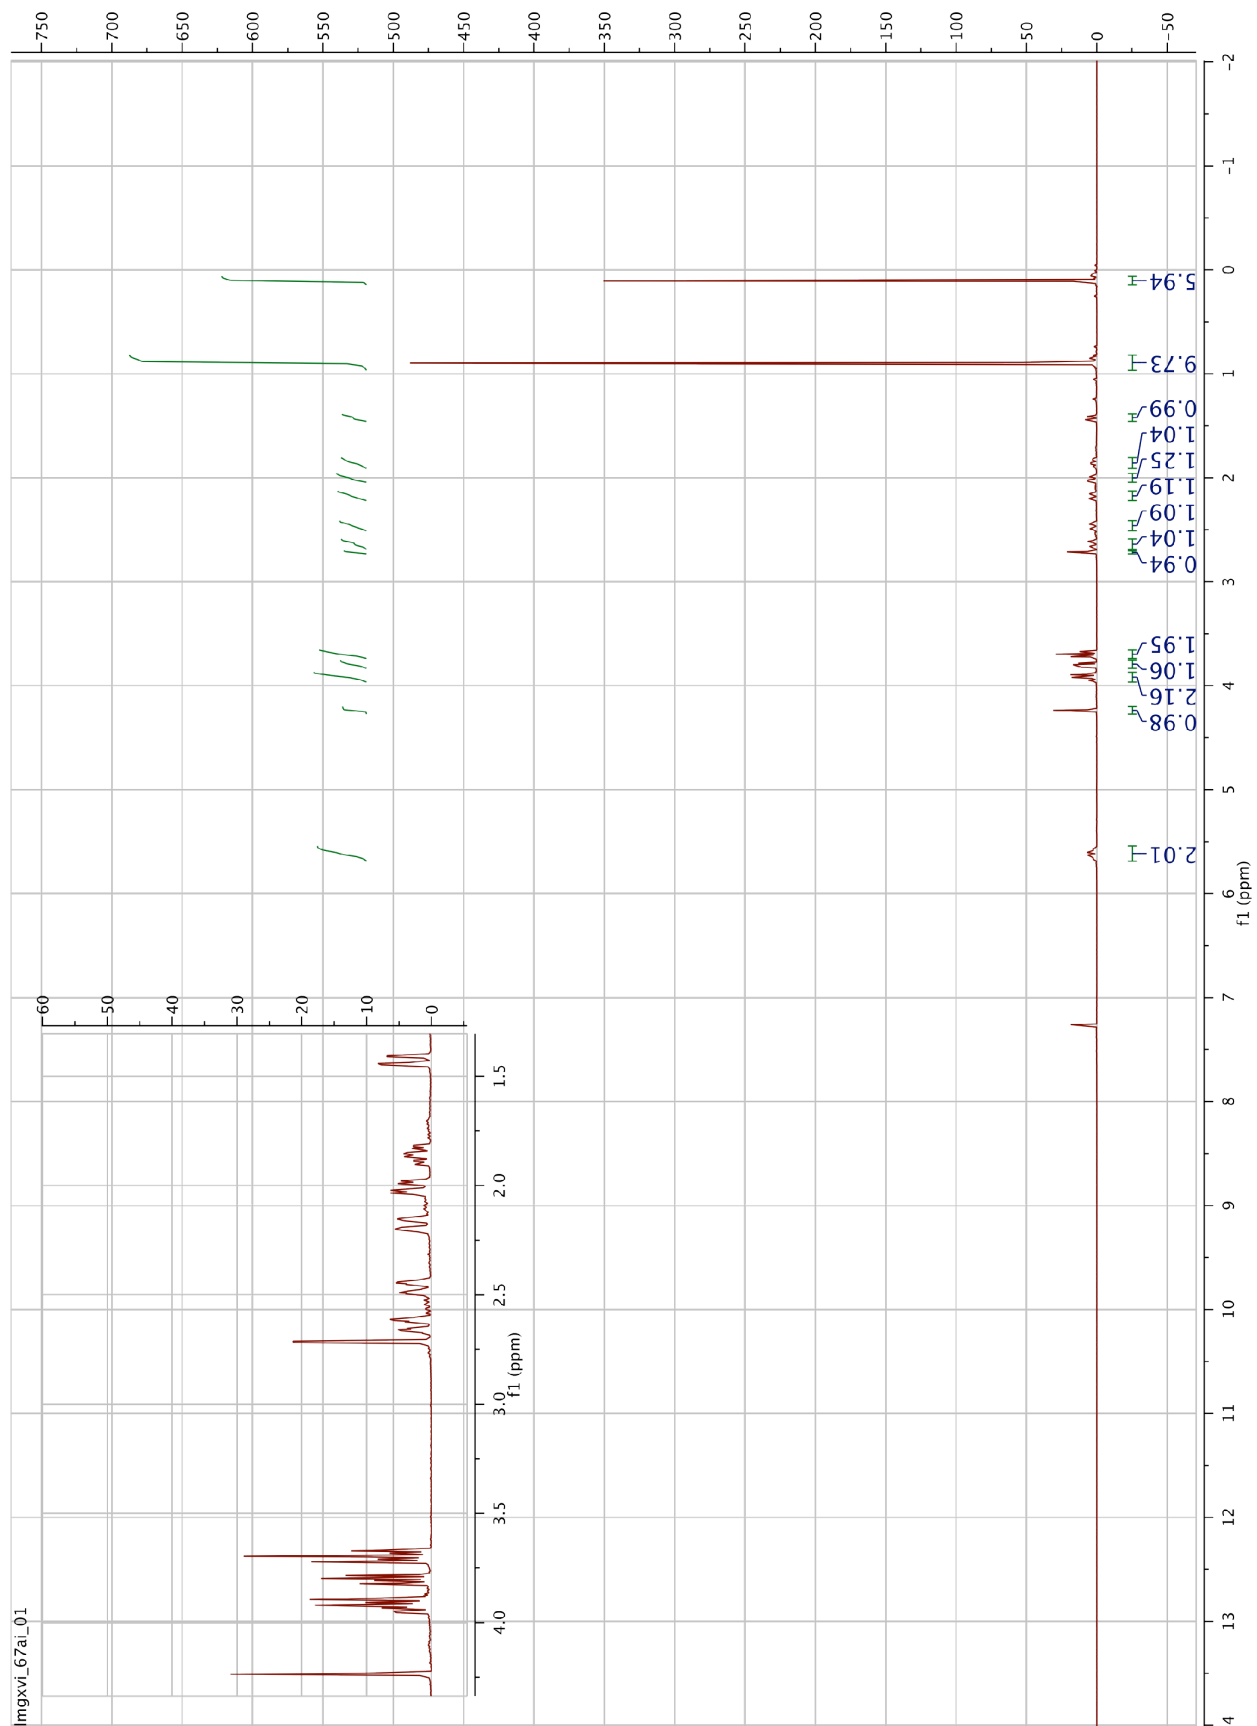

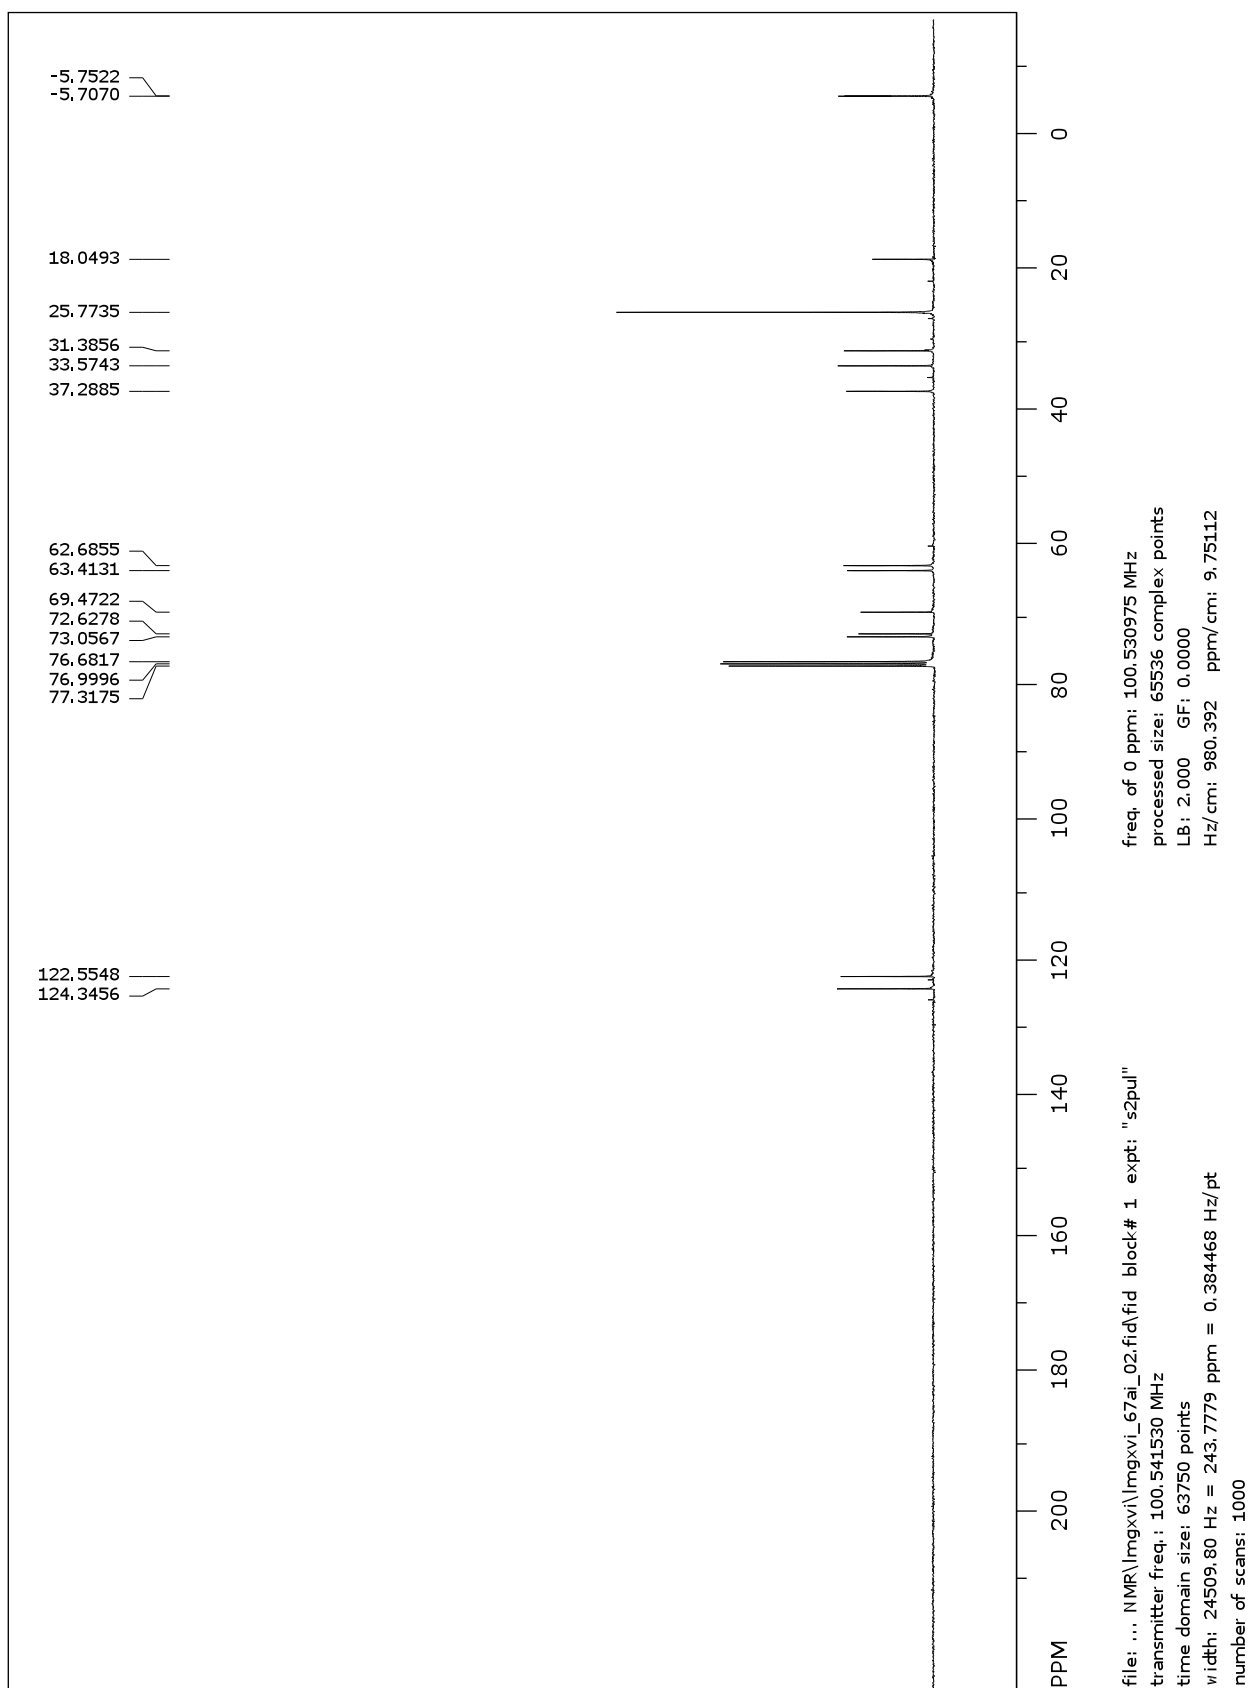

NOESY spectrum for **3p**- *syn, syn*

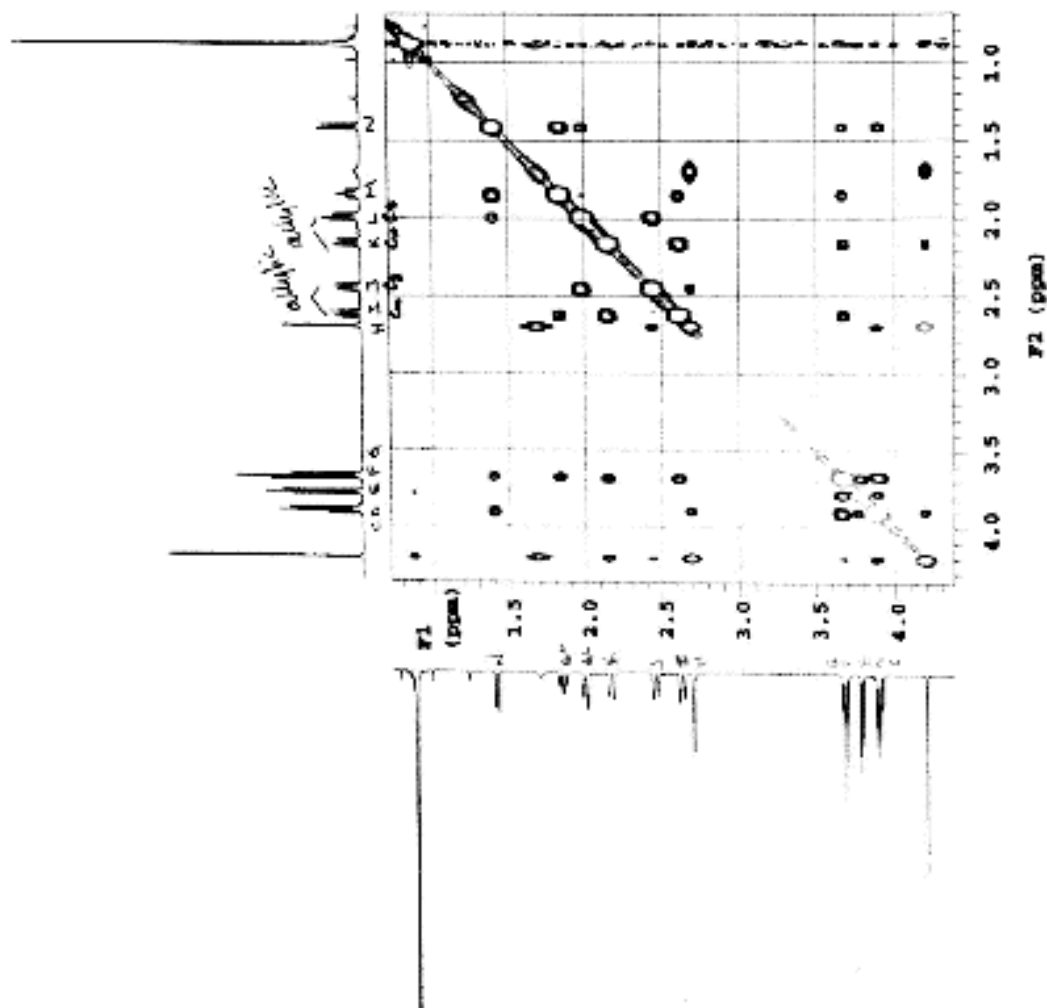

100001\_0704  
 Sample Name:  
 Data Collected on:  
 Instrument: spect  
 Sample directory:  
 Sample directory:  
 File: 100001\_0704  
 Pulse sequence: NOESY  
 Solvent: cdcl3  
 Data collected on: Mar 5 2014

**(1*R*,4*aS*,8*aR*)-1-(((*tert*-butyldimethylsilyloxy)methyl)-3,4,4*a*,5,8,8*a*-hexahydro-1*H*-isochromene-4*a*,8*a*-diol (3p)**

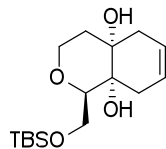

**TLC (SiO<sub>2</sub>)**: R<sub>f</sub> = 0.10 (2:3, ethyl acetate: hexanes).

**<sup>1</sup>H NMR (400 MHz, CDCl<sub>3</sub>)**: δ 5.63-5.50 (m, 2H), 3.98 (ddd, 1H, *J* = 1.8, 5.5, 12 Hz), 3.92 (dd, 1H, *J* = 3.5, 11 Hz), 3.86 (dd, 1H, *J* = 3.5, 11 Hz), 3.74 (br s, 1H), 3.56 (ddd, 1H, *J* = 2.8, 12, 12 Hz), 3.30 (dd, 1H, *J* = 3.6, 4 Hz), 2.77 (br s, 1H), 2.58-2.46 (m, 2H), 2.35-2.18 (m, 2H), 2.11 (ddd, 1H, *J* = 5.6, 6, 12 Hz), 1.45 (m, 1H), 0.89 (s, 9H), 0.082 (s, 3H), 0.077 (s, 3H) ppm.

**<sup>13</sup>C NMR (100 MHz, CDCl<sub>3</sub>)**: δ 123.9, 123.1, 77.4, 73.2, 70.0, 65.2, 63.7, 35.9, 34.1, 30.6, 25.8, 18.2, -5.52, -5.59 ppm.

**LRMS (CI<sup>+</sup>)**: Calculated for C<sub>16</sub>H<sub>29</sub>O<sub>3</sub>Si<sup>+</sup> (M-OH) 297; Found 297.

**FTIR (neat)**: ν 3467, 2928, 1472, 1101, 837, 777, 667 cm<sup>-1</sup>.

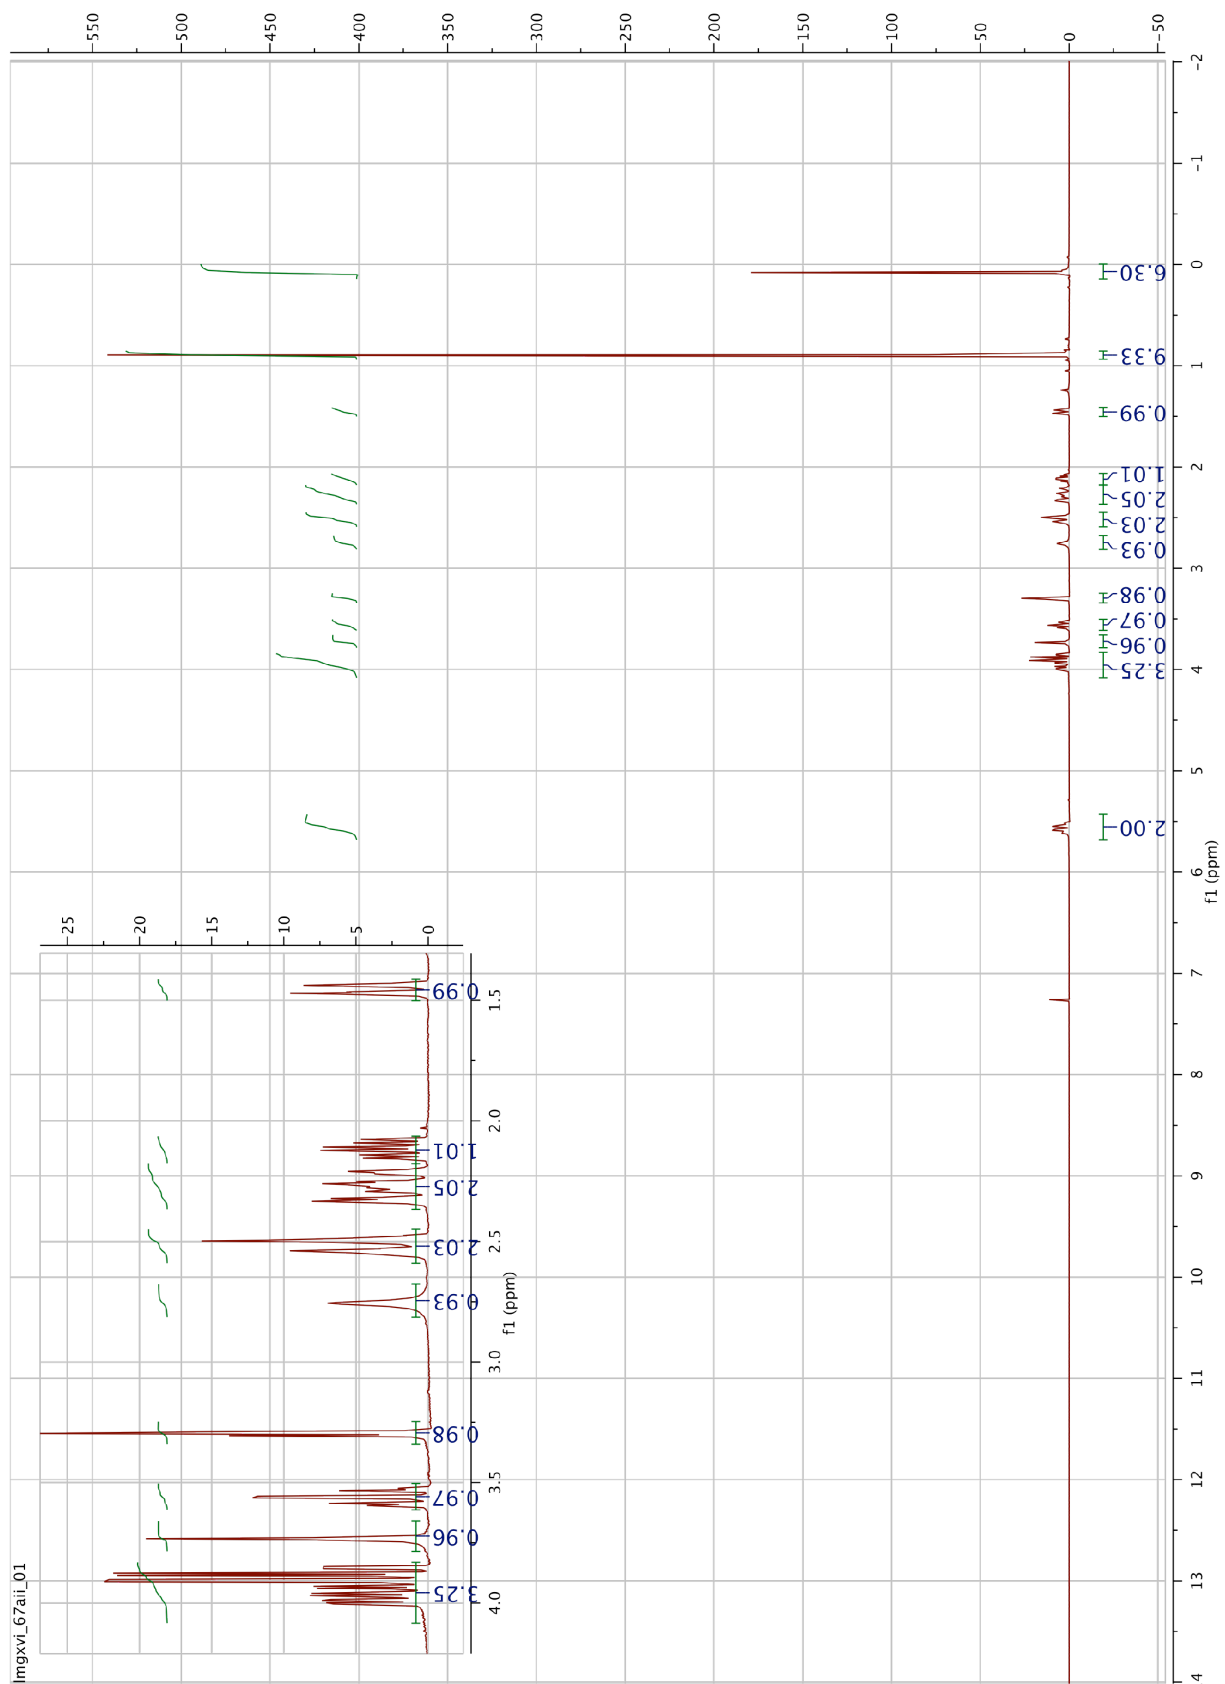

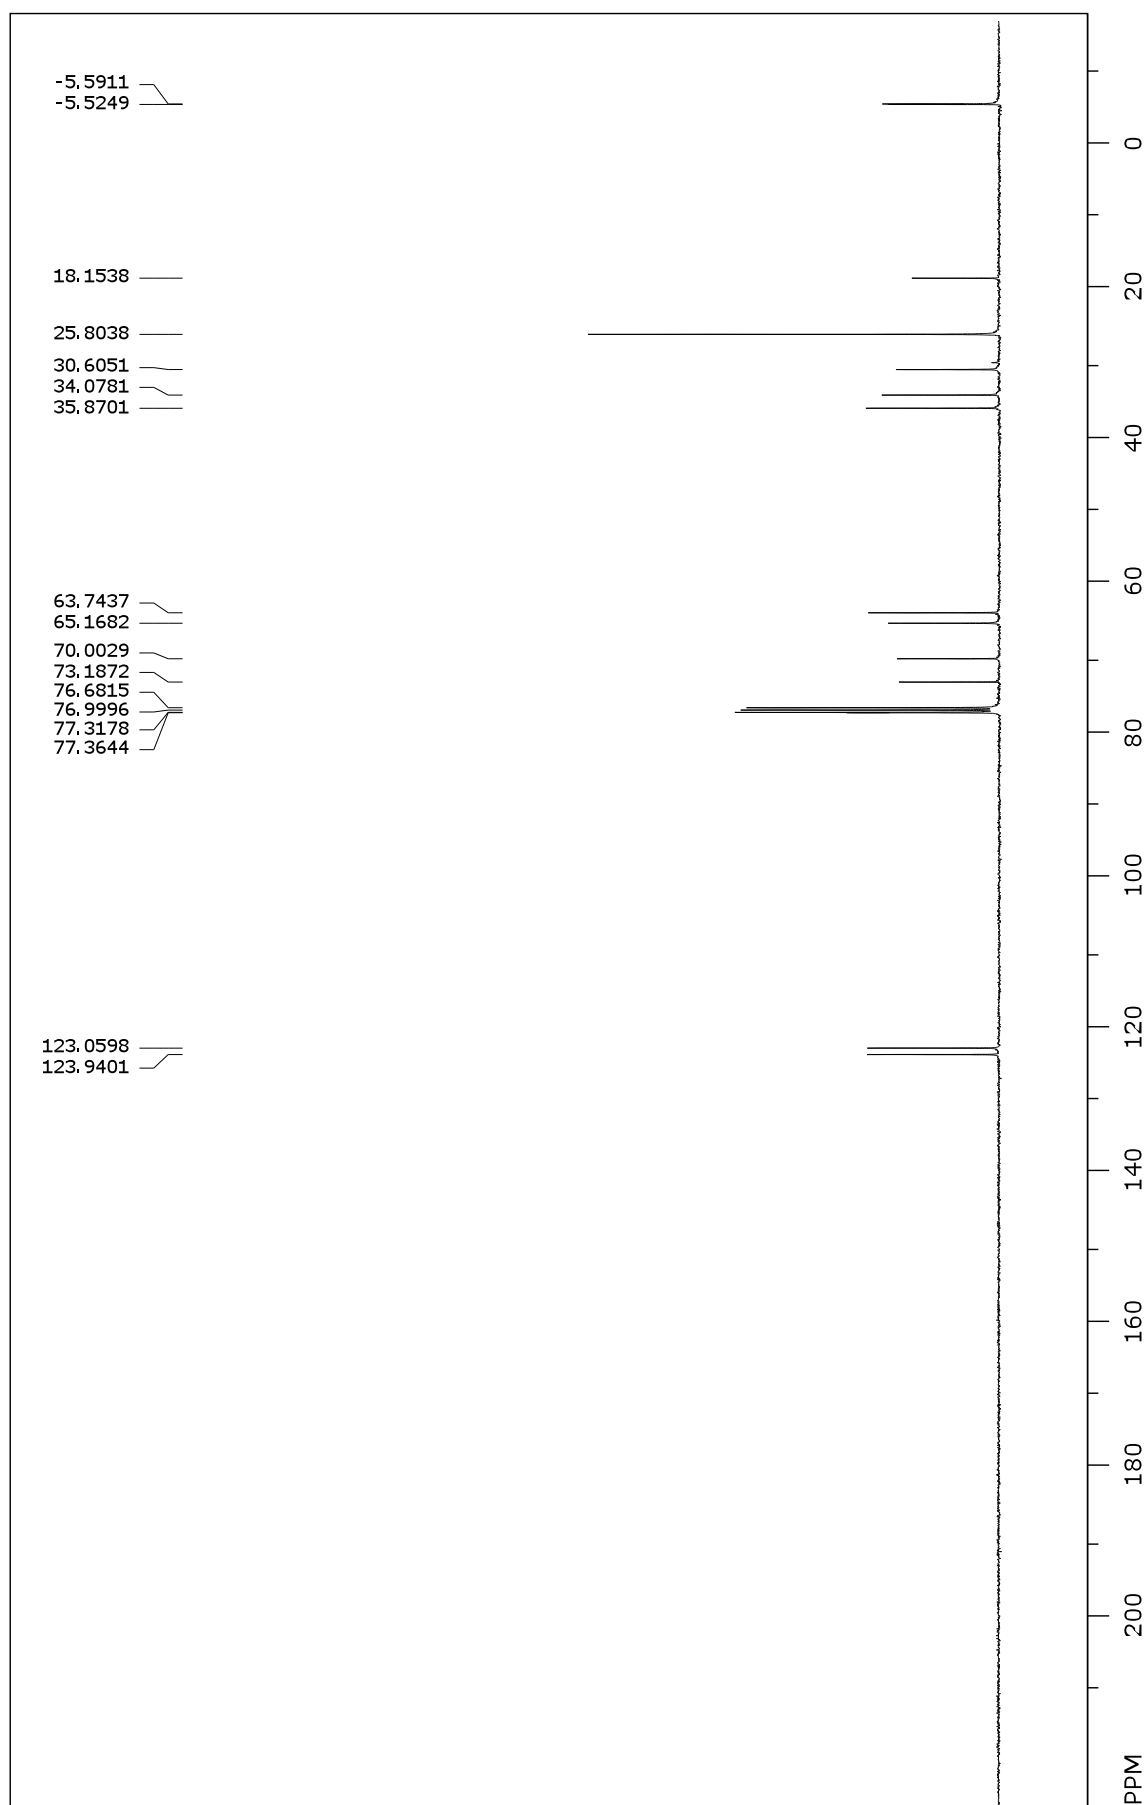



NOESY spectrum of **3p-anti, syn**

1mxvl\_67bil\_noesy

File: Noesy

Pulse Sequence: NOESY

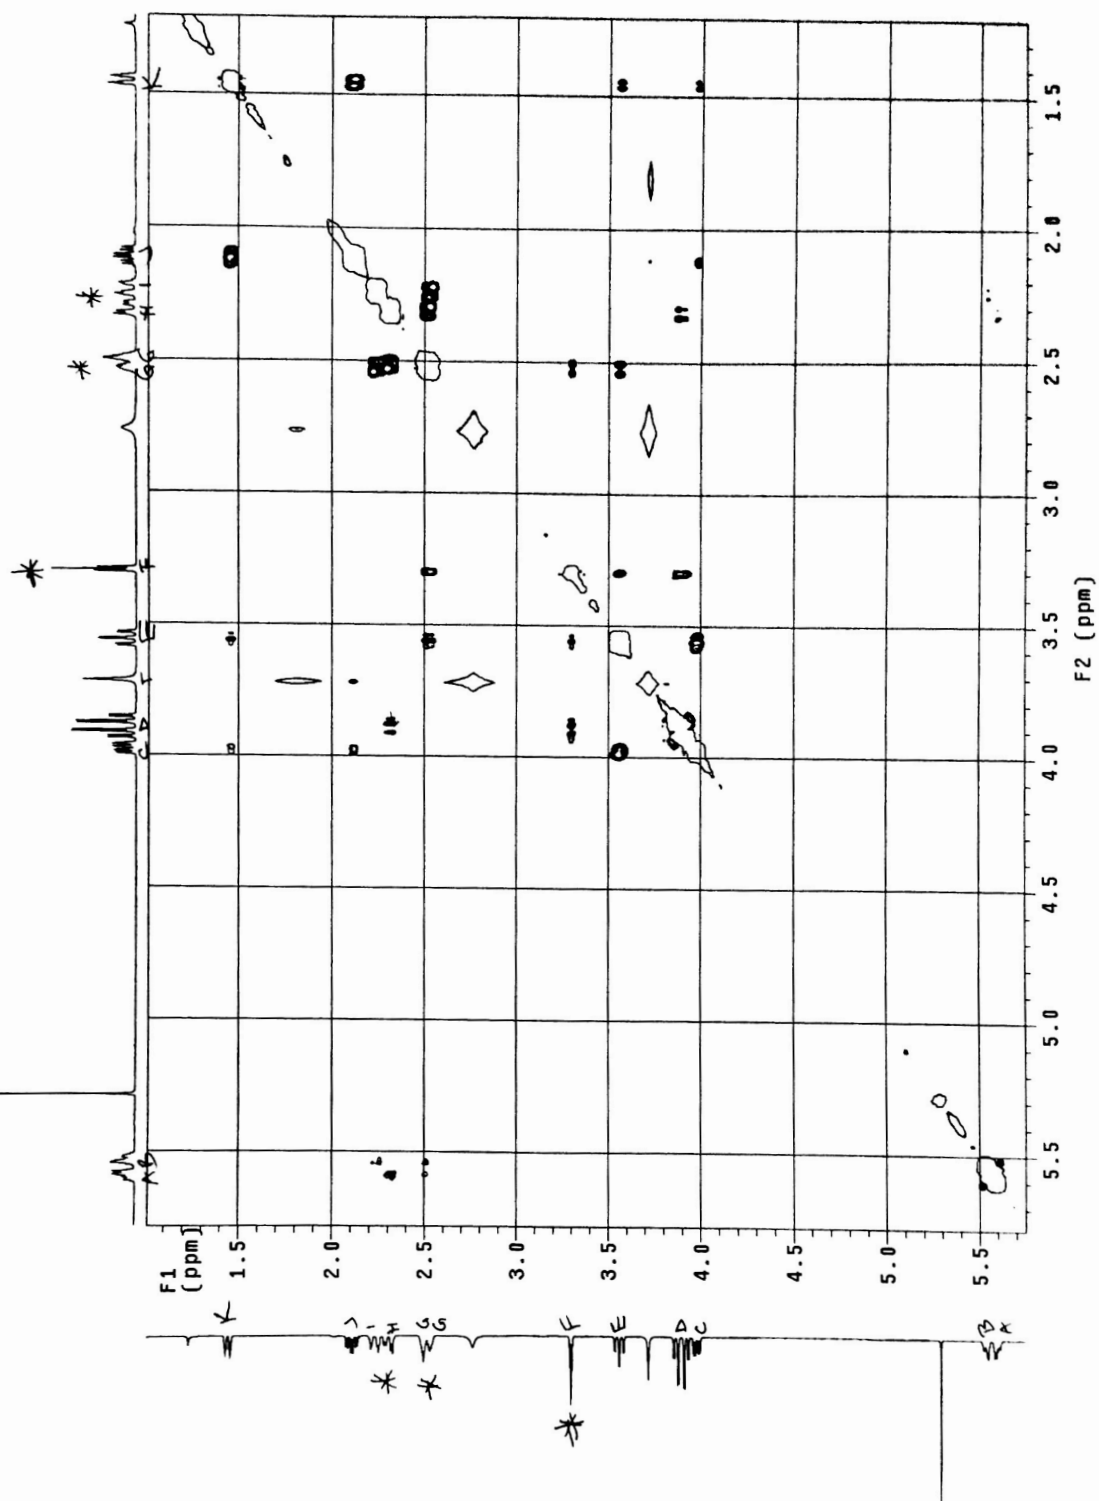

**(4a*S*,6*S*,10*bR*)-6-methoxy-2,2-dimethyl-4,4a,6,6a,7,10,10a,10b-octahydro-[1,3]-dioxino[5,4-*c*]isochromene-6a,10a-diol (**3q**)**

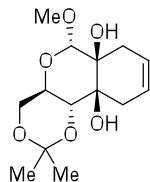

To an oven dried sealed tube equipped with a stir bar and sealed with a septum under argon was added  $\text{Ru}_3(\text{CO})_{12}$  (3.8 mg, 0.006 mmol, 2 mol%), dppp (7.4 mg, 0.018 mmol, 6 mol%), 3,5-dimethylbenzoic acid (4.5 mg, 0.03 mmol, 10 mol%) and diol **1g** (70.3 mg, 0.3 mmol, 100 mol%). The pressure tube was purged with argon and toluene (0.30 mL, 1.0 M) was added via syringe, followed by freshly condensed butadiene **2a** (0.13 mL, 1.5 mmol, 500 mol%) at  $-78^\circ\text{C}$ . The septum was replaced with a screw cap, and the reaction was heated to  $140^\circ\text{C}$ . The reaction was allowed to stir for 48 hours. The volatiles were removed via rotary evaporation under reduced pressure, and the residue was subjected to flash column chromatography ( $\text{SiO}_2$ : 1:19, ethyl acetate: hexanes) to provide the cycloadducts **3q** as colorless solid in 3.2:1 dr (41.8 mg, 0.1460 mmol, 48% yield).

The two diastereomers could be separated via column chromatography and the characterization of the major diastereomer is given below (stereochemistry and the ring junction was determined by X-ray crystallography).

**TLC ( $\text{SiO}_2$ ):** Rf = 0.27 (2:3, ethyl acetate: hexanes).

**$^1\text{H}$  NMR (400 MHz,  $\text{CDCl}_3$ ):**  $\delta$  5.61 (m, 2H), 4.44 (br s, 1H), 4.11 (d, 1H,  $J = 9$  Hz), 3.89-3.79 (m, 2H), 3.71-3.63 (m, 1H), 3.34 (s, 3H), 2.79 (br s, 1H), 2.69-2.61 (m, 1H), 2.33-2.22 (m, 4H), 1.53 (s, 3H), 1.43 (s, 3H) ppm.

**$^{13}\text{C}$  NMR (100 MHz,  $\text{CDCl}_3$ ):**  $\delta$  124.4, 122.4, 104.8, 99.9, 73.6, 72.8, 71.8, 63.4, 62.6, 55.8, 35.0, 30.4, 29.2, 19.1 ppm.

**LRMS (ESI<sup>+</sup>):** Calculated for  $\text{C}_{15}\text{H}_{22}\text{NaO}_5^+$  ( $\text{M}+\text{Na}^+$ ) 309; Found 309.

**FTIR (neat):** 3458, 2931, 1379, 1083, 1003, 973, 862, 656  $\text{cm}^{-1}$ .

**MP:** 162-165  $^\circ\text{C}$ .

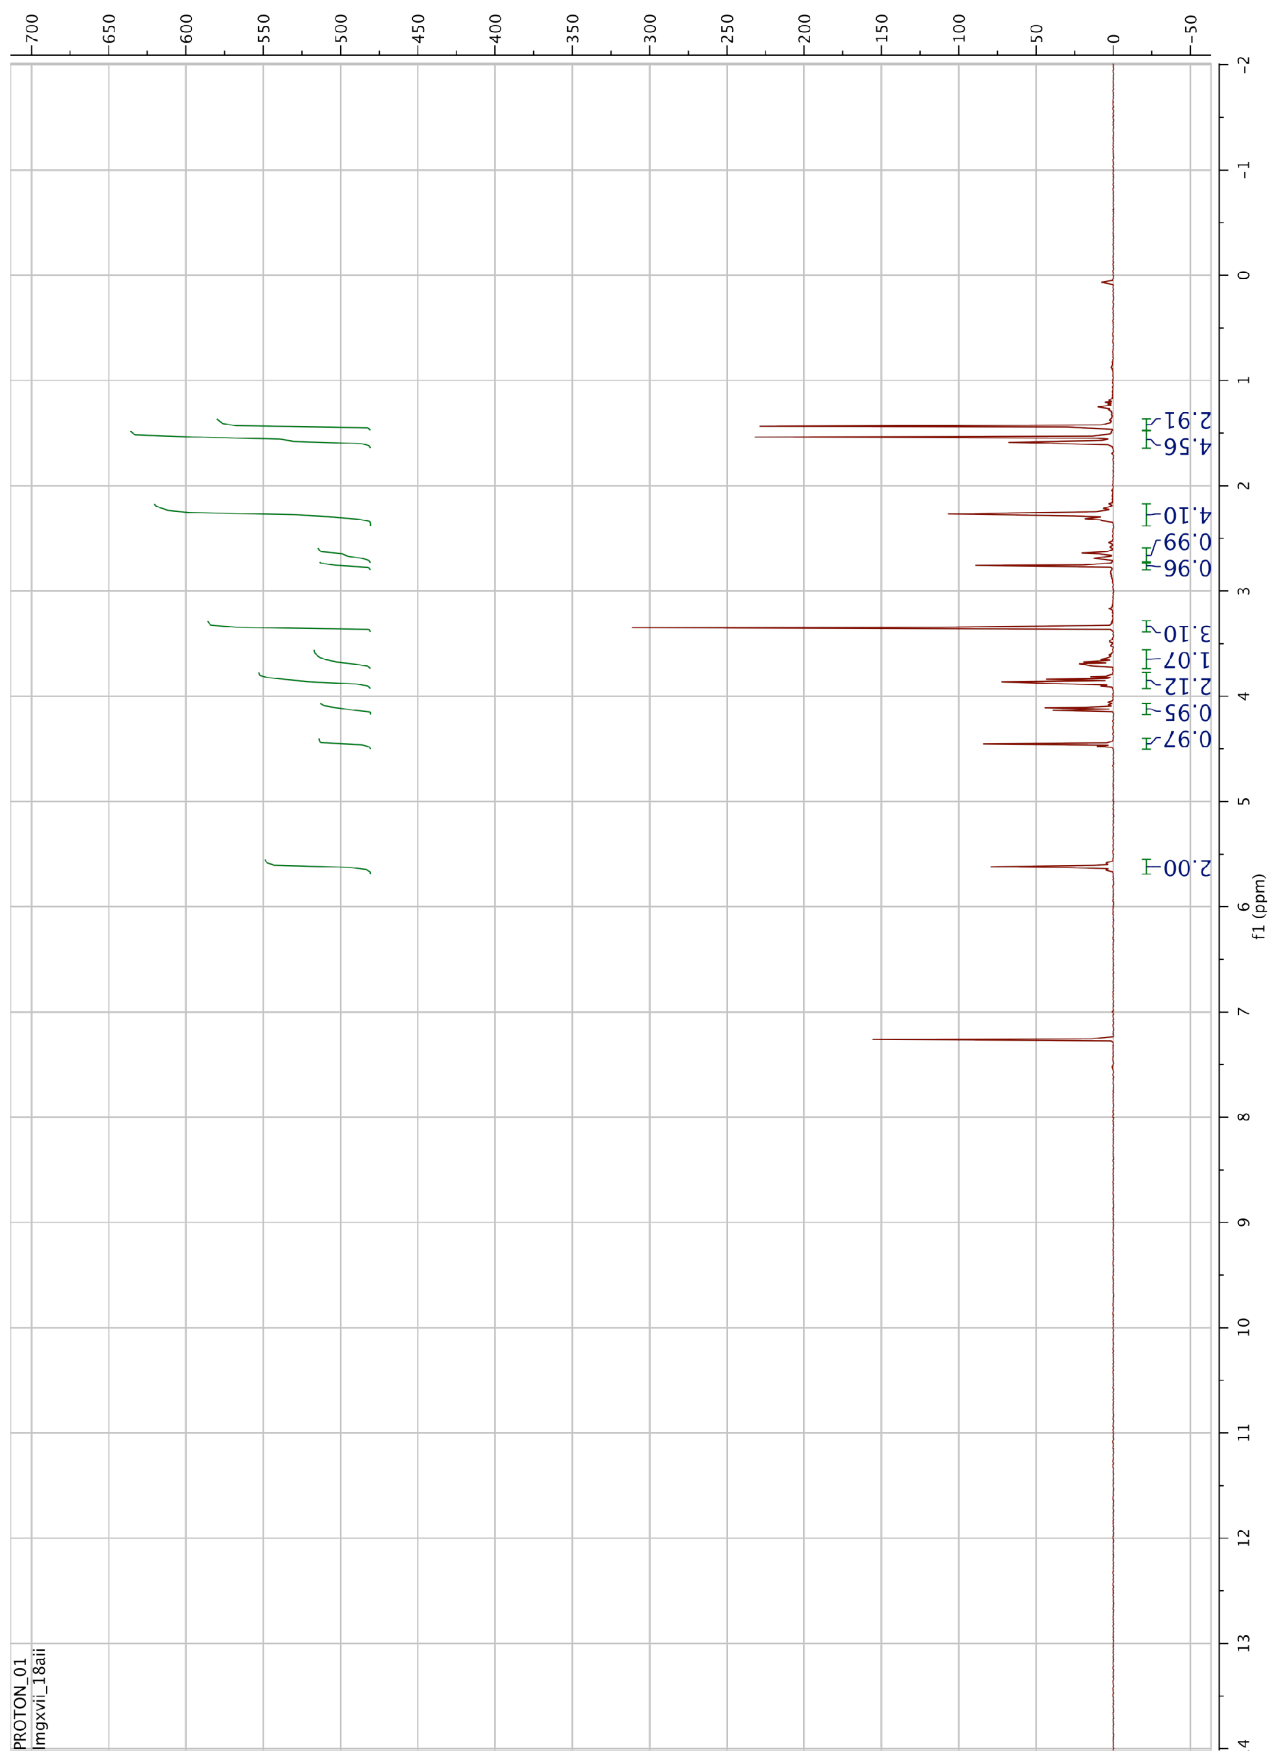

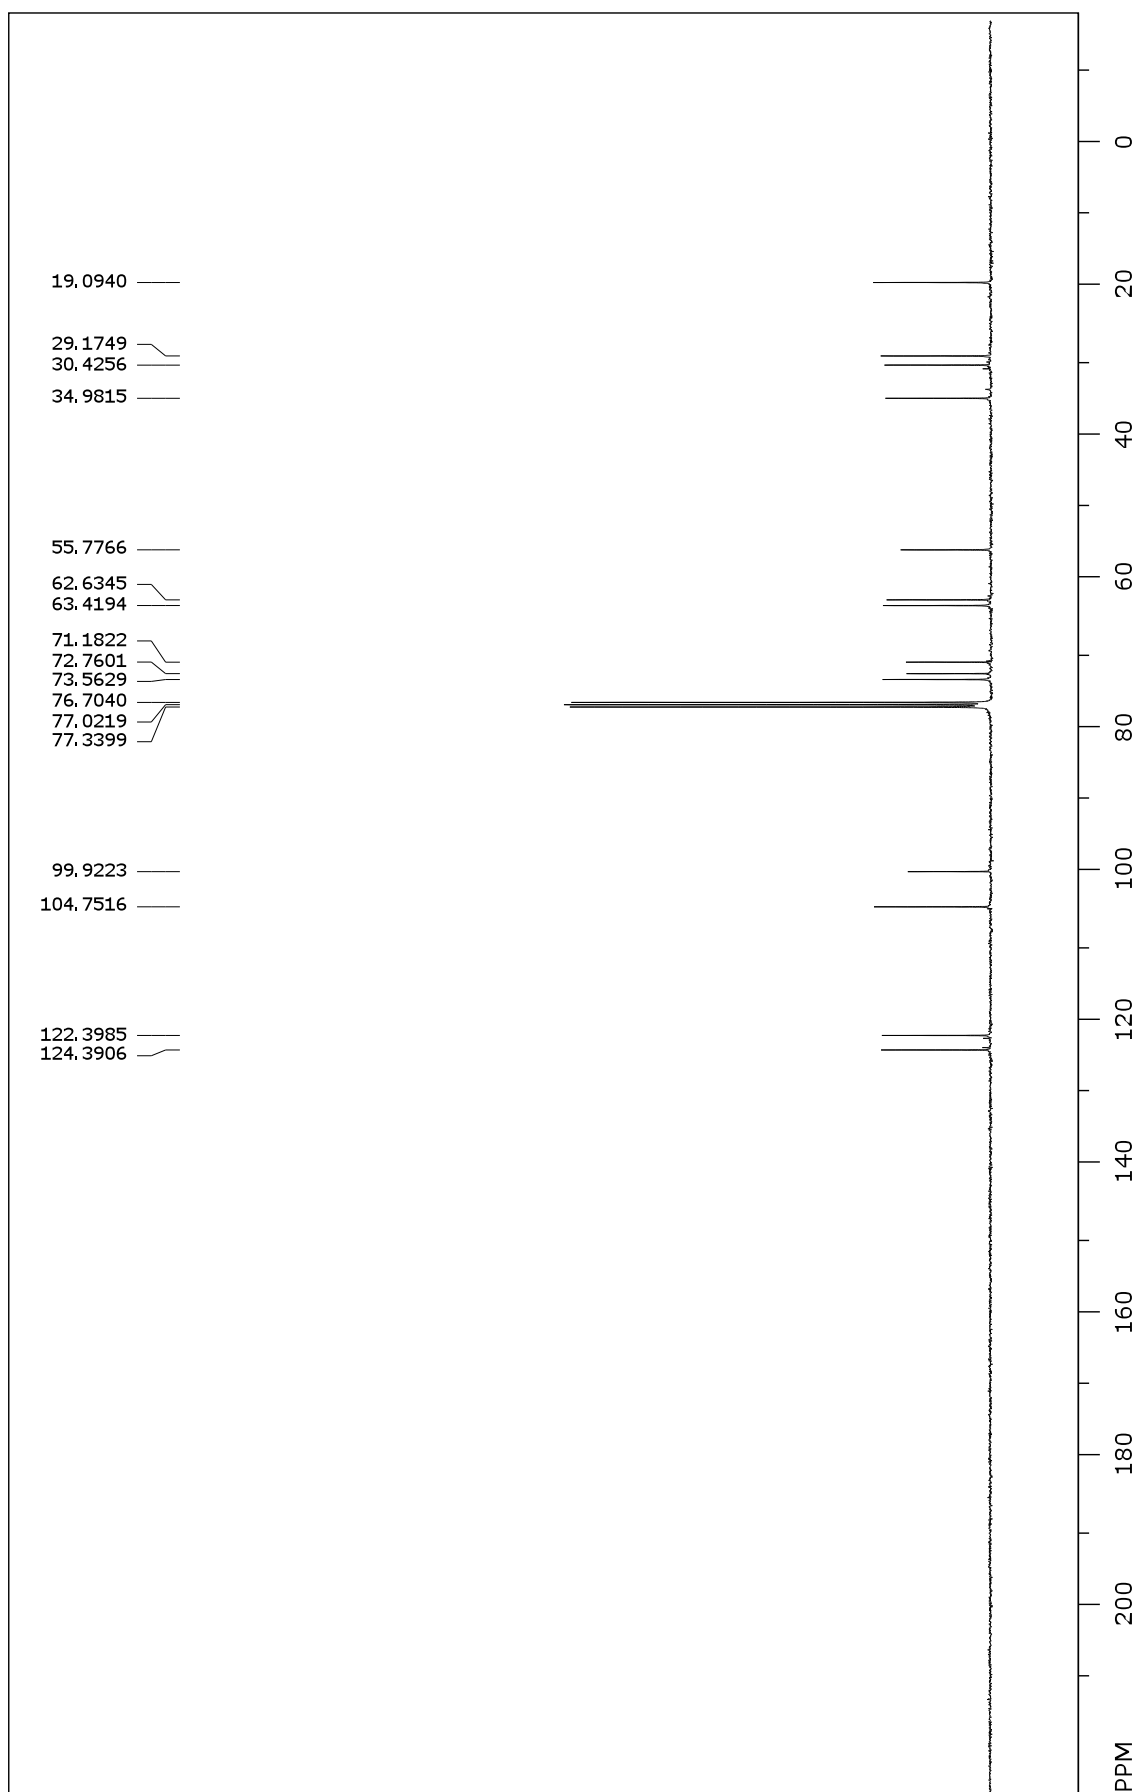

**(4aR\*,8aS\*,9aS\*,10aR\*)-1,4,5,8-tetrahydroanthracene-4a,8a,9a,10a(9H,10H)-tetraol**

**and (4aR\*,8aR\*,9aS\*,10aS\*)-1,4,5,8-tetrahydroanthracene-4a,8a,9a,10a(9H,10H)-tetraol (3r)**

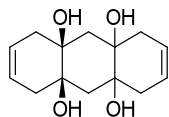

To an oven dried pressure tube sealed equipped with a stir bar with a septum under an argon atmosphere was added  $\text{Ru}_3(\text{CO})_{12}$  (7.6 mg, 0.012 mmol, 4 mol%), dppp (14.8 mg, 0.036 mmol, 12 mol%) and tetraol **1d** (44.5 mg, 0.3 mmol, 100 mol%). The pressure tube was purged with argon, and toluene (0.30 mL, 1.0 M) and *N,N*-dimethylacetamide (0.30 mL, 1.0 M) was added via syringe, followed by freshly condensed butadiene **2a** (0.26 mL, 3.0 mmol, 1000 mol%). The septum was replaced with a screw cap, and the reaction was heated to 130 °C. The reaction was allowed to stir for 48 hours. The volatiles were removed *in vacuo*, and the residue was subjected to flash column chromatography ( $\text{SiO}_2$ : 3:47, methanol: dichloromethane) to provide the cycloadduct **3r** (71.4 mg, 0.283 mmol, 92% yield, 1.4:1 dr) as a colorless solid. The  $^1\text{H}$  NMR spectrum of **3r** was identical in all respects to literature material.<sup>9</sup>

**$^1\text{H}$  NMR (400 MHz, acetone- $\text{d}_6$ ):**  $\delta$  5.49 (m, 1.75 H), 5.45 (m, 1.30 H), 2.85-2.78 (m, 8H), 2.32-2.62 (m, 4H) ppm.

<sup>9</sup> Geary, L. M.; Chen, T. Y.; Montgomery, P.; Krische, M. J., *J. Am. Chem. Soc.* **2014**, In Press. DOI: 10.1021/ja502659t

### Preparation and Spectroscopic Data for 1,6 -Diones **4a-4r**

Yields in Table 2 are reported as an average of two yields. The higher of the two yields is reported herein for compounds **4a-4o**.

**(Z)-cyclonon-7-ene-1,5-dione (4a)**

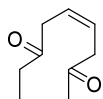

To an oven dried 2-dram vial equipped with a stir bar was added diacetoxyiodobenzene (38.7mg, 0.12 mmol, 120 mol%) and diol **3a** (15.4 mg, 0.10 mmol, 100 mol%). The vial was purged with argon, and dichloromethane was added (1.0 mL, 0.1M). The reaction was allowed to stir at ambient temperature for 2 hours. The volatiles were removed via rotary evaporation under reduced pressure. The crude products were subjected to flash column chromatography (SiO<sub>2</sub>: 2:3, ethyl acetate: hexanes) to furnish cyclononene **4a** (15.2 mg, 0.10 mmol, 99% yield) as a colorless oil.

**TLC (SiO<sub>2</sub>):** R<sub>f</sub> = 0.33 (2:3, ethyl acetate: hexanes).

**<sup>1</sup>H NMR (400 MHz, CDCl<sub>3</sub>):** δ 5.93 (ddd, *J* = 6.8, 5.2, 1.6 Hz, 2H), 3.14 (dd, *J* = 5.2, 1.6 Hz, 4H), 2.53-2.51 (m, 4H), 2.04-1.98 (m, 2H) ppm.

**<sup>13</sup>C NMR (100 MHz, CDCl<sub>3</sub>):** δ 210.6, 126.8, 43.5, 40.7, 29.7, 22.4 ppm.

**LRMS (ESI<sup>+</sup>):** Calculated for C<sub>9</sub>H<sub>12</sub>NaO<sub>2</sub><sup>+</sup> (*M*+Na<sup>+</sup>) 175.1; Found 175.1.

**FTIR (neat):** ν 2957, 2921, 2853, 2361, 2343, 1463, 1377, 1260, 1017, 800, 720 cm<sup>-1</sup>.

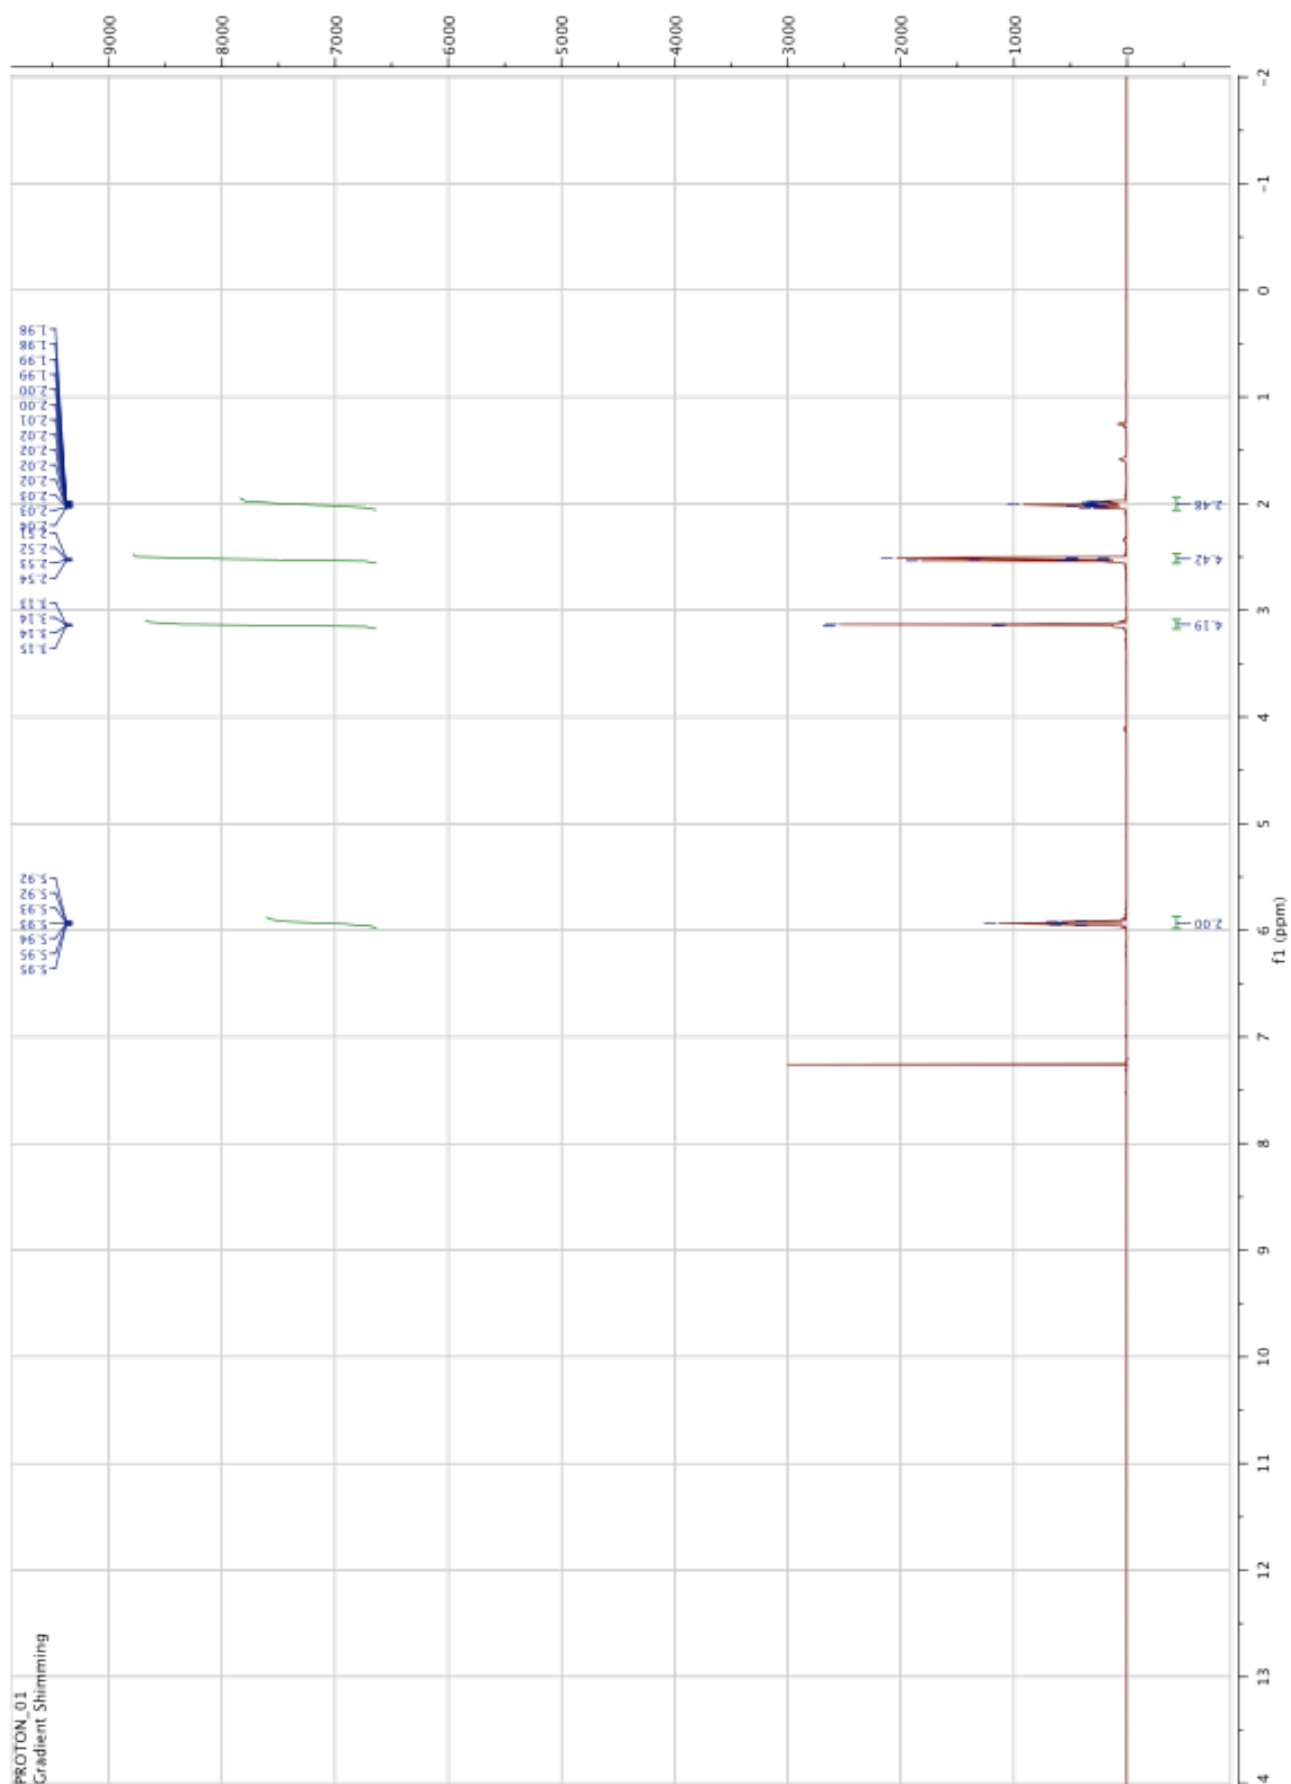



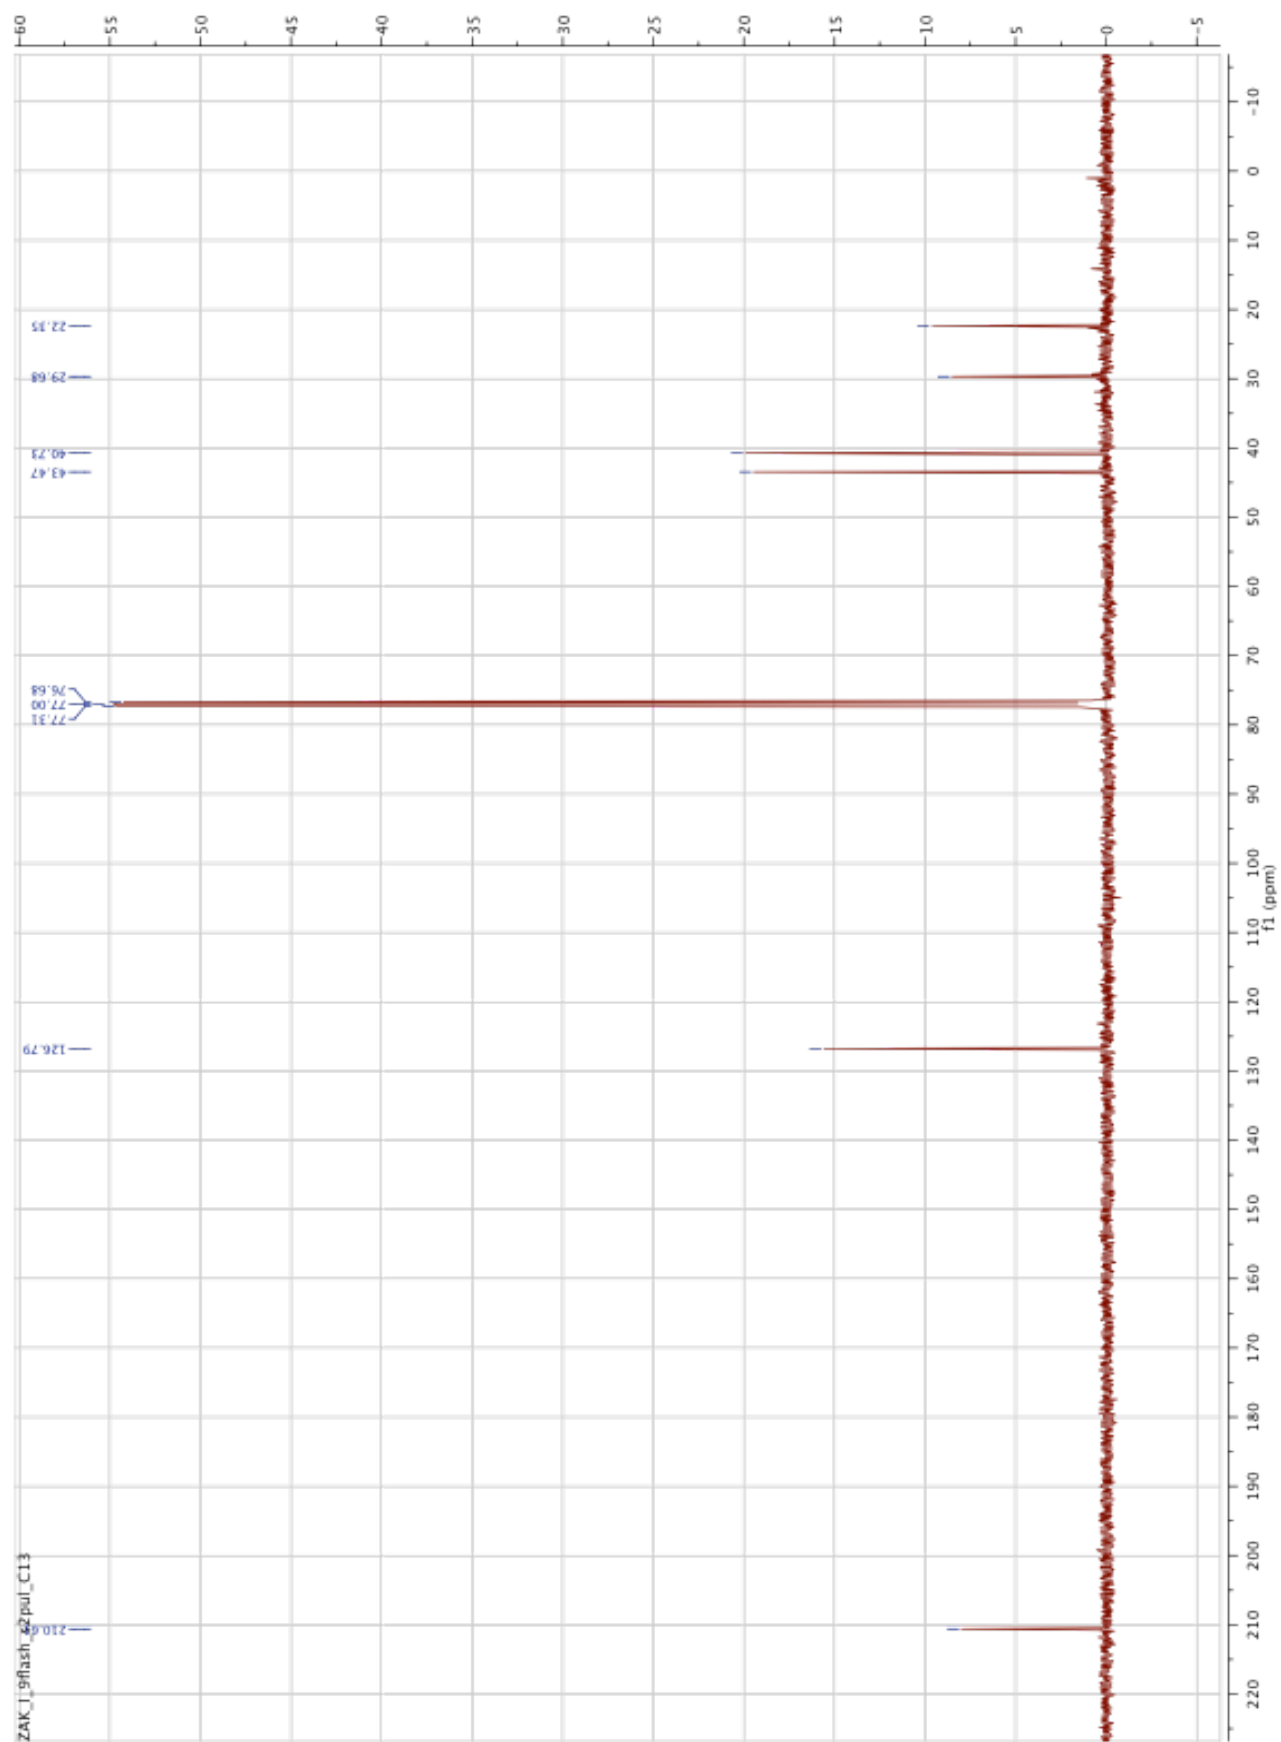

**(Z)-7-methylcyclonon-7-ene-1,5-dione (**4b**)**

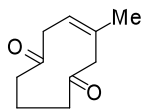

To an oven dried 2-dram vial equipped with a stir bar was added diacetoxyiodobenzene (38.7mg, 0.12 mmol, 120 mol%) and diol **3b** (16.9 mg, 0.1 mmol, 100 mol%). The vial was purged with argon, and dichloromethane was added (1.0 mL, 0.1M). The reaction was allowed to stir at ambient temperature for 2.5 hours. The volatiles were removed via rotary evaporation under reduced pressure. The residue was subjected to flash column chromatography (SiO<sub>2</sub>: 2:3, ethyl acetate: hexanes) to furnish cyclononene **4b** (14.5 mg, 0.087 mmol, 87% yield) as a colorless oil.

**TLC (SiO<sub>2</sub>):** R<sub>f</sub> = 0.21 (3:7, ethyl acetate: hexanes).

**<sup>1</sup>H NMR (400 MHz, CDCl<sub>3</sub>):** δ 5.67 (t, *J* = 8.0 Hz, 1H), 3.08 (s, 2H), 3.07 (d, *J* = 7.2 Hz, 2H), 2.51 (t, *J* = 6.4 Hz, 2H), 2.45 (t, *J* = 6.4 Hz, 2H), 2.03-1.96 (m, 2H), 1.93-1.92 (m, 3H) ppm.

**<sup>13</sup>C NMR (100 MHz, CDCl<sub>3</sub>):** δ 211.7, 210.5, 135.5, 120.7, 48.4, 44.2, 40.8, 40.5, 25.9, 23.1 ppm.

**LRMS (CI<sup>+</sup>):** Calculated for C<sub>10</sub>H<sub>15</sub>O<sub>2</sub><sup>+</sup> (M+H<sup>+</sup>) 167; Found 167.

**FTIR (neat):** ν 2929, 1698, 1437, 1320, 1204, 1150, 833 cm<sup>-1</sup>.

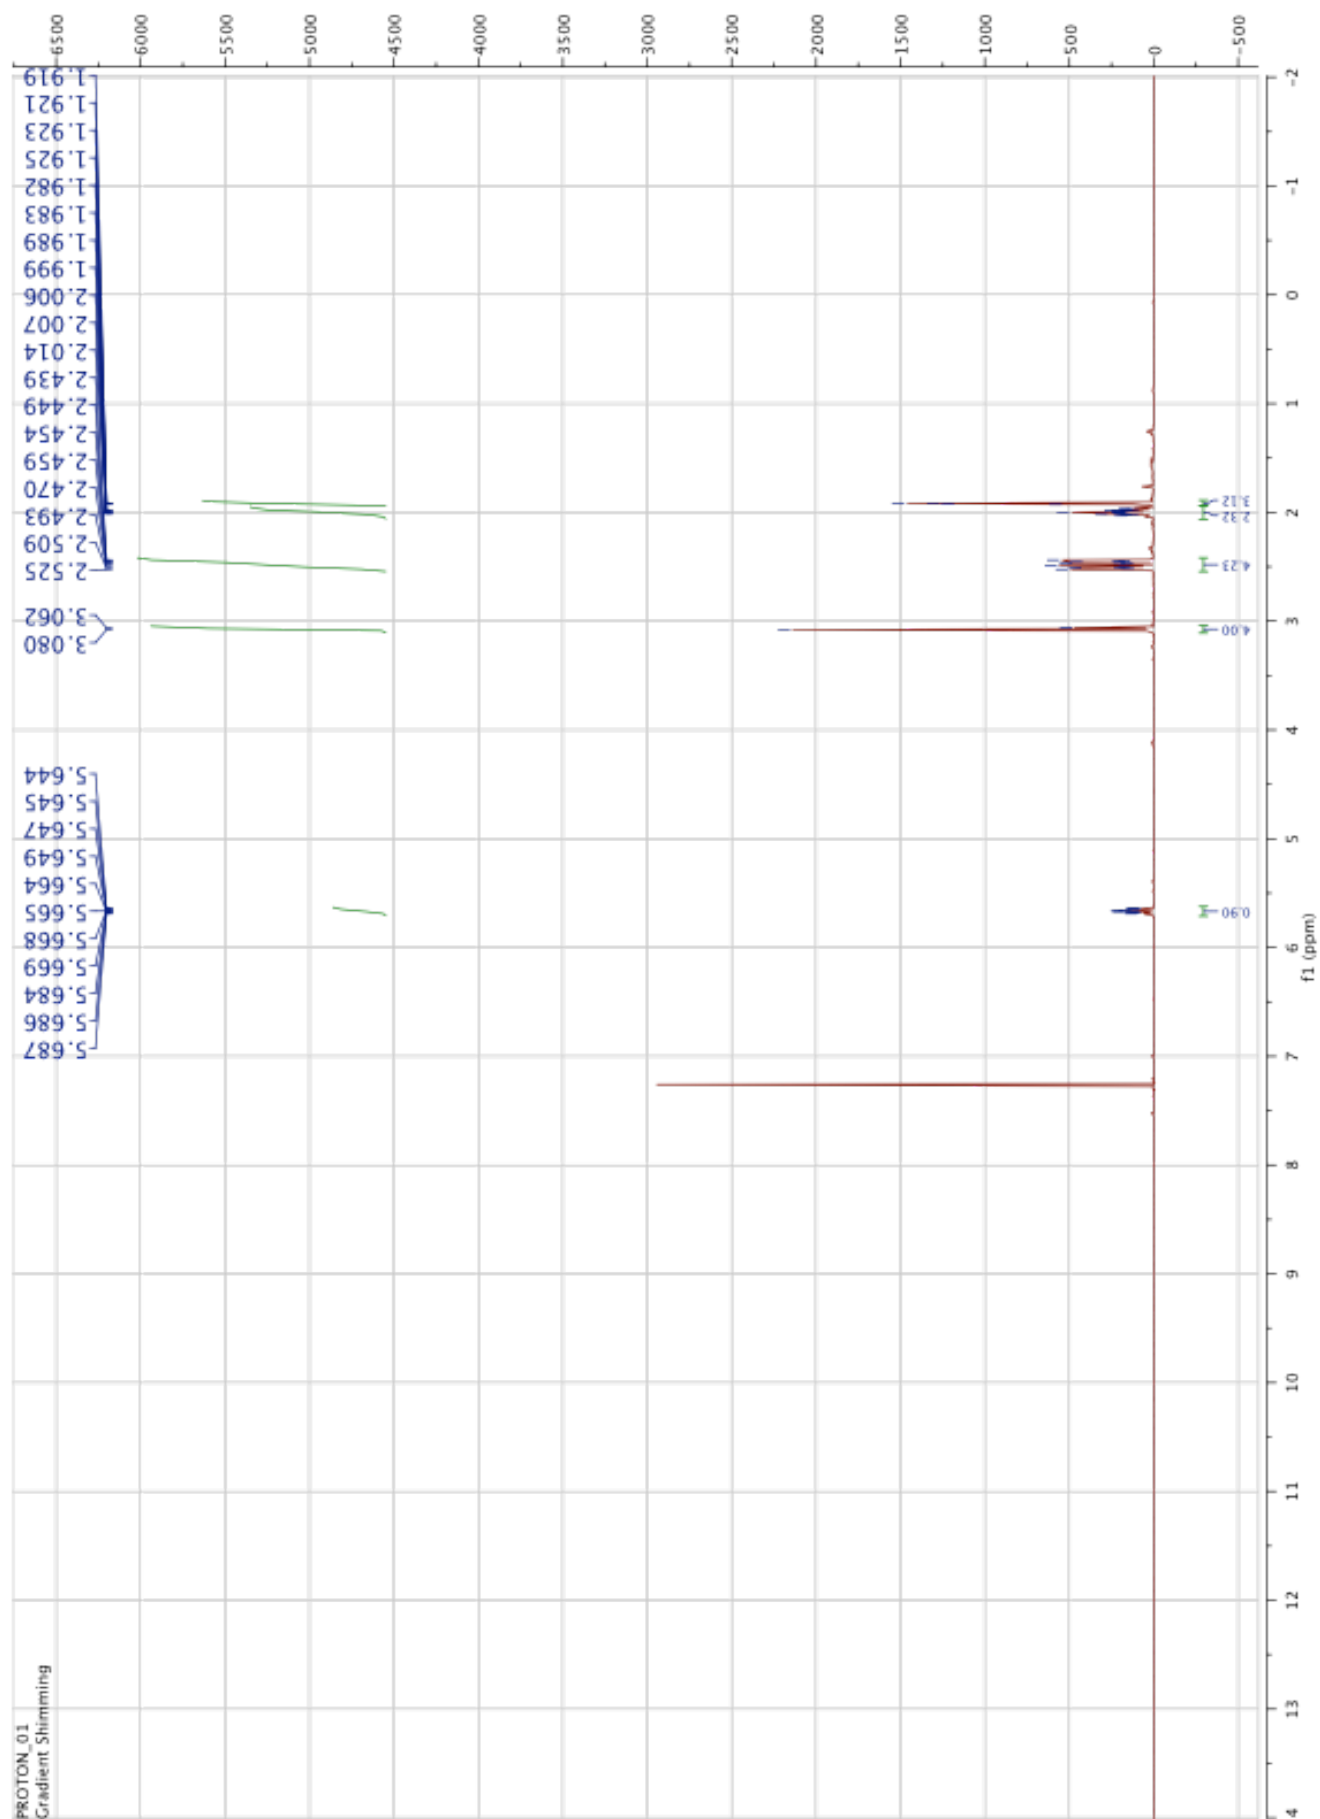

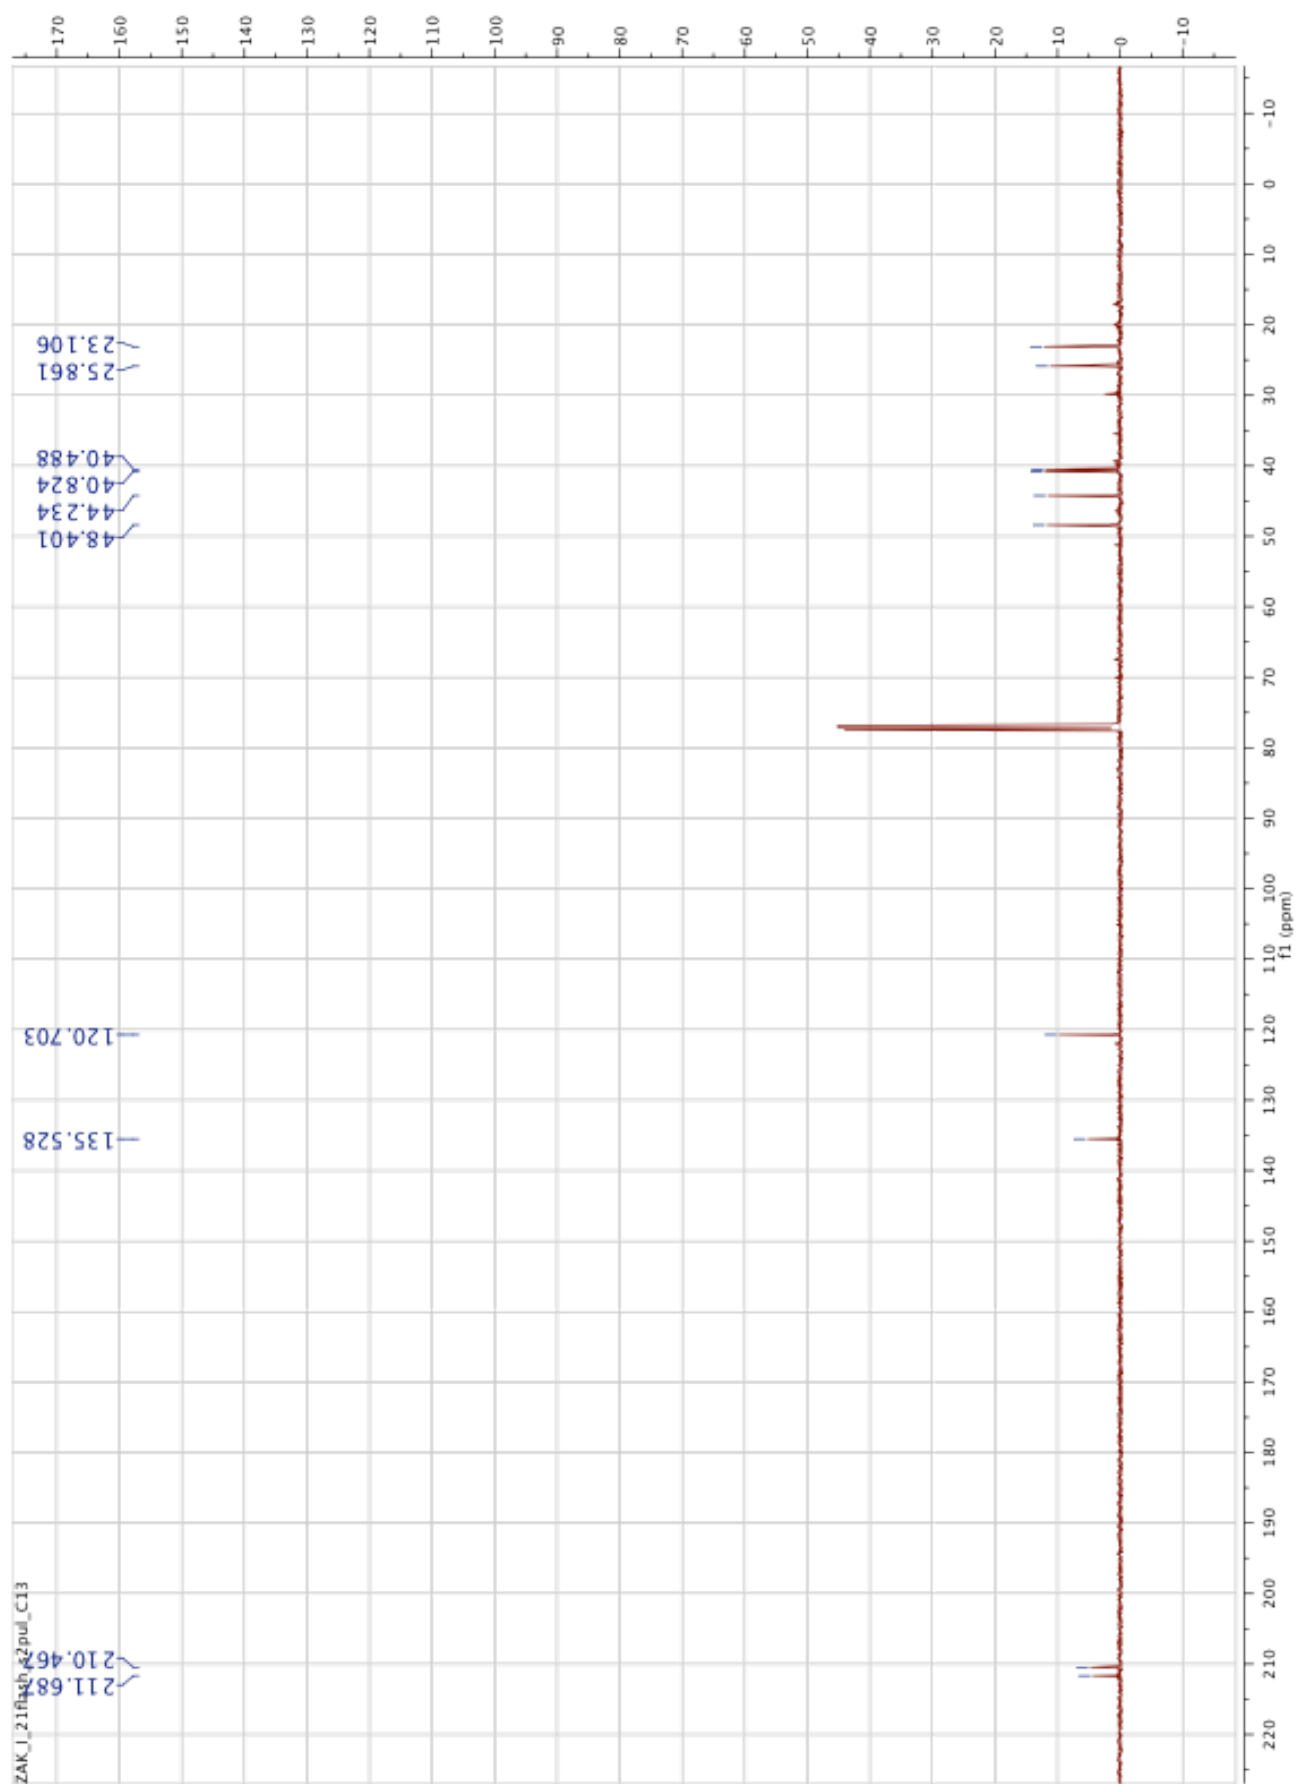

**(Z)-7-(4-Methylpent-3-en-1-yl)cyclonon-7-ene-1,5-dione (4c)**

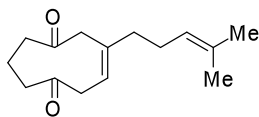

To an oven dried 2-dram vial equipped with a stir bar was added diacetoxyiodobenzene (85.8mg, 0.26 mmol, 120 mol%) and diol **3c** (52.5 mg, 0.22 mmol, 100 mol%). The vial was purged with argon, and dichloromethane was added (1.0 mL, 0.1M). The reaction was allowed to stir at ambient temperature for 2.5 hours. The volatiles were removed via rotary evaporation under reduced pressure. The residue was subjected to flash column chromatography (SiO<sub>2</sub>: 1:9, ethyl acetate: hexanes) to furnish cyclononene **4c** (48.5 mg, 0.205 mmol, 93% yield) as a colorless oil.

**TLC (SiO<sub>2</sub>):** R<sub>f</sub> = 0.40 (2:3, ethyl acetate: hexanes).

**<sup>1</sup>H NMR (400 MHz, CDCl<sub>3</sub>):** δ 5.64 (t, 1H, *J* = 7 Hz), 5.07 (m, 1H), 3.07 (m, 4H), 2.51-2.41 (m, 4H), 2.24-2.10 (m, 4H), 2.01-1.93 (m, 2H), 1.68 (s, 3H), 1.60 (s, 3H) ppm.

**<sup>13</sup>C NMR (100 MHz, CDCl<sub>3</sub>):** δ 211.5, 210.7, 138.8, 132.5, 123.2, 120.3, 47.3, 43.9, 40.9, 40.1, 39.2, 25.9, 25.7, 22.9, 17.8 ppm.

**LRMS (CI<sup>+</sup>):** Calculated for C<sub>15</sub>H<sub>23</sub>O<sub>2</sub> (M+H) 235; Found 235.

**FTIR (neat):** ν 2930, 1699, 1437, 1145, 1070 cm<sup>-1</sup>.

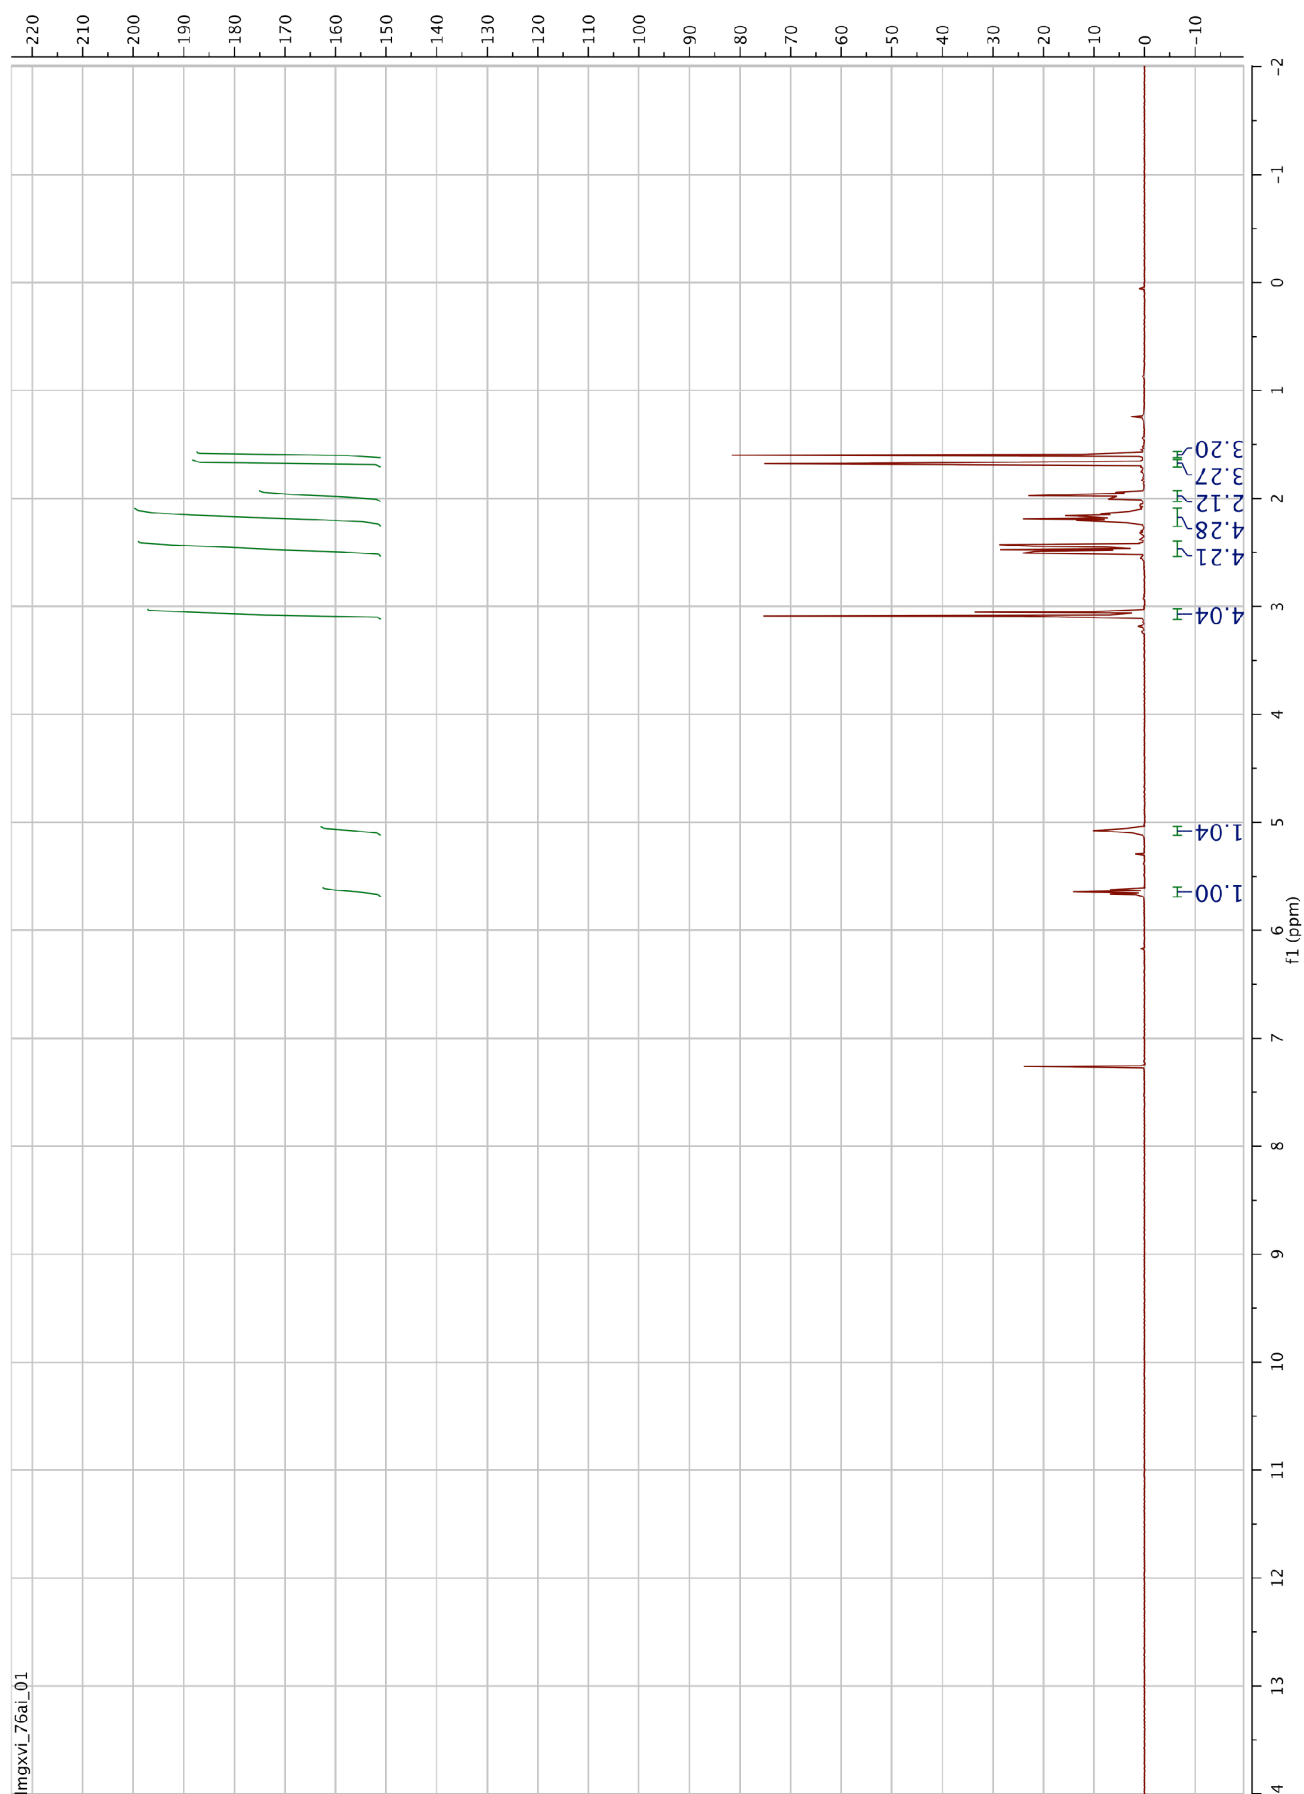

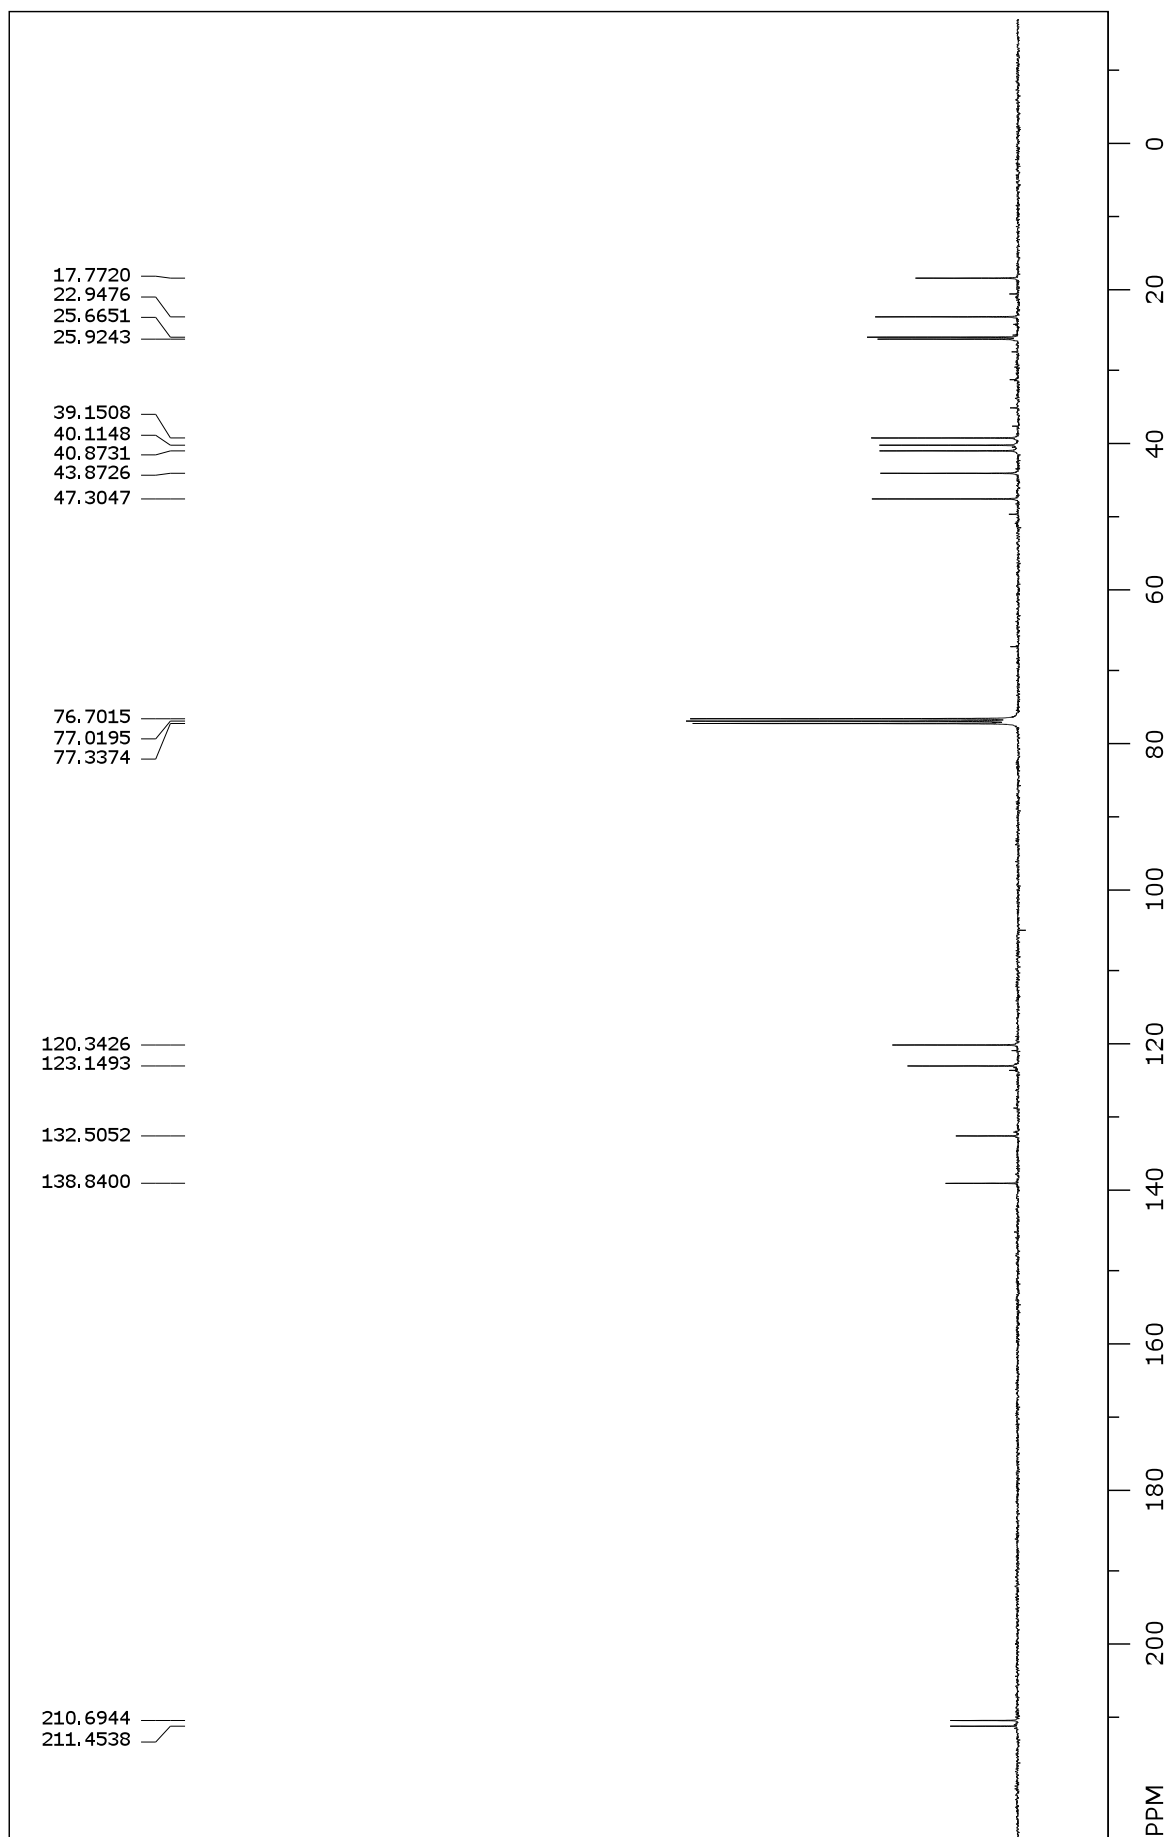

**(Z)-cyclodec-3-ene-1,6-dione (4d)**

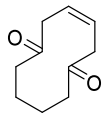

To an oven dried 2-dram vial equipped with a stir bar was added diacetoxyiodobenzene (38.7mg, 0.12 mmol, 120 mol%) and diol **3d** (16.8 mg, 0.1000 mmol, 100 mol%). The vial was purged with argon, and dichloromethane was added (1.0 mL, 0.1M). The reaction was allowed to stir at ambient temperature for 3 hours. The volatiles were removed via rotary evaporation under reduced pressure. The residue was subjected to flash column chromatography (SiO<sub>2</sub>: 3:7, ethyl acetate: hexanes) to furnish cyclodecene **4d** (15.0 mg, 0.902 mmol, 90% yield) as a colorless solid.

**TLC (SiO<sub>2</sub>):** R<sub>f</sub> = 0.31 (hexanes:ethyl acetate = 7:3).

**<sup>1</sup>H NMR (400 MHz, CDCl<sub>3</sub>):** δ 5.83 (ddd, *J* = 6.2, 4.8, 1.2 Hz, 4H), 3.14 (dd, *J* = 5.0, 1.2 Hz, 4H), 2.47-2.44 (m, 4H), 1.86-1.83 (m, 4H) ppm.

**<sup>13</sup>C NMR (100 MHz, CDCl<sub>3</sub>):** δ 211.6, 126.3, 41.9, 40.6, 23.5 ppm.

**MP:** 83-85 °C.

**LRMS (ESI+):** Calculated for C<sub>10</sub>H<sub>14</sub>NaO<sub>2</sub><sup>+</sup> (*M*+Na<sup>+</sup>) 189.1; Found 189.1.

**FTIR (neat):** ν 2937, 2359, 1690, 1426, 1330, 1304, 1217, 1197, 1150, 988, 804, 699, 673 cm<sup>-1</sup>.



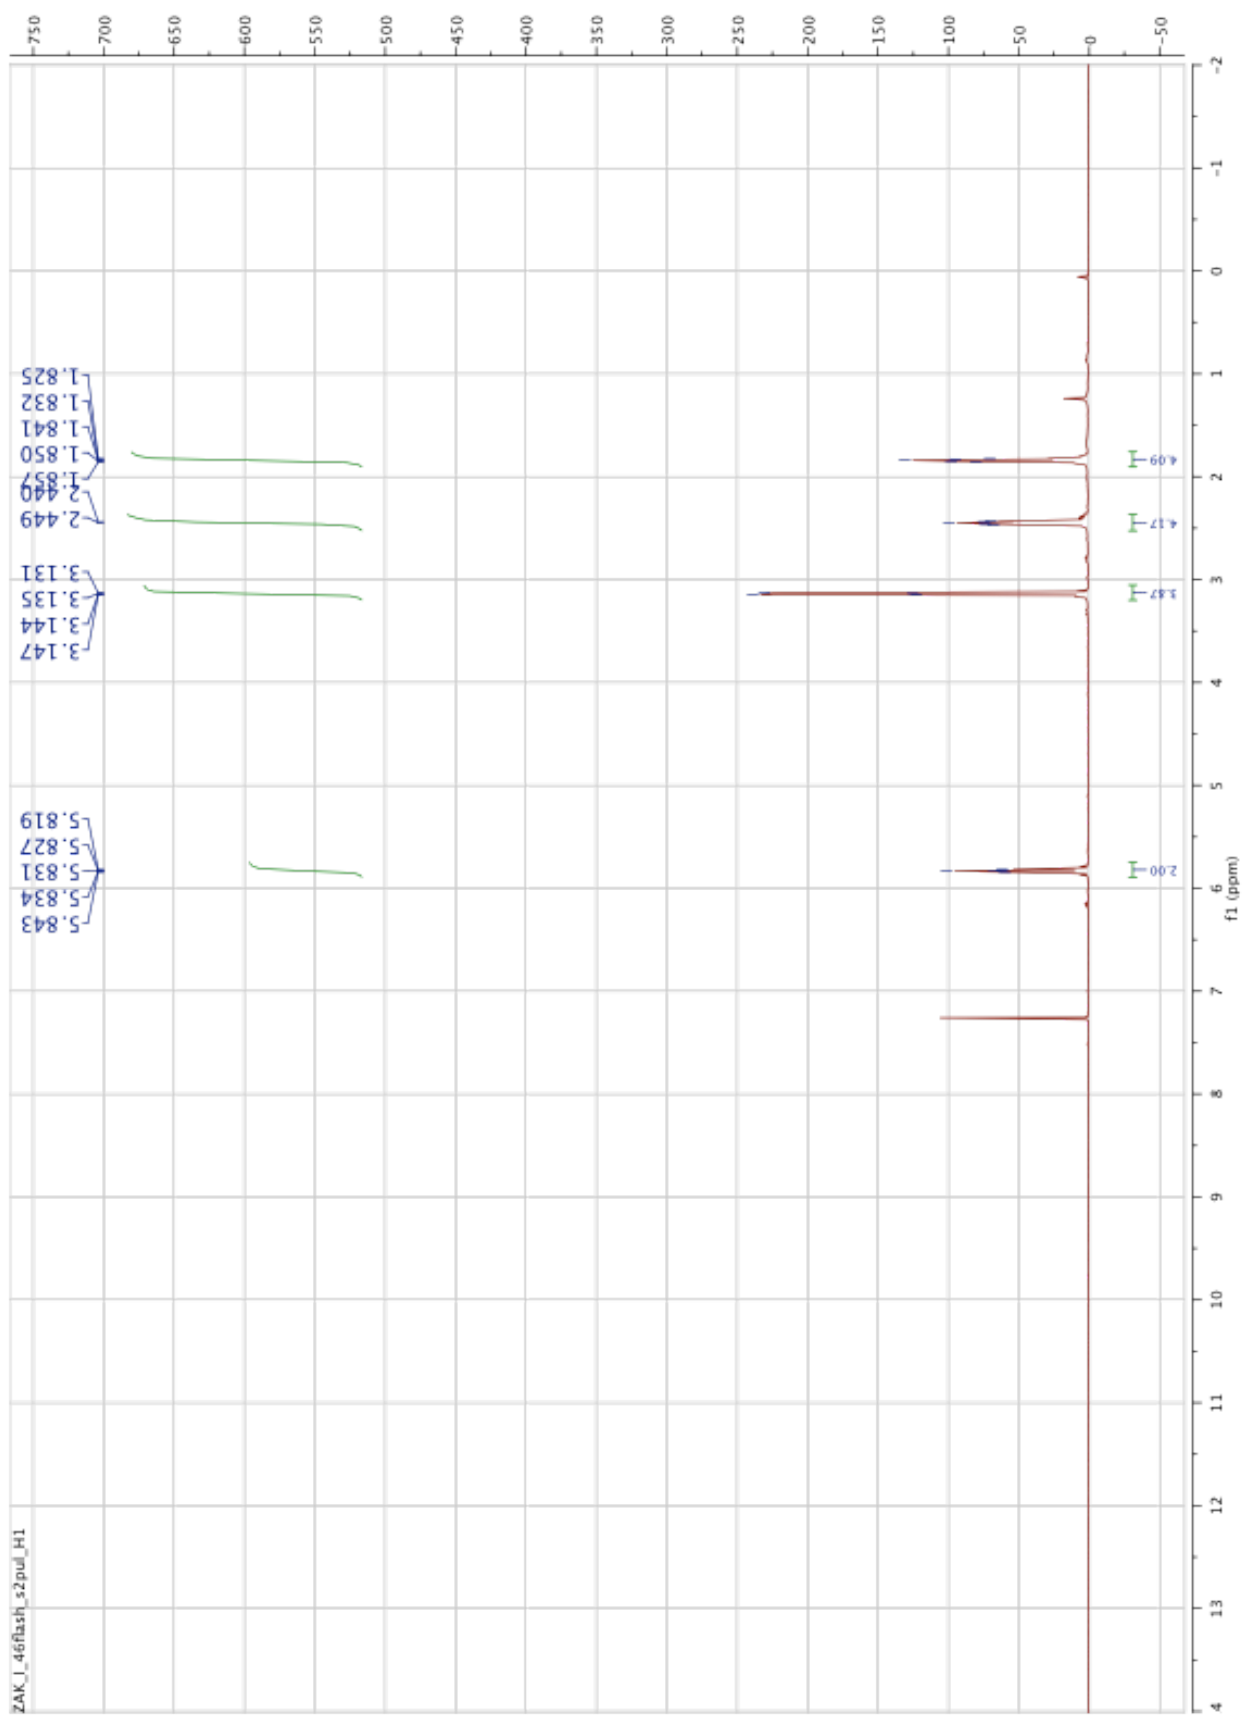

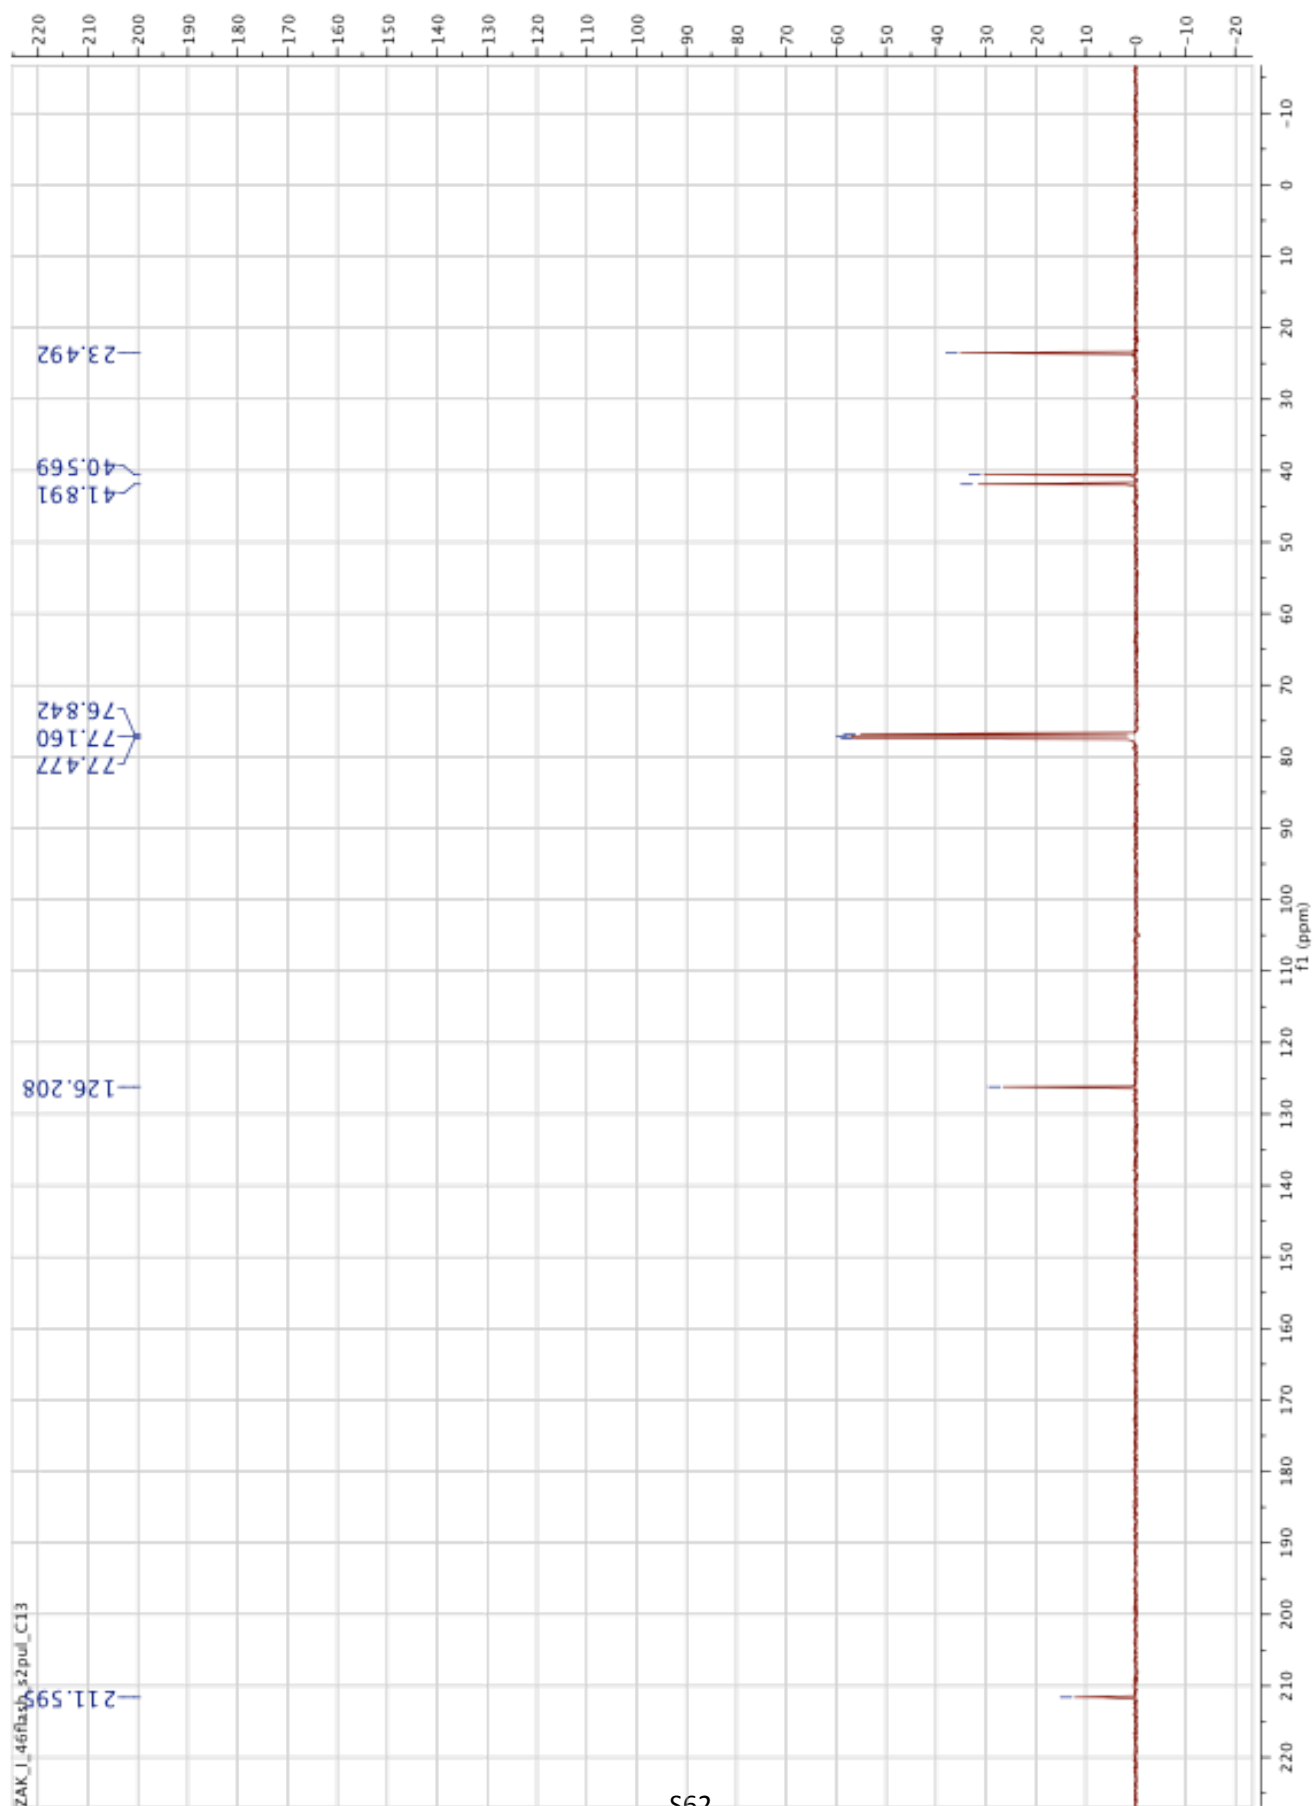

**(Z)-3-methylcyclodec-3-ene-1,6-dione (4e)**

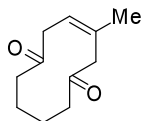

To an oven dried 2-dram vial equipped with a stir bar was added diacetoxyiodobenzene (38.7mg, 0.12 mmol, 120 mol%) and diol **3e** (18.2 mg, 0.10 mmol, 100 mol%). The vial was purged with argon, and dichloromethane was added (1.0 mL, 0.1M). The reaction was allowed to stir at ambient temperature for 2 hours. The volatiles were removed via rotary evaporation under reduced pressure. The residue was subjected to flash column chromatography (SiO<sub>2</sub>: 3:7, ethyl acetate: hexanes) to furnish cyclodecene **4e** (18.0 mg, 0.12 mmol, 99% yield) as a colorless oil.

**TLC (SiO<sub>2</sub>):** R<sub>f</sub> = 0.37 (3:7, ethyl acetate: hexanes).

**<sup>1</sup>H NMR (400 MHz, CDCl<sub>3</sub>):** δ 5.61 (t, *J* = 7.8 Hz, 1H), 3.12(s, 2H), 3.11 (d, 8.8 Hz, 2H), 2.47-2.41 (m, 4H), 1.87 (s, 3H), 1.77-1.87 (m, 4H) ppm.

**<sup>13</sup>C NMR (100 MHz, CDCl<sub>3</sub>):** δ 212.5, 211.0, 134.2, 120.8, 47.2, 42.4, 40.9, 39.4, 25.8, 23.9, 23.8 ppm.

**LRMS (CI<sup>+</sup>):** Calculated for C<sub>11</sub>H<sub>17</sub>O<sub>2</sub><sup>+</sup> (M+H<sup>+</sup>) 181; Found 181.

**FTIR (neat):** ν 2930, 1698, 1434, 1329, 1112, 849 cm<sup>-1</sup>.

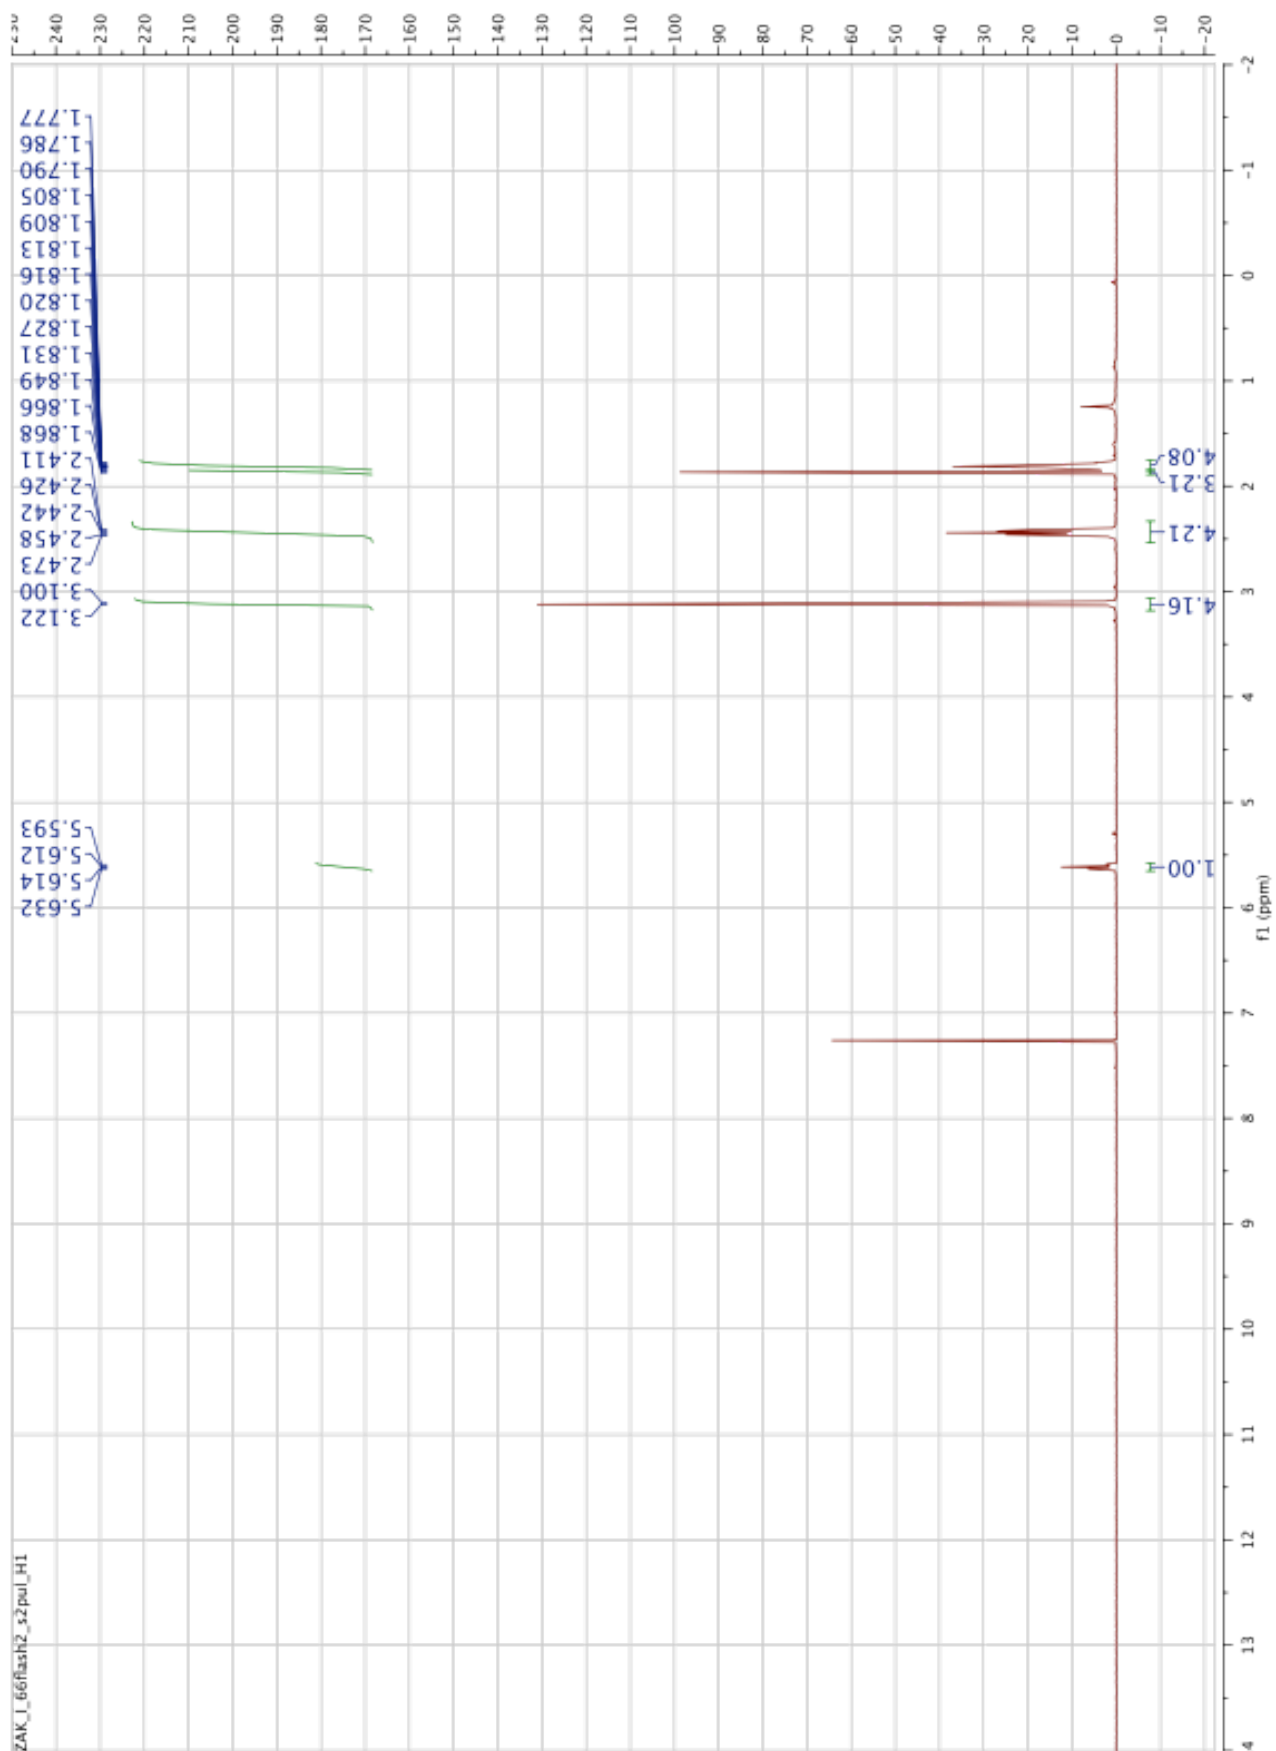

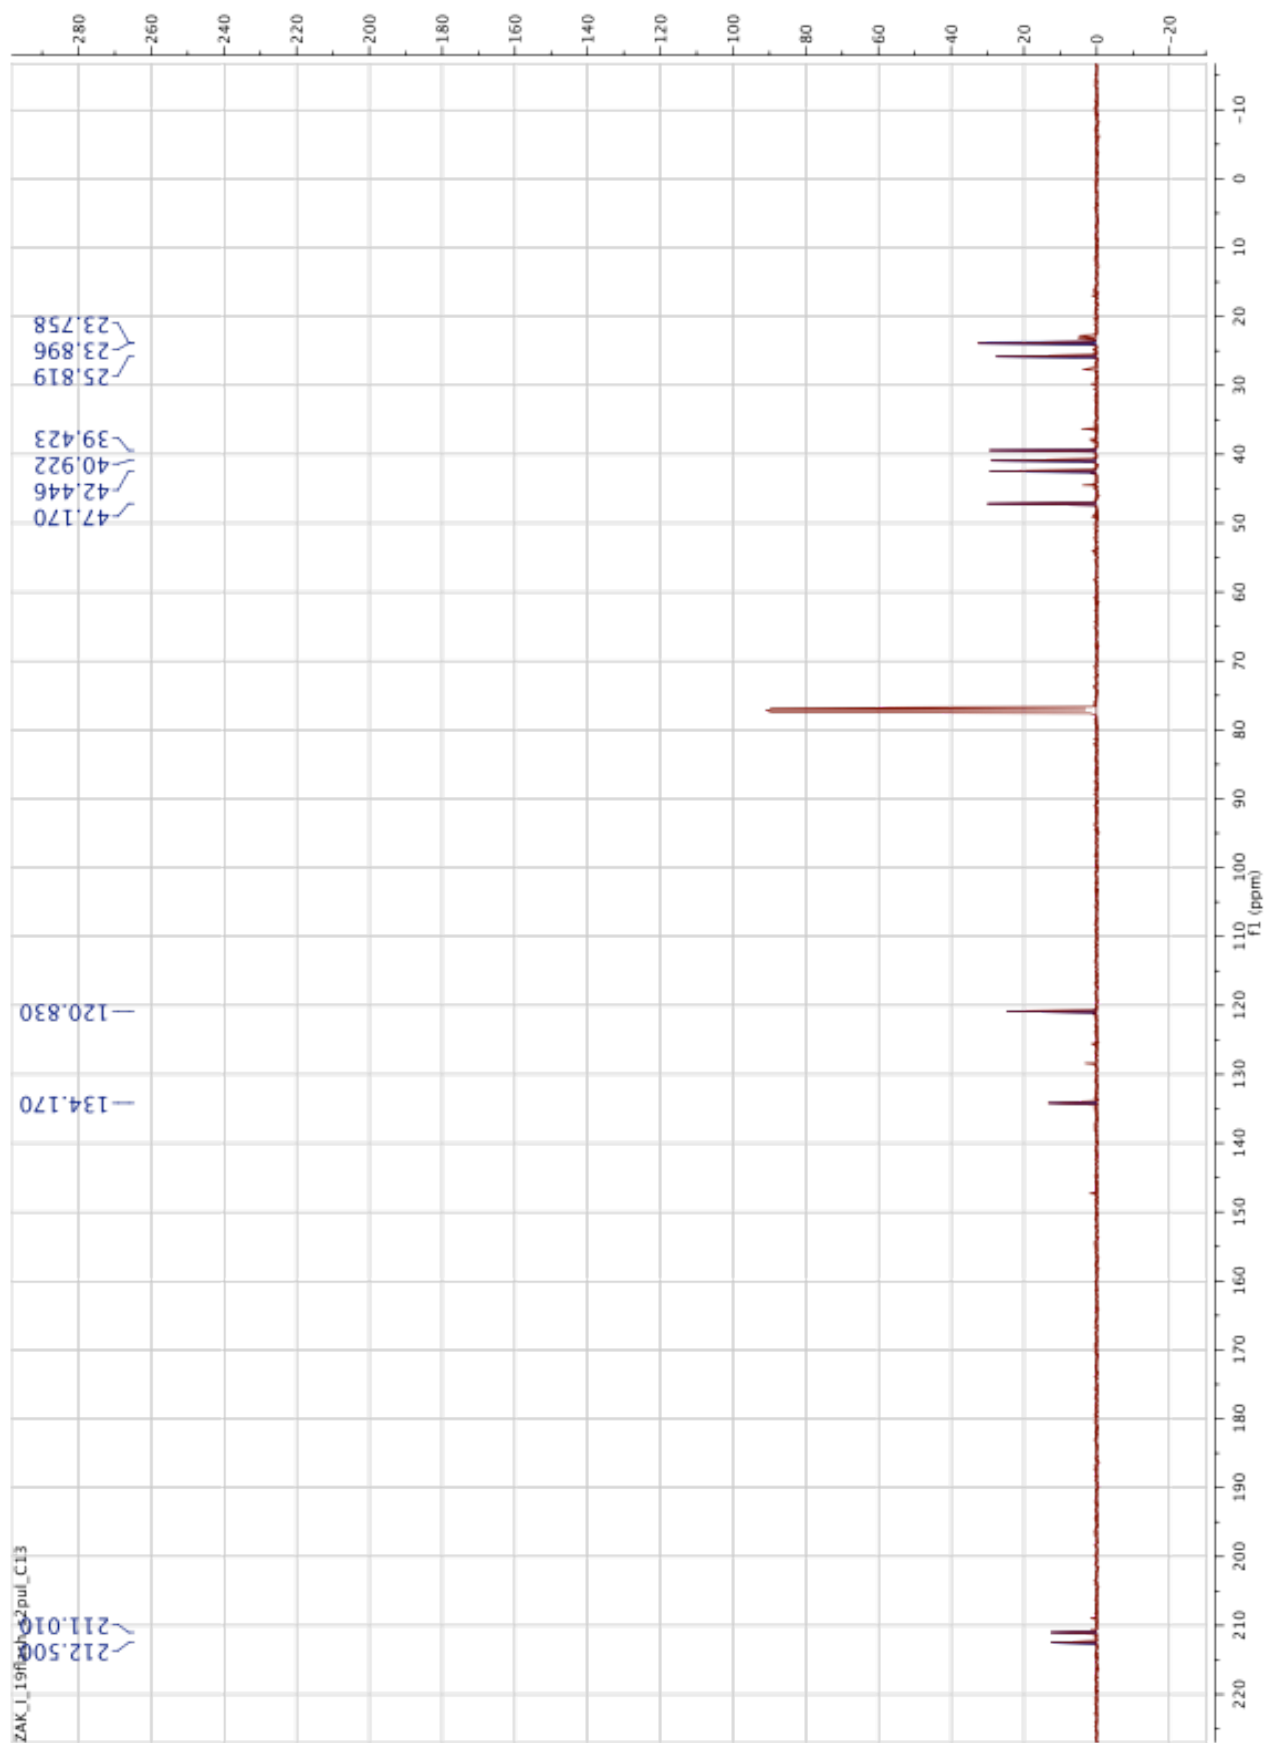

**(Z)-3-(4-methylpent-3-en-1-yl)cyclodec-3-ene-1,6-dione (4f)**

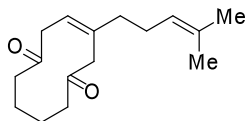

To an oven dried 2-dram vial equipped with a stir bar was added diacetoxyiodobenzene (38.7mg, 0.12 mmol, 120 mol%) and diol **3f** (25.0 mg, 0.10 mmol, 100 mol%). The vial was purged with argon, and dichloromethane was added (1.0 mL, 0.1M). The reaction was allowed to stir at ambient temperature for 4 hours. The volatiles were removed via rotary evaporation under reduced pressure. The residue was subjected to flash column chromatography (SiO<sub>2</sub>: 1:4-3:7, ethyl acetate: hexanes) to furnish cyclodecene **4f** (24.8 mg, 0.10 mmol, 99% yield) as a colorless oil.

**TLC (SiO<sub>2</sub>):** R<sub>f</sub> = 0.40 (3:7, ethyl acetate: hexanes).

**<sup>1</sup>H NMR (400 MHz, CDCl<sub>3</sub>):** δ 5.65 (t, *J* = 8.1 Hz, 1H), 5.08-5.05 (m, 1H), 3.13 (s, 2H), 3.11 (d, *J* = 8.3 Hz, 2H), 2.46-2.40 (m, 4H), 2.18-2.09 (m, 4H) 1.85-1.79 (m, 4H), 1.67 (s, 3H), 1.59 (s, 3H) ppm.

**<sup>13</sup>C NMR (100 MHz, CDCl<sub>3</sub>):** δ 212.6, 211.2, 137.6, 132.4, 123.4, 120.9, 46.2, 41.9, 41.6, 39.2, 38.7, 26.4, 25.8, 23.9, 23.7, 17.9 ppm.

**LRMS (CI<sup>+</sup>):** Calculated for C<sub>16</sub>H<sub>25</sub>O<sub>2</sub><sup>+</sup> (M+H<sup>+</sup>) 249; Found 249.

**FTIR (neat):** ν 2929, 2360, 1700, 1439, 1364, 1302, 1218, 1105, 668 cm<sup>-1</sup>.

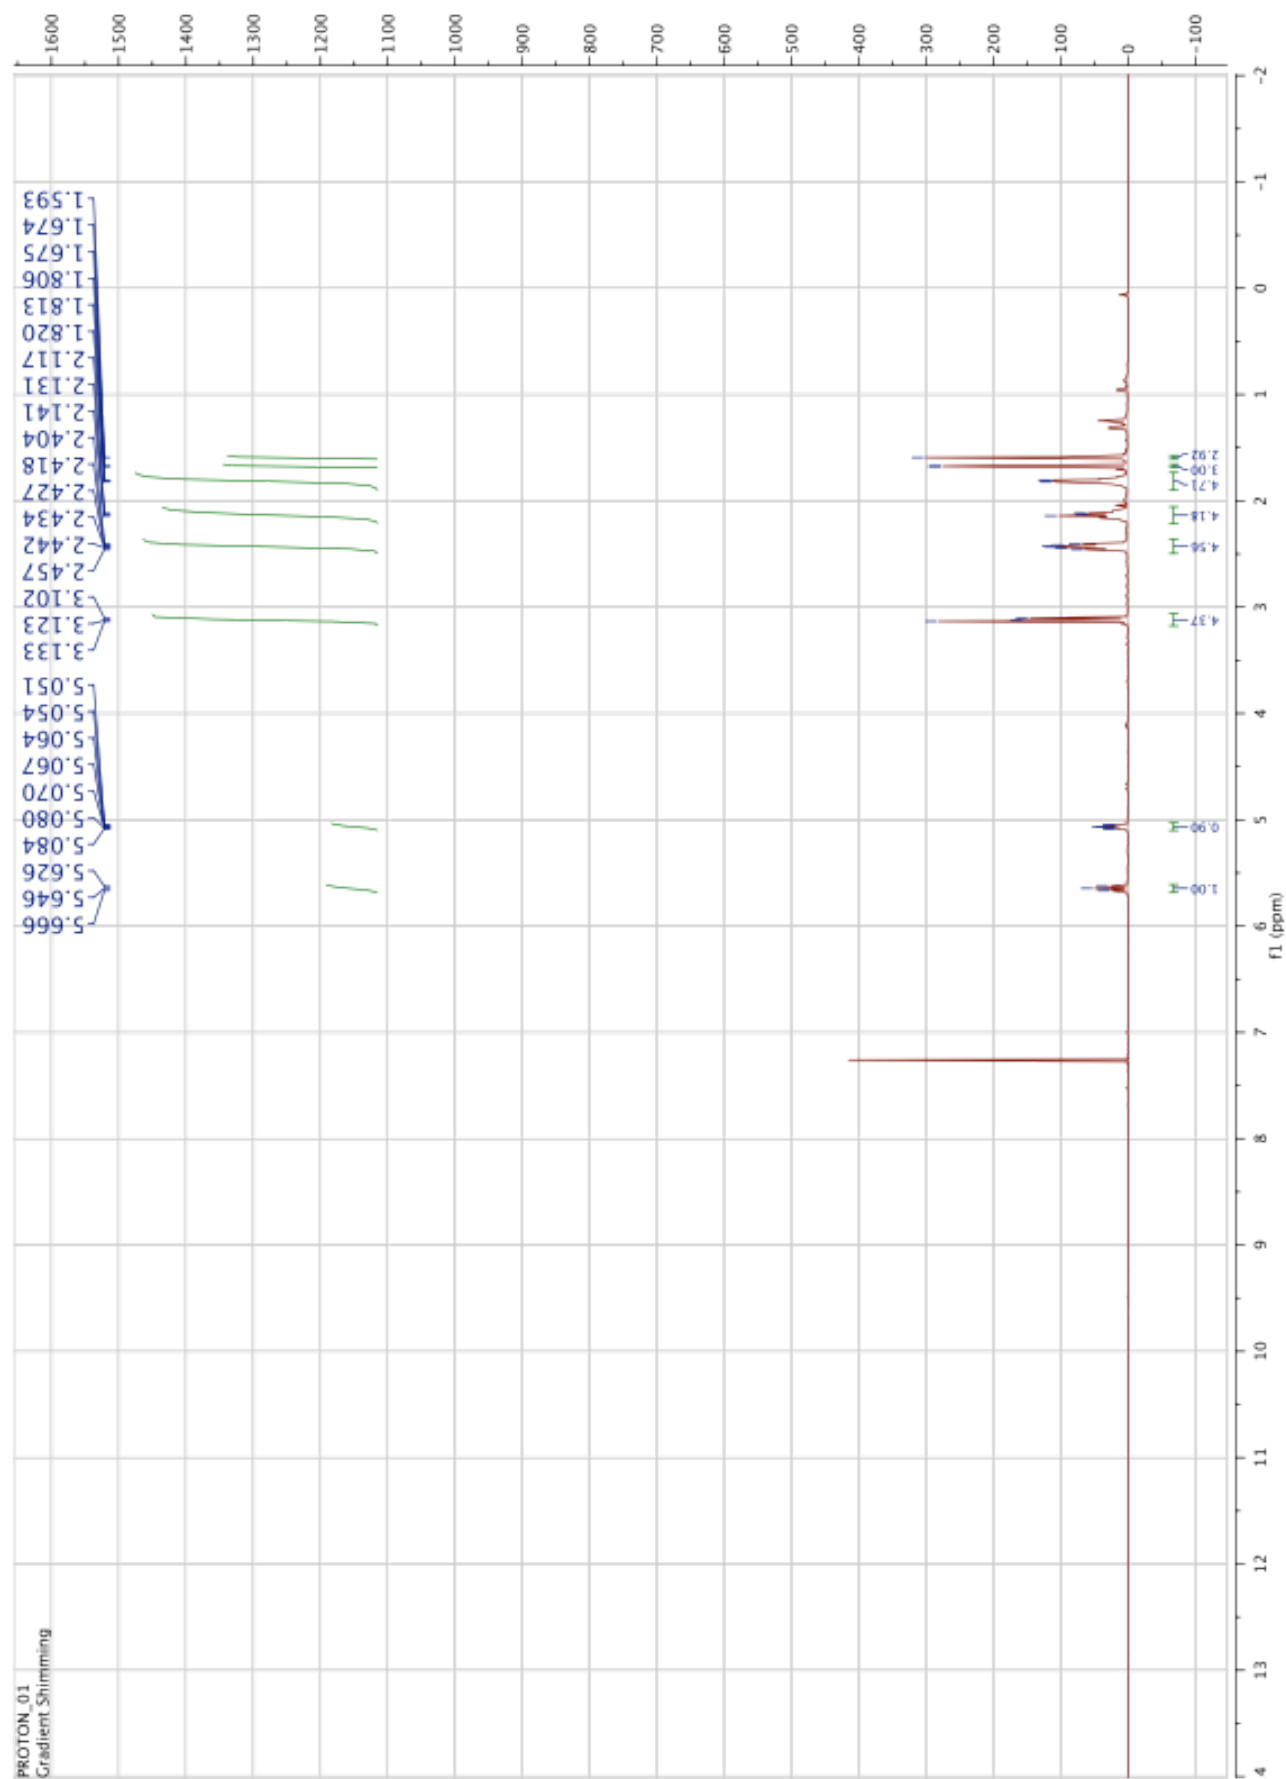

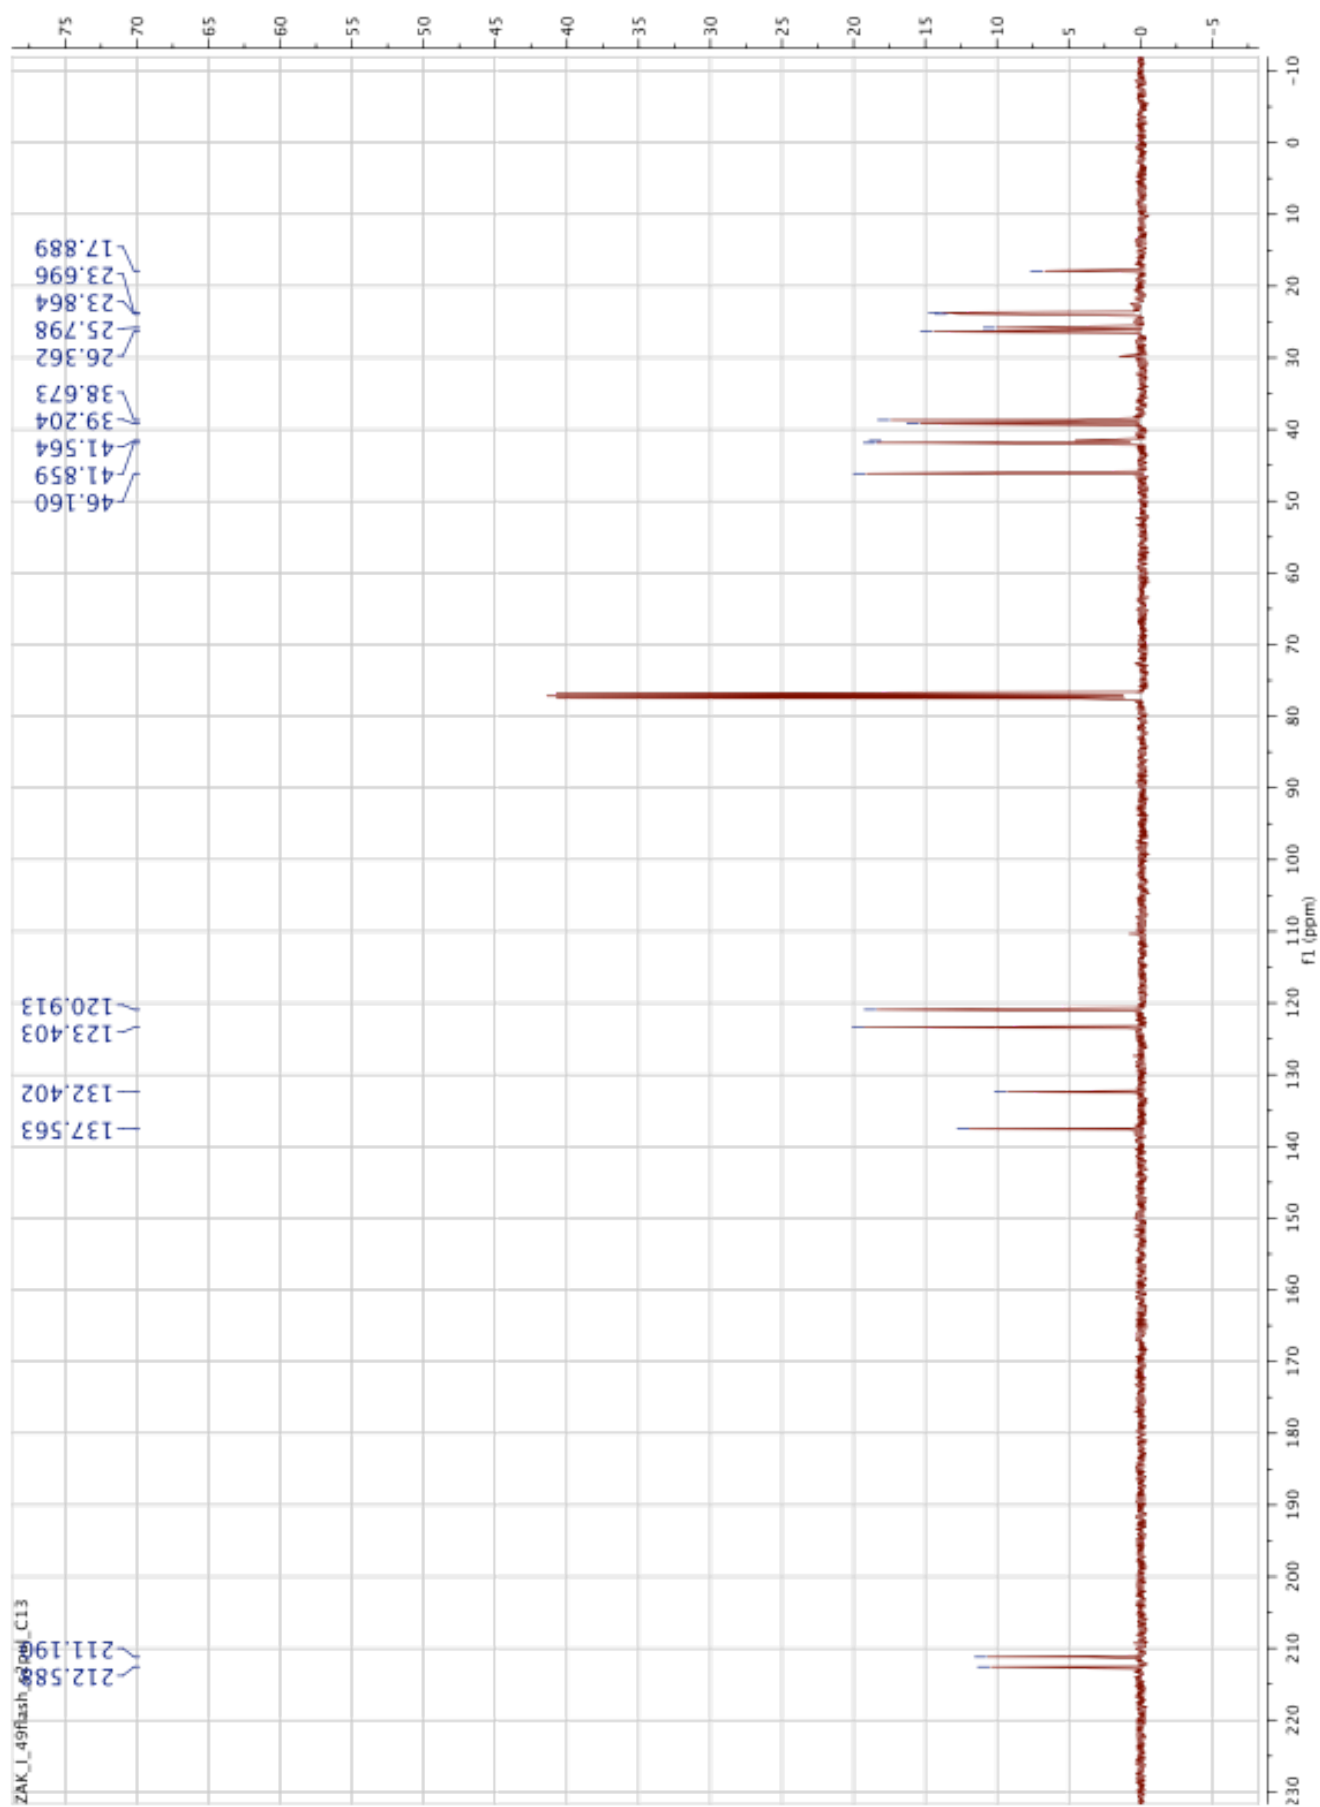



**(Z)-cycloundec-3-ene-1,6-dione (4g)**

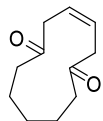

To an oven dried 2-dram vial equipped with a stir bar was added diacetoxyiodobenzene (38.7mg, 0.12 mmol, 120 mol%) and diol **3f** (18.2 mg, 0.10 mmol, 100 mol%). The vial was purged with argon, and dichloromethane was added (1.0 mL, 0.1M). The reaction was allowed to stir at ambient temperature for 2 hours. The volatiles were removed via rotary evaporation under reduced pressure. The residue was subjected to flash column chromatography (SiO<sub>2</sub>: 3:7, ethyl acetate: hexanes) to furnish cycloundecene **4g** (18.0 mg, 0.10 mmol, 99% yield) as a colorless solid.

**TLC (SiO<sub>2</sub>):** R<sub>f</sub> = 0.29 (3:7 ethyl acetate: hexanes).

**<sup>1</sup>H NMR (400 MHz, CDCl<sub>3</sub>):** δ 5.79 (ddd, *J* = 7.0, 5.4, 1.2 Hz), 3.23 (dd, *J* = 5.6, 1.5 Hz, 4H), 2.49-2.45 (m, 4H), 1.79-1.73 (m, 4H), 1.28 (quin., *J* = 7.1 Hz, 2H) ppm.

**<sup>13</sup>C NMR (100 MHz, CDCl<sub>3</sub>):** δ 211.0, 125.7, 43.0, 41.0, 27.3, 24.2 ppm.

**MP:** 77-79 °C.

**LRMS (ESI+):** Calculated for C<sub>11</sub>H<sub>16</sub>NaO<sub>2</sub><sup>+</sup> (*M*+Na<sup>+</sup>) 203.1; Found 203.1.

**FTIR (neat):** ν 2916, 2361, 1697, 1466, 1310, 1250, 1127, 704 cm<sup>-1</sup>.

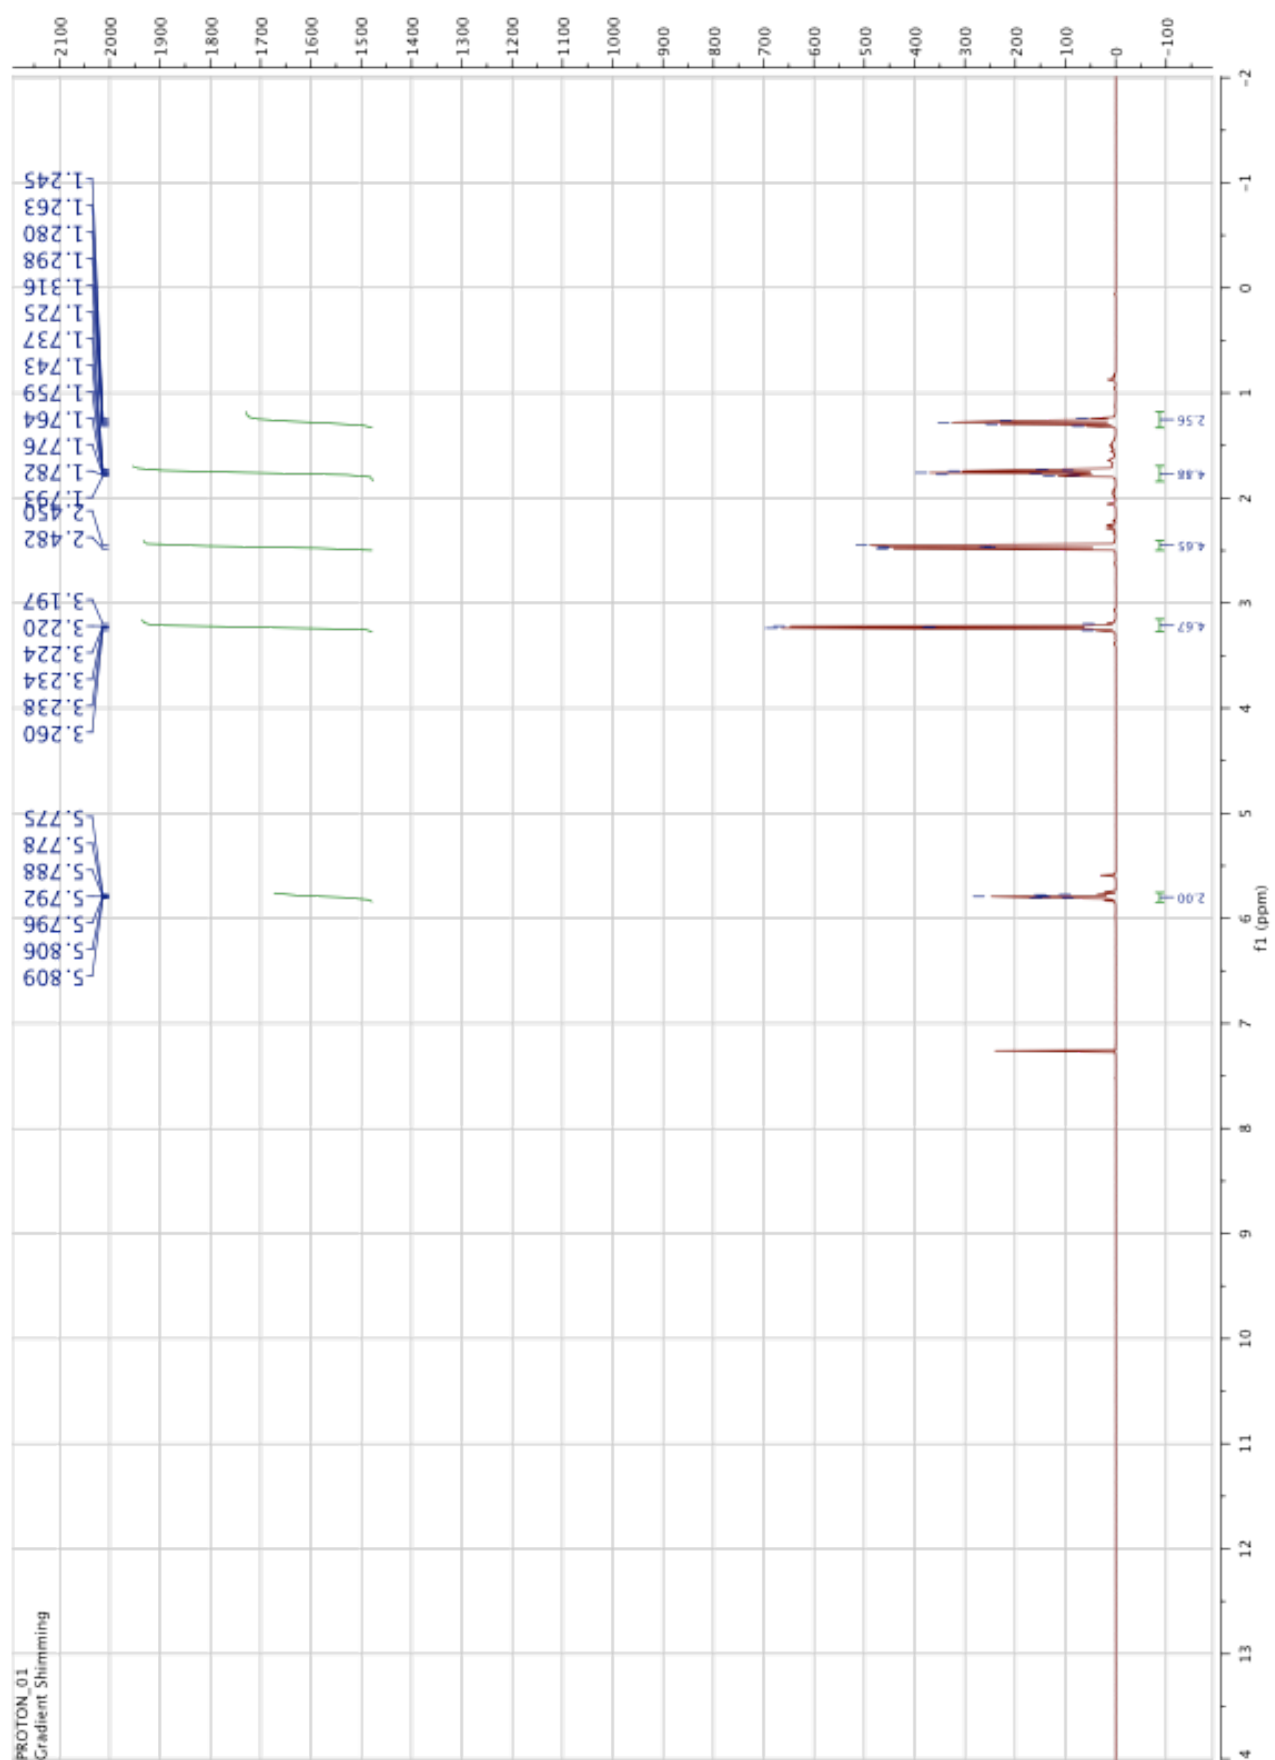

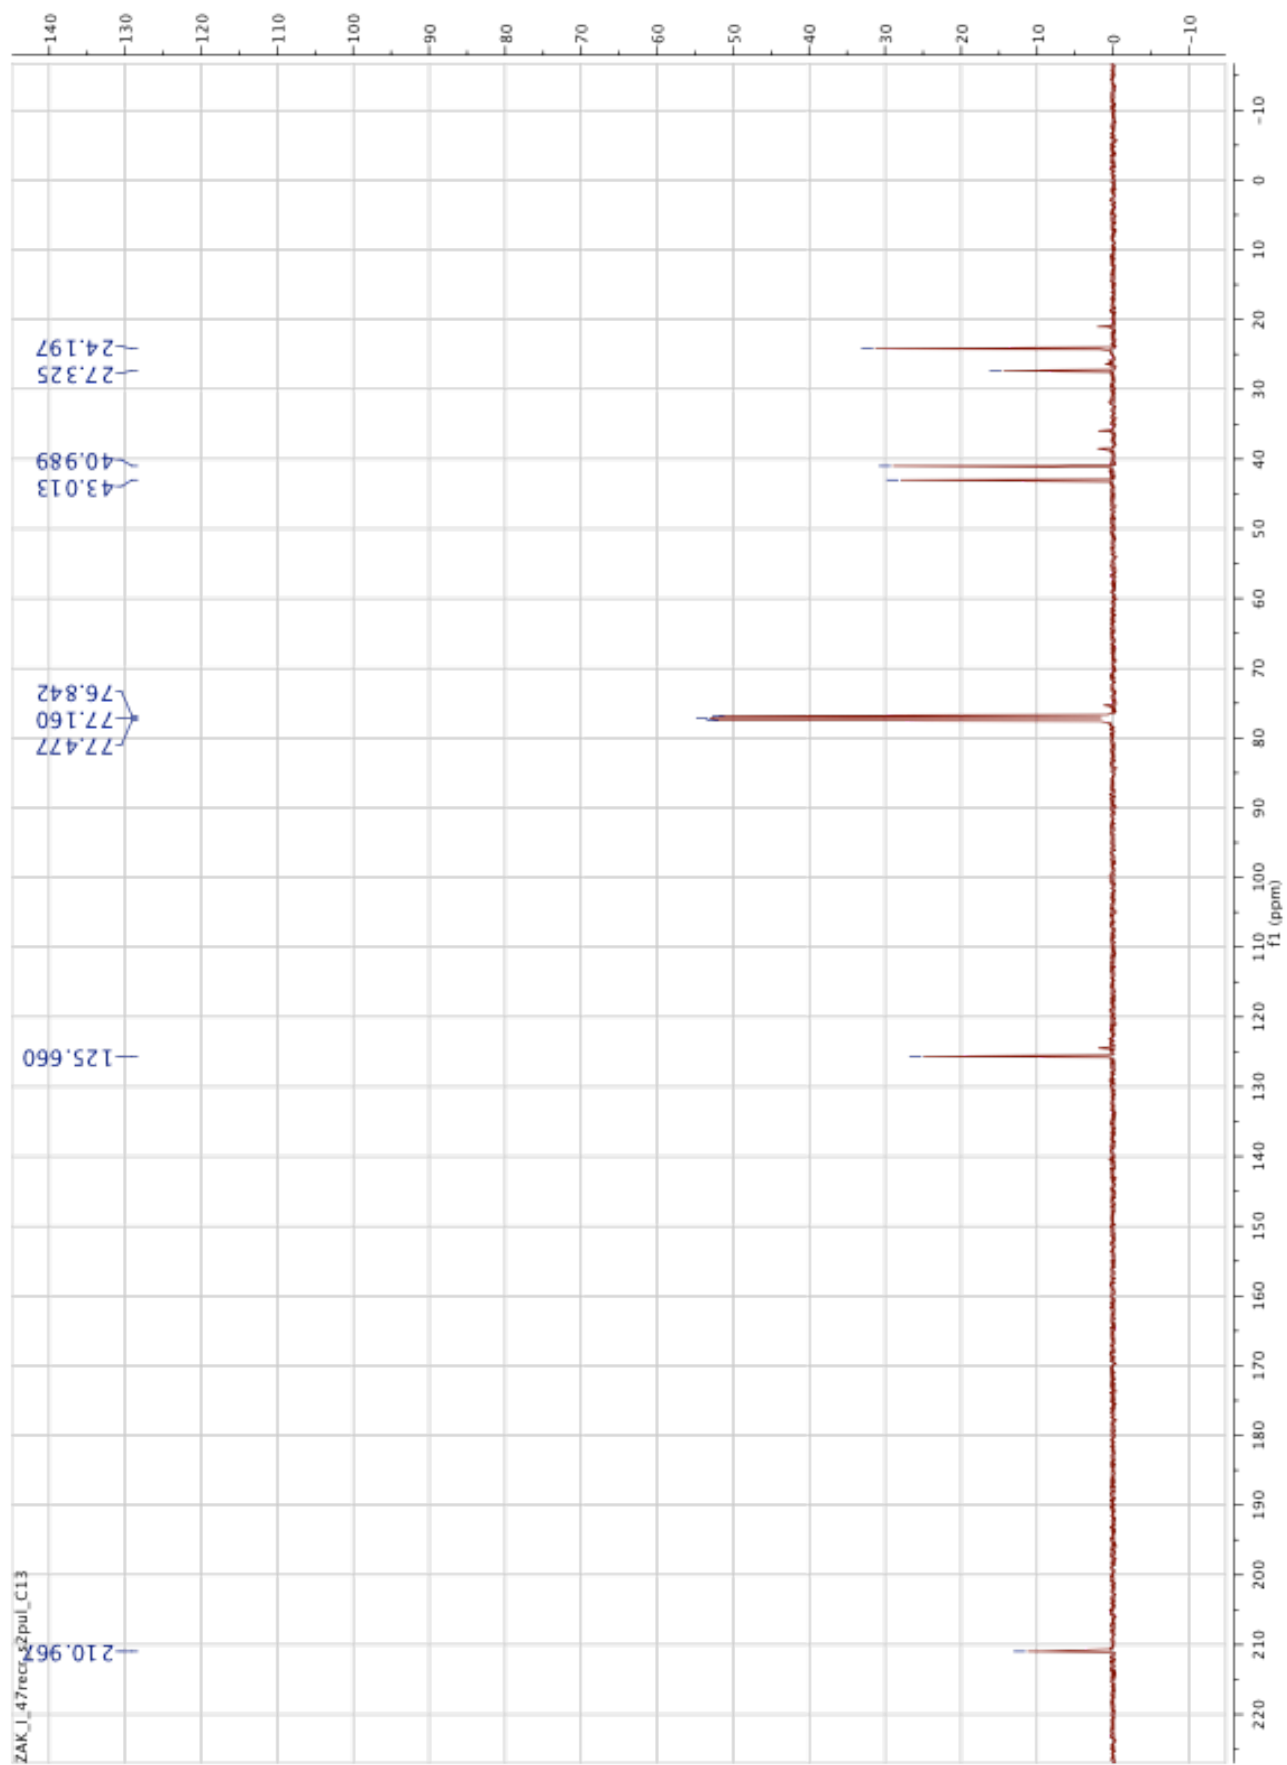

**(Z)-3-methylcycloundec-3-ene-1,6-dione (4h)**

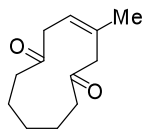

To an oven dried 2-dram vial equipped with a stir bar was added diacetoxyiodobenzene (38.7mg, 0.12 mmol, 120 mol%) and diol **3h** (19.6 mg, 0.10 mmol, 100 mol%). The vial was purged with argon, and dichloromethane was added (1.0 mL, 0.1M). The reaction was allowed to stir at ambient temperature for 3 hours. The volatiles were removed via rotary evaporation under reduced pressure. The residue was subjected to flash column chromatography (SiO<sub>2</sub>: 3:7, ethyl acetate: hexanes) to furnish cycloundecene **4h** (18.0 mg, 0.093 mmol, 93% yield) as a colorless solid.

**TLC (SiO<sub>2</sub>):** R<sub>f</sub> = 0.31 (3:7 ethyl acetate: hexanes).

**<sup>1</sup>H NMR (400 MHz, CDCl<sub>3</sub>):** δ 5.61 (t, *J* = 8.1 Hz, 1H), 3.19-3.17 (m, 4H), 2.47-2.41 (m, 4H), 1.92-1.90 (m, 3H), 1.80-1.70 (m, 4H), 1.33 (quin, *J* = 6.9 Hz, 2H) ppm.

**<sup>13</sup>C NMR (100 MHz, CDCl<sub>3</sub>):** δ 211.7, 210.4, 133.1, 120.9, 46.1, 42.5, 42.1, 42.0, 27.1, 25.6, 23.8, 23.7 ppm.

**MP:** 69-70 °C.

**LRMS (CI<sup>+</sup>):** Calculated for C<sub>12</sub>H<sub>19</sub>O<sub>2</sub><sup>+</sup> (M+H<sup>+</sup>) 195; Found 195.

**FTIR (neat):** ν 2916, 1697, 1465, 1430, 1329, 1309, 1249, 1138, 1015, 984, 880 cm<sup>-1</sup>.

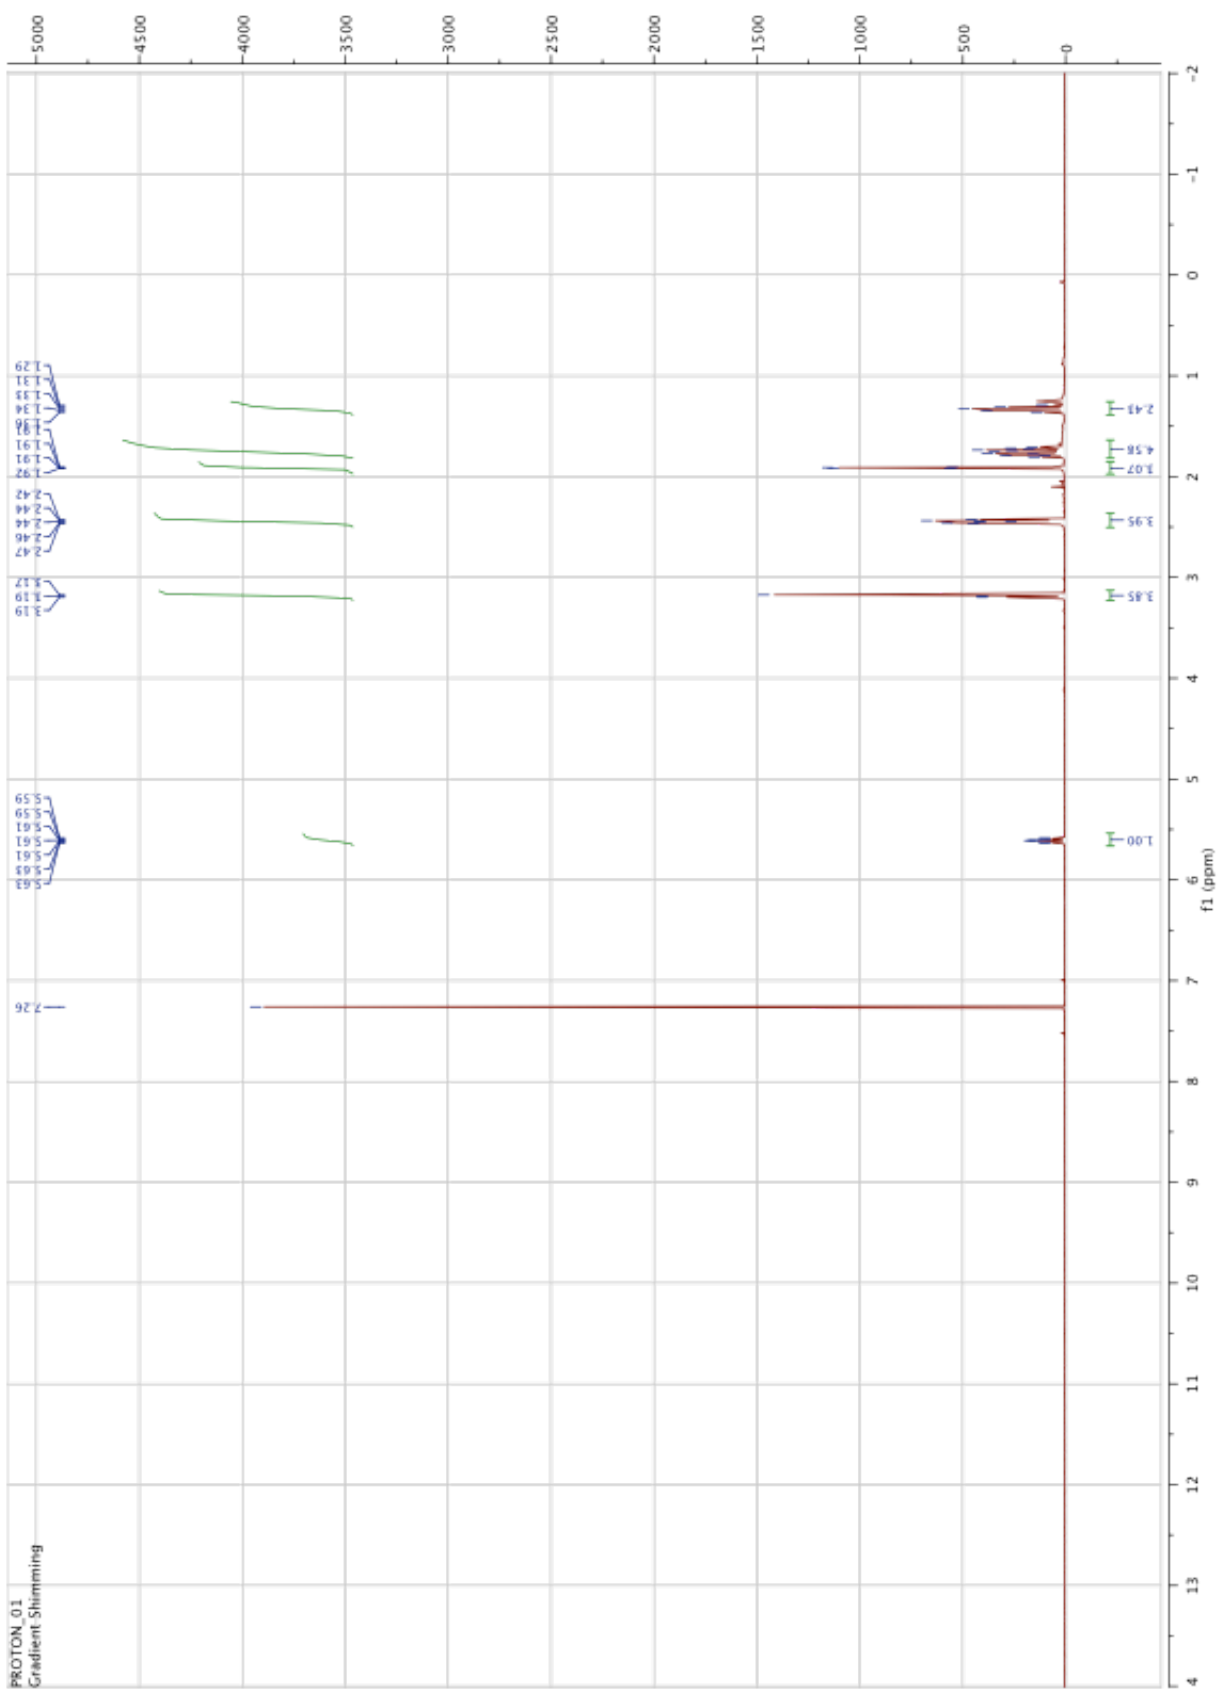

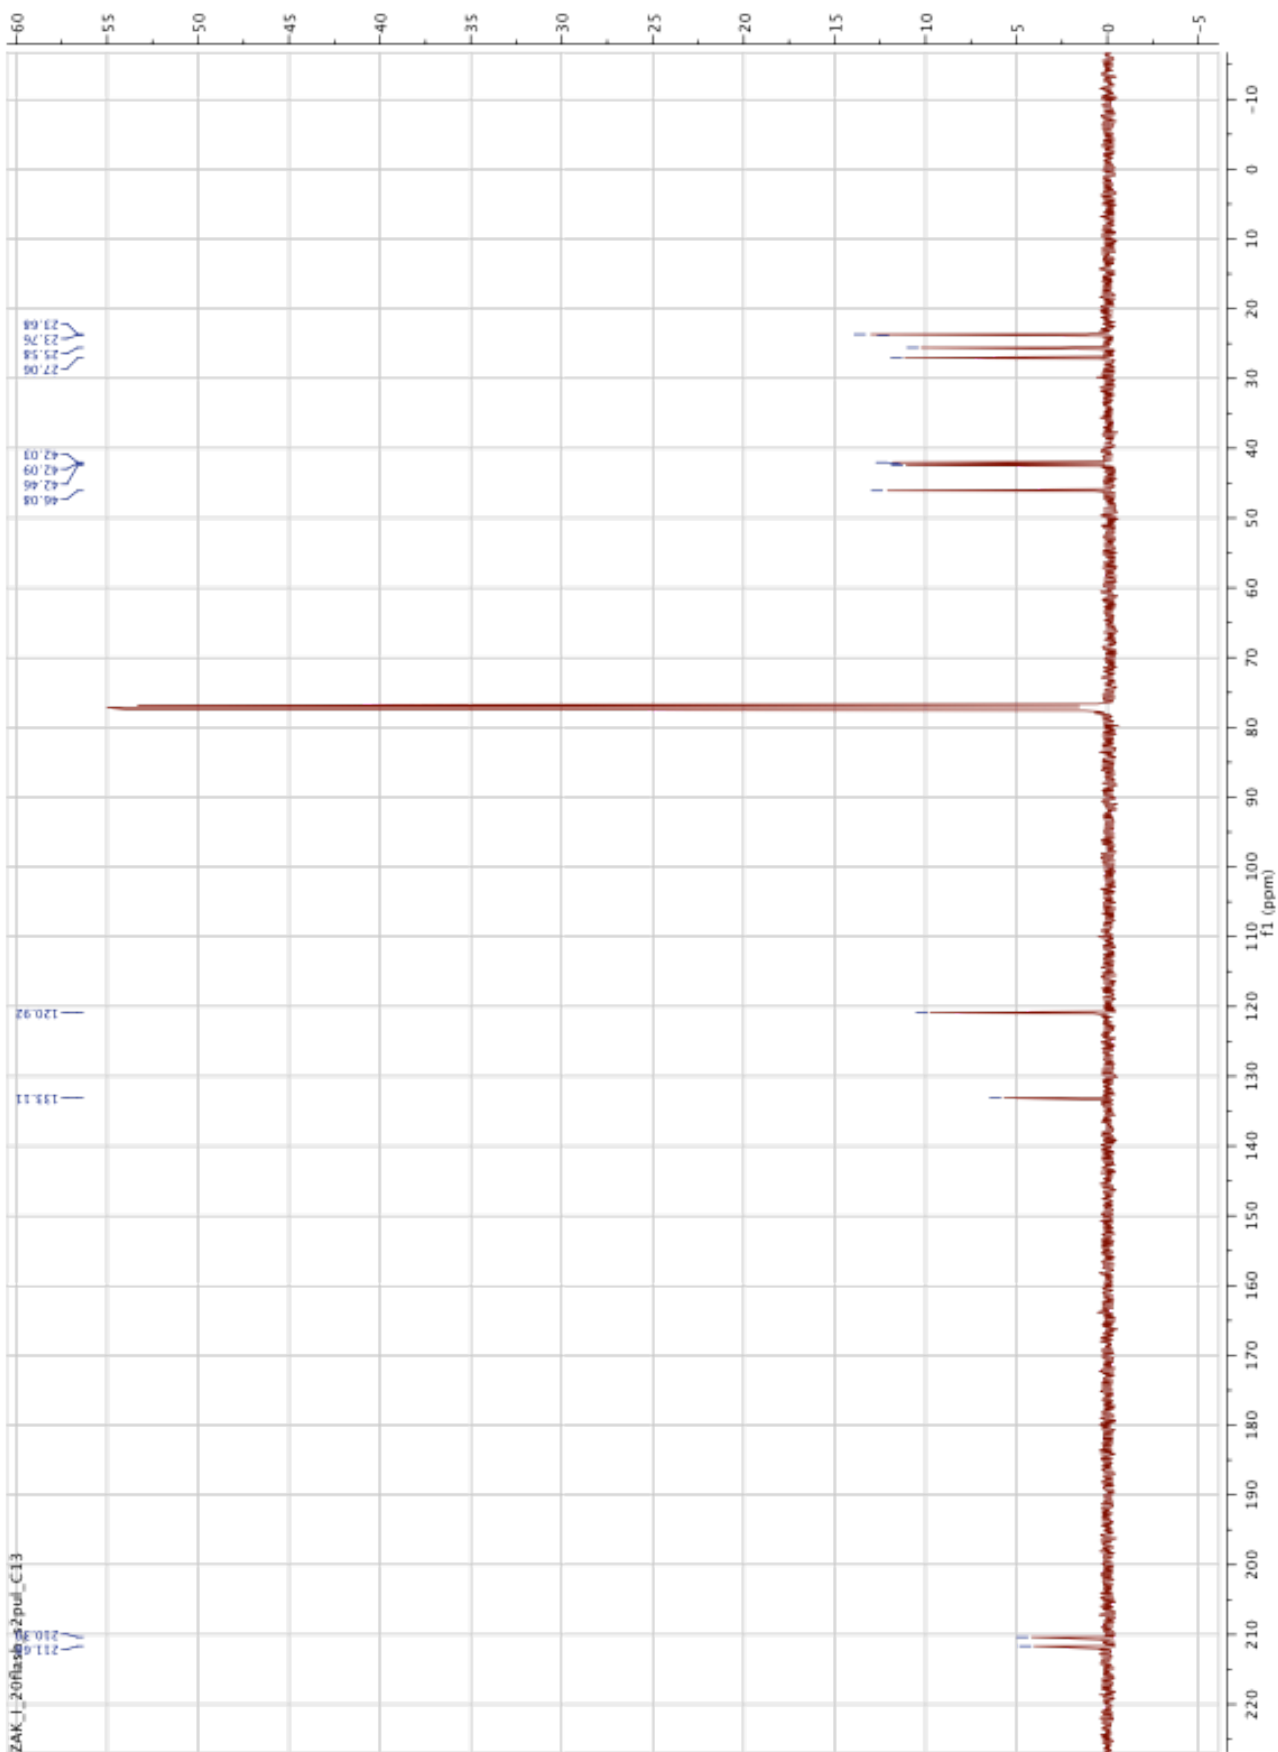

**(Z)-3-(4-methylpent-3-en-1-yl)cycloundec-3-ene-1,6-dione (4i)**

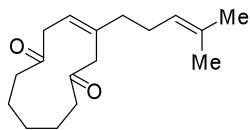

To an oven dried 2-dram vial equipped with a stir bar was added diacetoxyiodobenzene (38.7mg, 0.12 mmol, 120 mol%) and diol **3i** (26.4, 0.10 mmol, 100 mol%). The vial was purged with argon, and dichloromethane was added (1.0 mL, 0.1M). The reaction was allowed to stir at ambient temperature for 4 hours. The volatiles were removed via rotary evaporation under reduced pressure. (SiO<sub>2</sub>: 1:4- 3:7 ethyl acetate: hexanes) to furnish the cycloundecene **4i** (18.7 mg, 0.071 mmol, 71% yield) as a colorless solid.

**TLC (SiO<sub>2</sub>):** R<sub>f</sub> = 0.38 (3:7, ethyl acetate, hexanes).

**<sup>1</sup>H NMR (400 MHz, CDCl<sub>3</sub>):** δ 5.61 (t, *J* = 8.3Hz, 1H) 5.09-5.06 (m, 1H), 3.18 (d, *J* = 9.6 Hz, 2H), 3.17 (s, 2H), 2.45-2.41 (m, 4H), 2.24- 2.10, (m, 4H), 1.79-1.67 (m, 7H), 1.60 (s, 3H), 1.33 (quin., *J* = 6.6 Hz, 2H) ppm.

**<sup>13</sup>C NMR (100 MHz, CDCl<sub>3</sub>):** δ 211.6, 210.6, 136.7, 132.3, 123.6, 120.8, 44.9, 42.5, 42.0, 41.7, 38.6, 27.0, 26.3, 25.8, 23.7, 23.5, 17.9 ppm.

**MP:** 53-55 °C.

**LRMS (CI<sup>+</sup>):** Calculated for C<sub>17</sub>H<sub>27</sub>O<sub>2</sub><sup>+</sup> (M+H<sup>+</sup>) 263; Found 263.

**FTIR (neat):** ν 2921, 2361, 1699, 1432, 1327, 1164, 1101, 1020, 986, 768 cm<sup>-1</sup>.

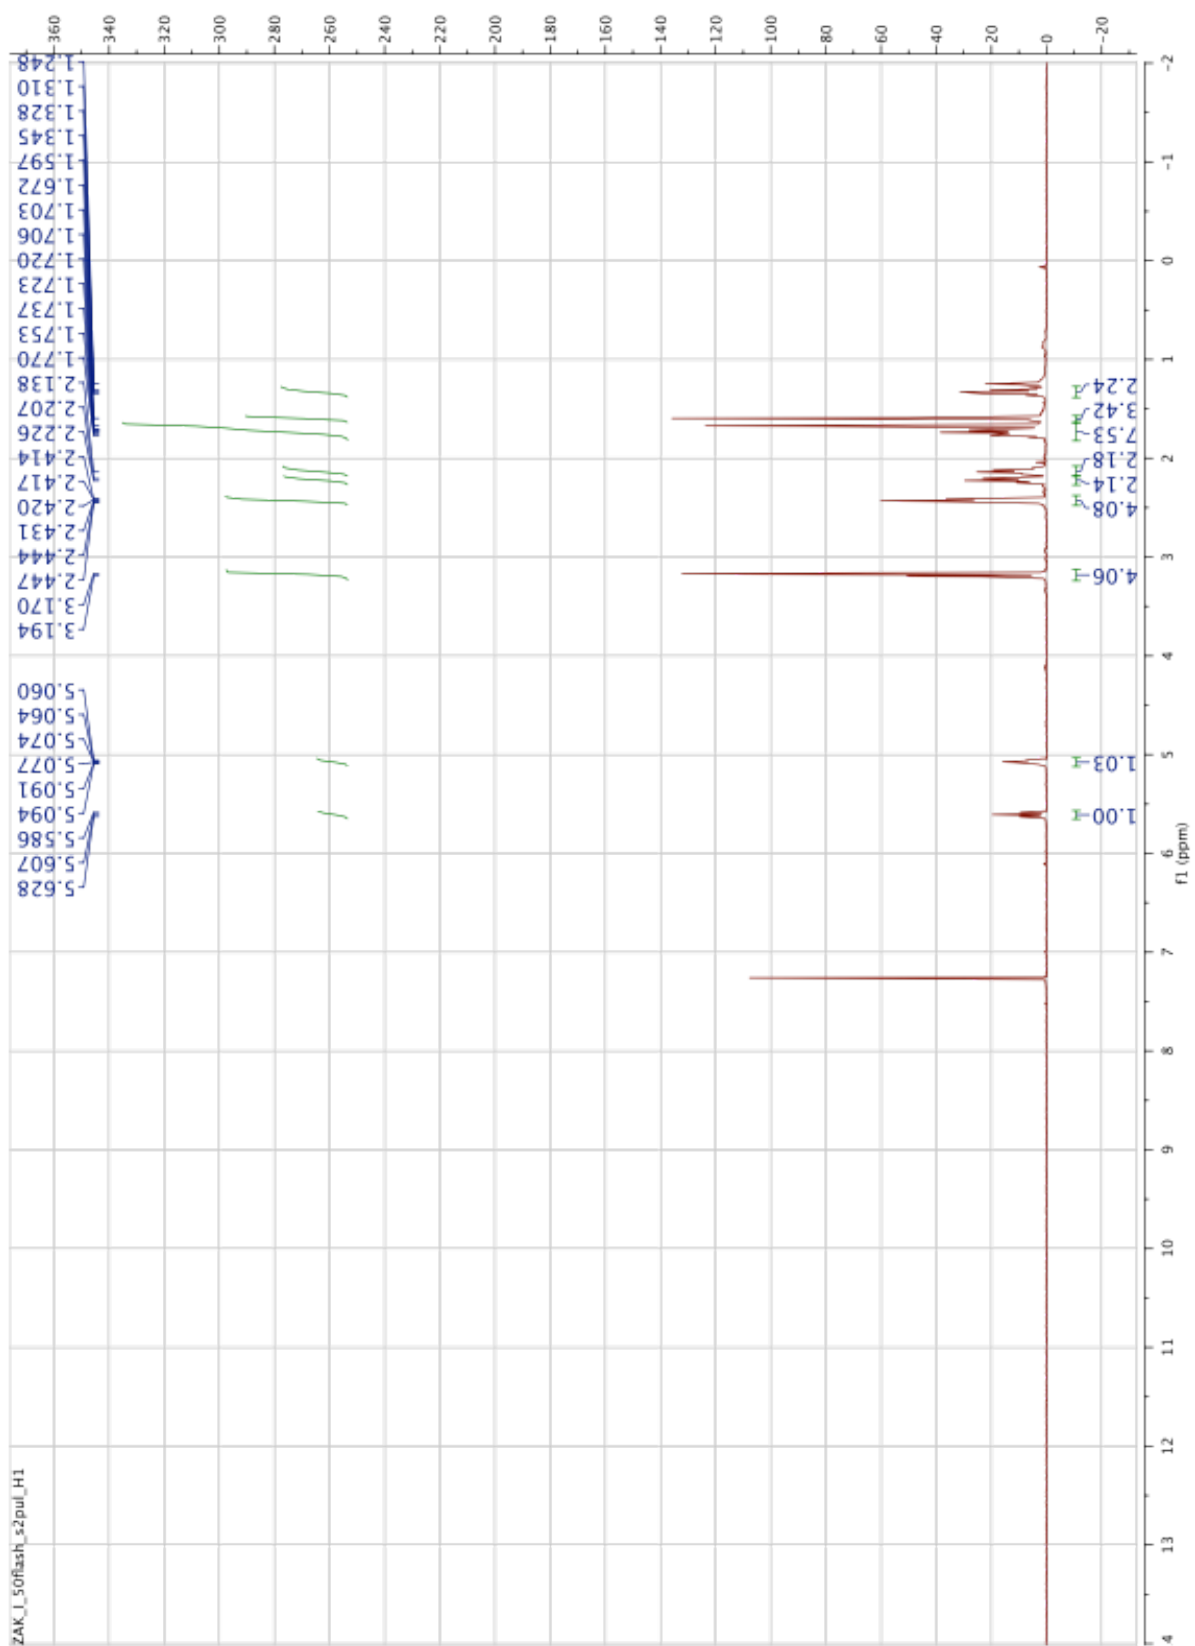



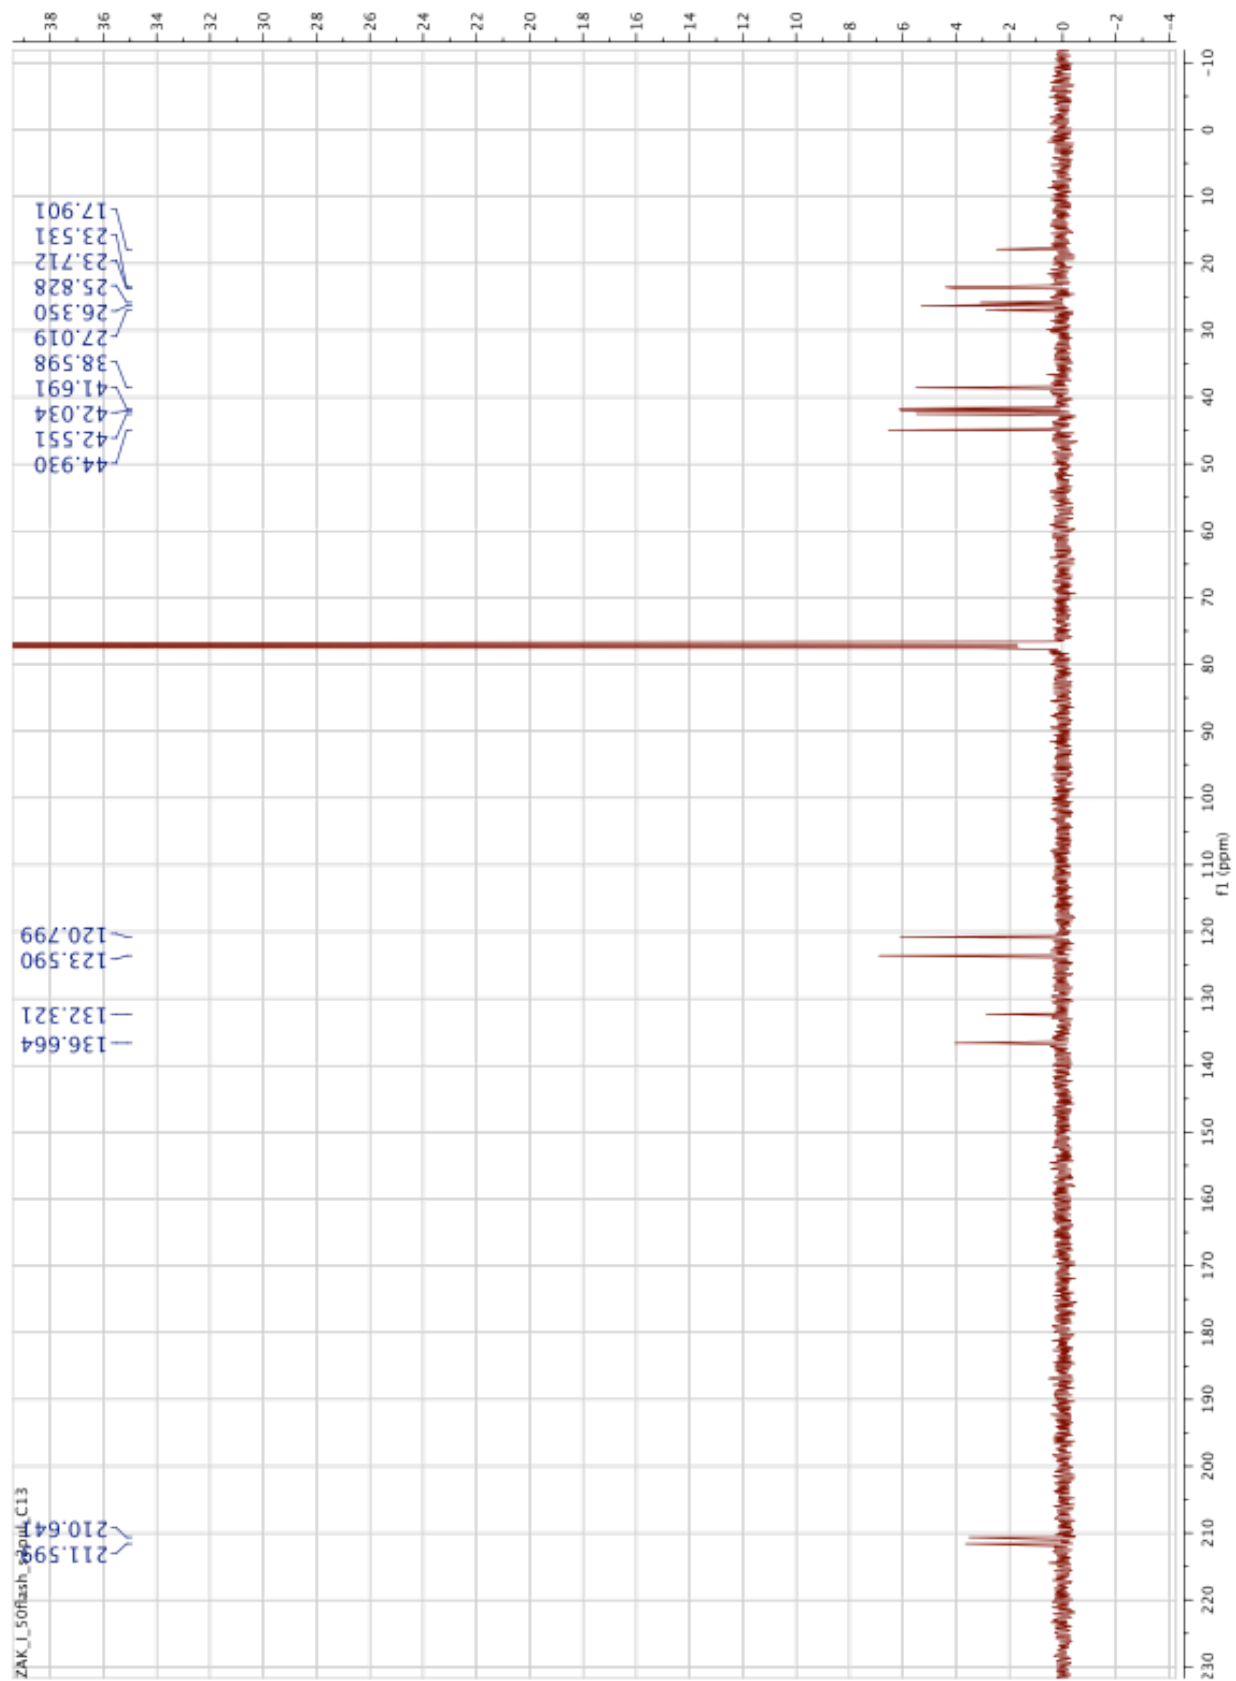

**(Z)-cyclododec-3-ene-1,6-dione (4j)**

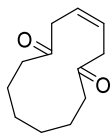

To an oven dried 2-dram vial equipped with a stir bar was added diacetoxyiodobenzene (38.7mg, 0.12 mmol, 120 mol%) and diol **3j** (19.6 mg, 0.10 mmol, 100 mol%). The vial was purged with argon, and dichloromethane was added (1.0 mL, 0.1M). The reaction was allowed to stir at ambient temperature for 2 hours. The volatiles were removed via rotary evaporation under reduced pressure. The residue was subjected to flash column chromatography (SiO<sub>2</sub>: 3:7, ethyl acetate: hexanes) to furnish the cyclododecene **4j** (19.4 mg, 0.10 mmol, 99% yield) as a colorless solid.

**TLC (SiO<sub>2</sub>):** R<sub>f</sub> = 0.30 (3:7, ethyl acetates: hexanes).

**<sup>1</sup>H NMR (400 MHz, CDCl<sub>3</sub>):** δ 5.88-5.79 (m, 2H), 3.21-3.18 (m, 4H), 2.41 (t, *J* = 6.4 Hz, 4H), 1.74-1.68 (m, 4H), 1.31-1.28 (m, 4H) ppm.

**<sup>13</sup>C NMR (100 MHz, CDCl<sub>3</sub>):** δ 210.8, 210.1, 132.8, 121.1, 46.4, 42.1, 41.5, 39.3, 25.9, 25.4, 25.1, 23.6, 23.0 ppm.

**MP:** 58-61 °C.

**LRMS (CI<sup>+</sup>):** Calculated for C<sub>12</sub>H<sub>19</sub>O<sub>2</sub><sup>+</sup> (M+H<sup>+</sup>) 195; Found 195.

**FTIR (neat):** ν 3031, 2909, 1696, 1416, 1333, 1098, 820, 736, 694 cm<sup>-1</sup>.

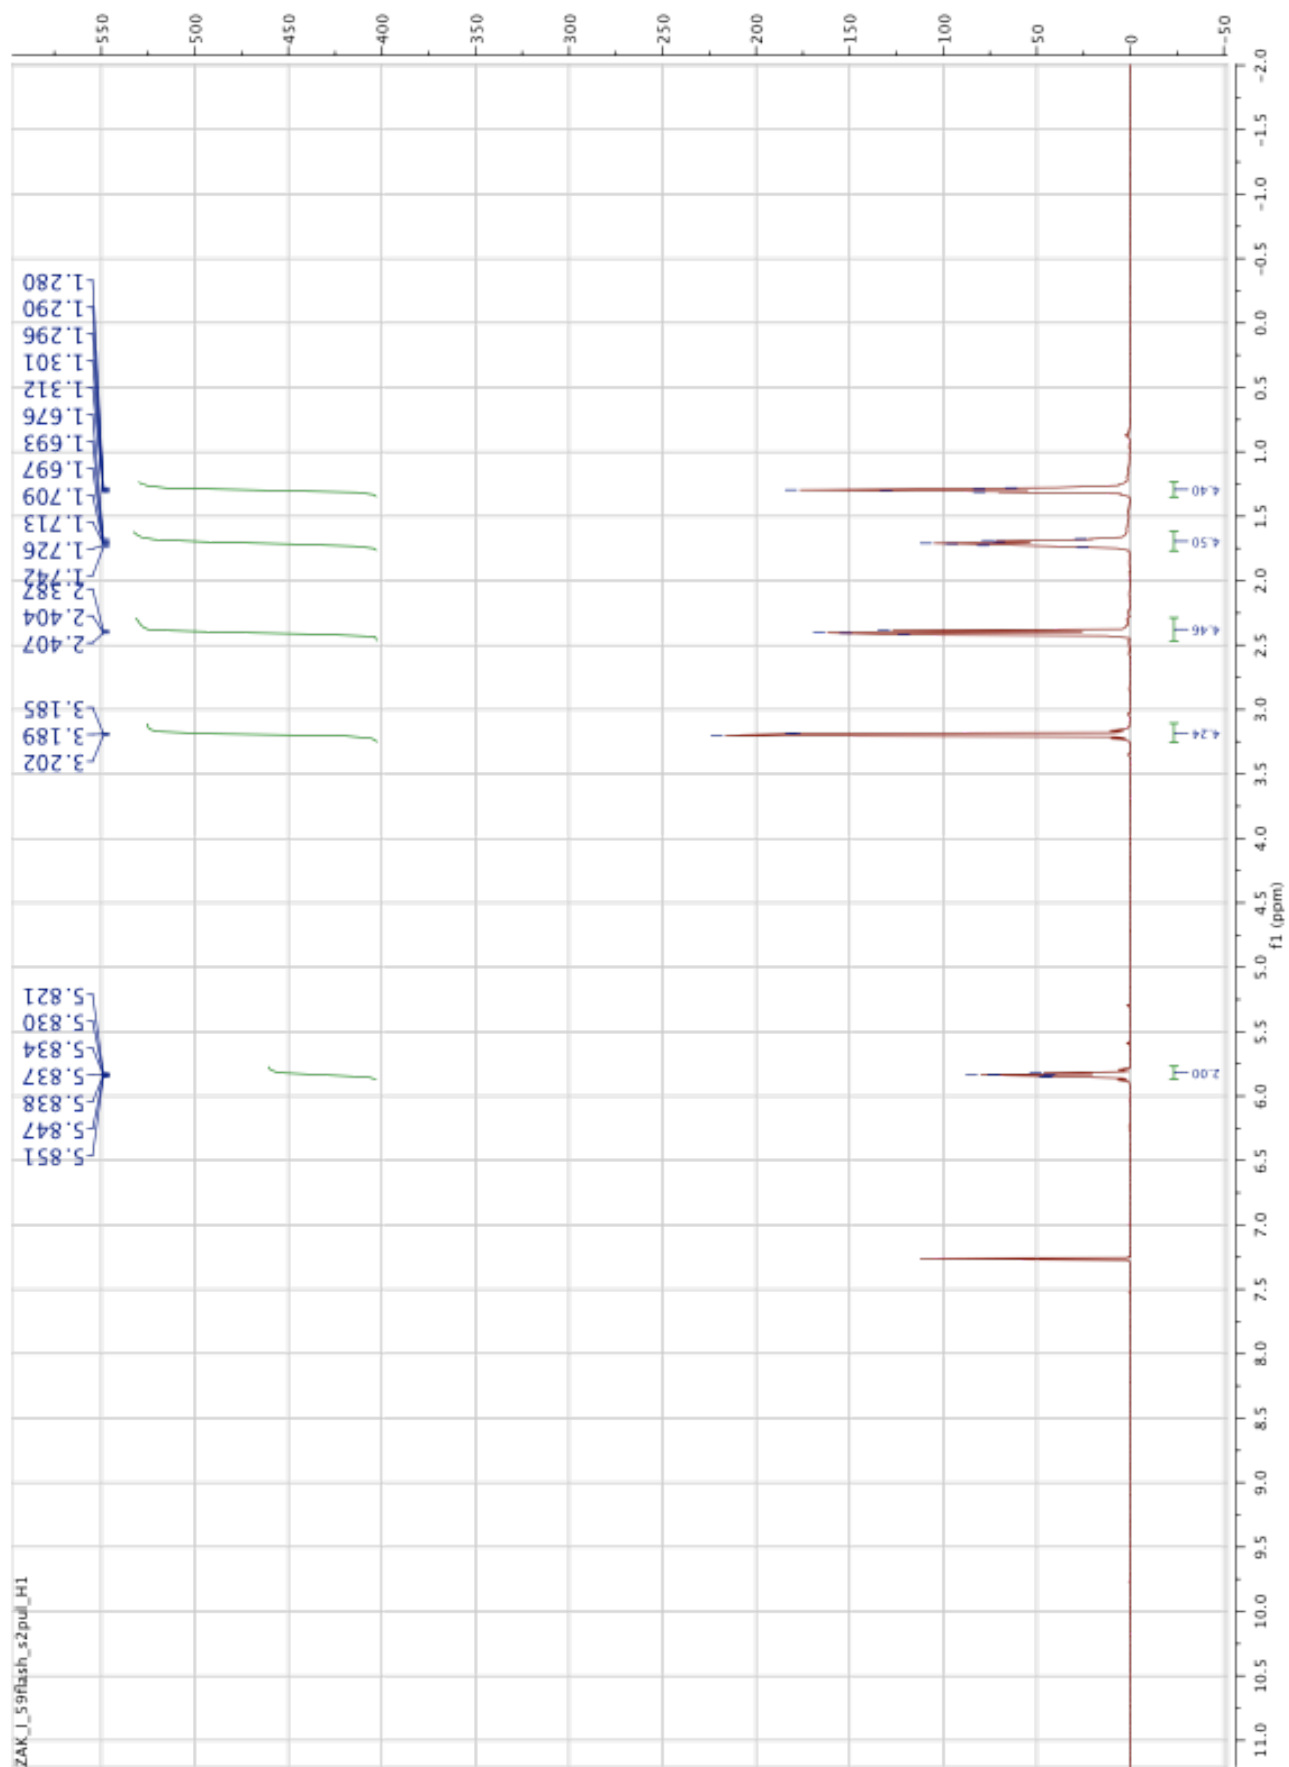

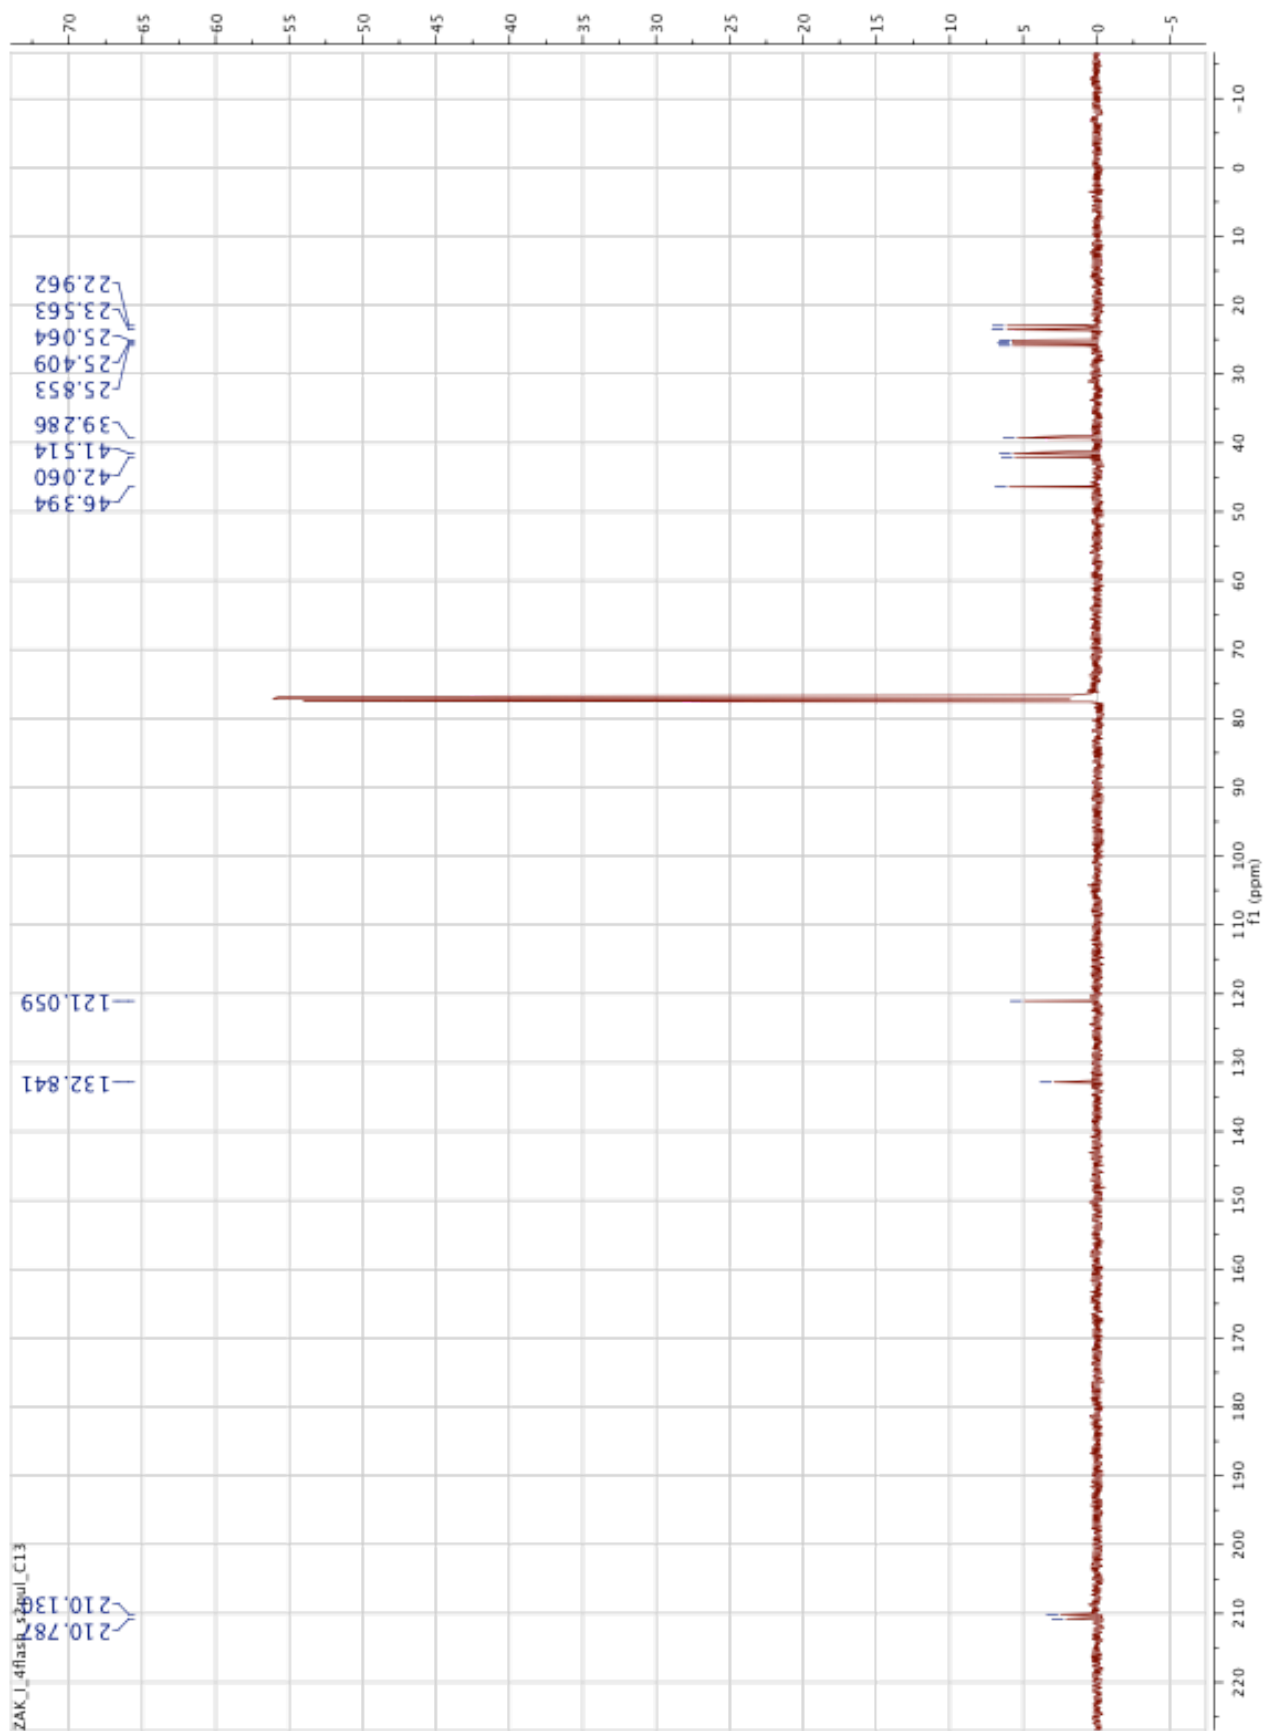

**(Z)-3-methyl-3-cyclododecene-1,6-dione (4k)**

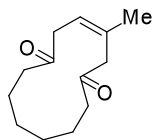

To an oven dried 2-dram vial equipped with a stir bar was added diacetoxyiodobenzene (38.7mg, 0.12 mmol, 120 mol%) and diol **3k** (21.0 mg, 0.10 mmol, 100 mol%). The vial was purged with argon, and dichloromethane was added (1.0 mL, 0.1M). The reaction was allowed to stir at ambient temperature for 2.5 hours. The volatiles were removed via rotary evaporation under reduced pressure. The residue was subjected to flash column chromatography (SiO<sub>2</sub>: 1:4, ethyl acetate: hexanes) to furnish the cyclododecene **4k** (17.1 mg, 0.082 mmol, 82% yield) as a colorless solid.

**TLC (SiO<sub>2</sub>):** R<sub>f</sub> = 0.43 (3:7, ethyl acetate: hexanes).

**<sup>1</sup>H NMR (400 MHz, CDCl<sub>3</sub>):** δ 5.65 (t, *J* = 8.4 Hz, 1H), 3.17 (d, *J* = 8.0 Hz, 2H), 3.14 (s, 2H), 2.42 (t, *J* = 6.4 Hz, 2H), 2.33 (t, *J* = 7.0 Hz, 2H), 1.84 (m, 3H), 1.69 (sep, *J* = 6.4 Hz, 4H), 1.37-1.24 (m, 4H) ppm.

**<sup>13</sup>C NMR (100 MHz, CDCl<sub>3</sub>):** δ 210.8, 210.1, 132.8, 121.1, 46.4, 42.0, 41.5, 39.3, 25.8, 25.4, 25.1, 23.6, 23.0 ppm.

**MP:** 77-78 °C.

**LRMS (CI<sup>+</sup>):** Calculated for C<sub>13</sub>H<sub>21</sub>O<sub>2</sub><sup>+</sup> (M+H<sup>+</sup>) 209; Found 209.

**FTIR (neat):** ν 2929, 2861, 2359, 1698, 1421, 1354, 1328, 1184, 1053 cm<sup>-1</sup>.

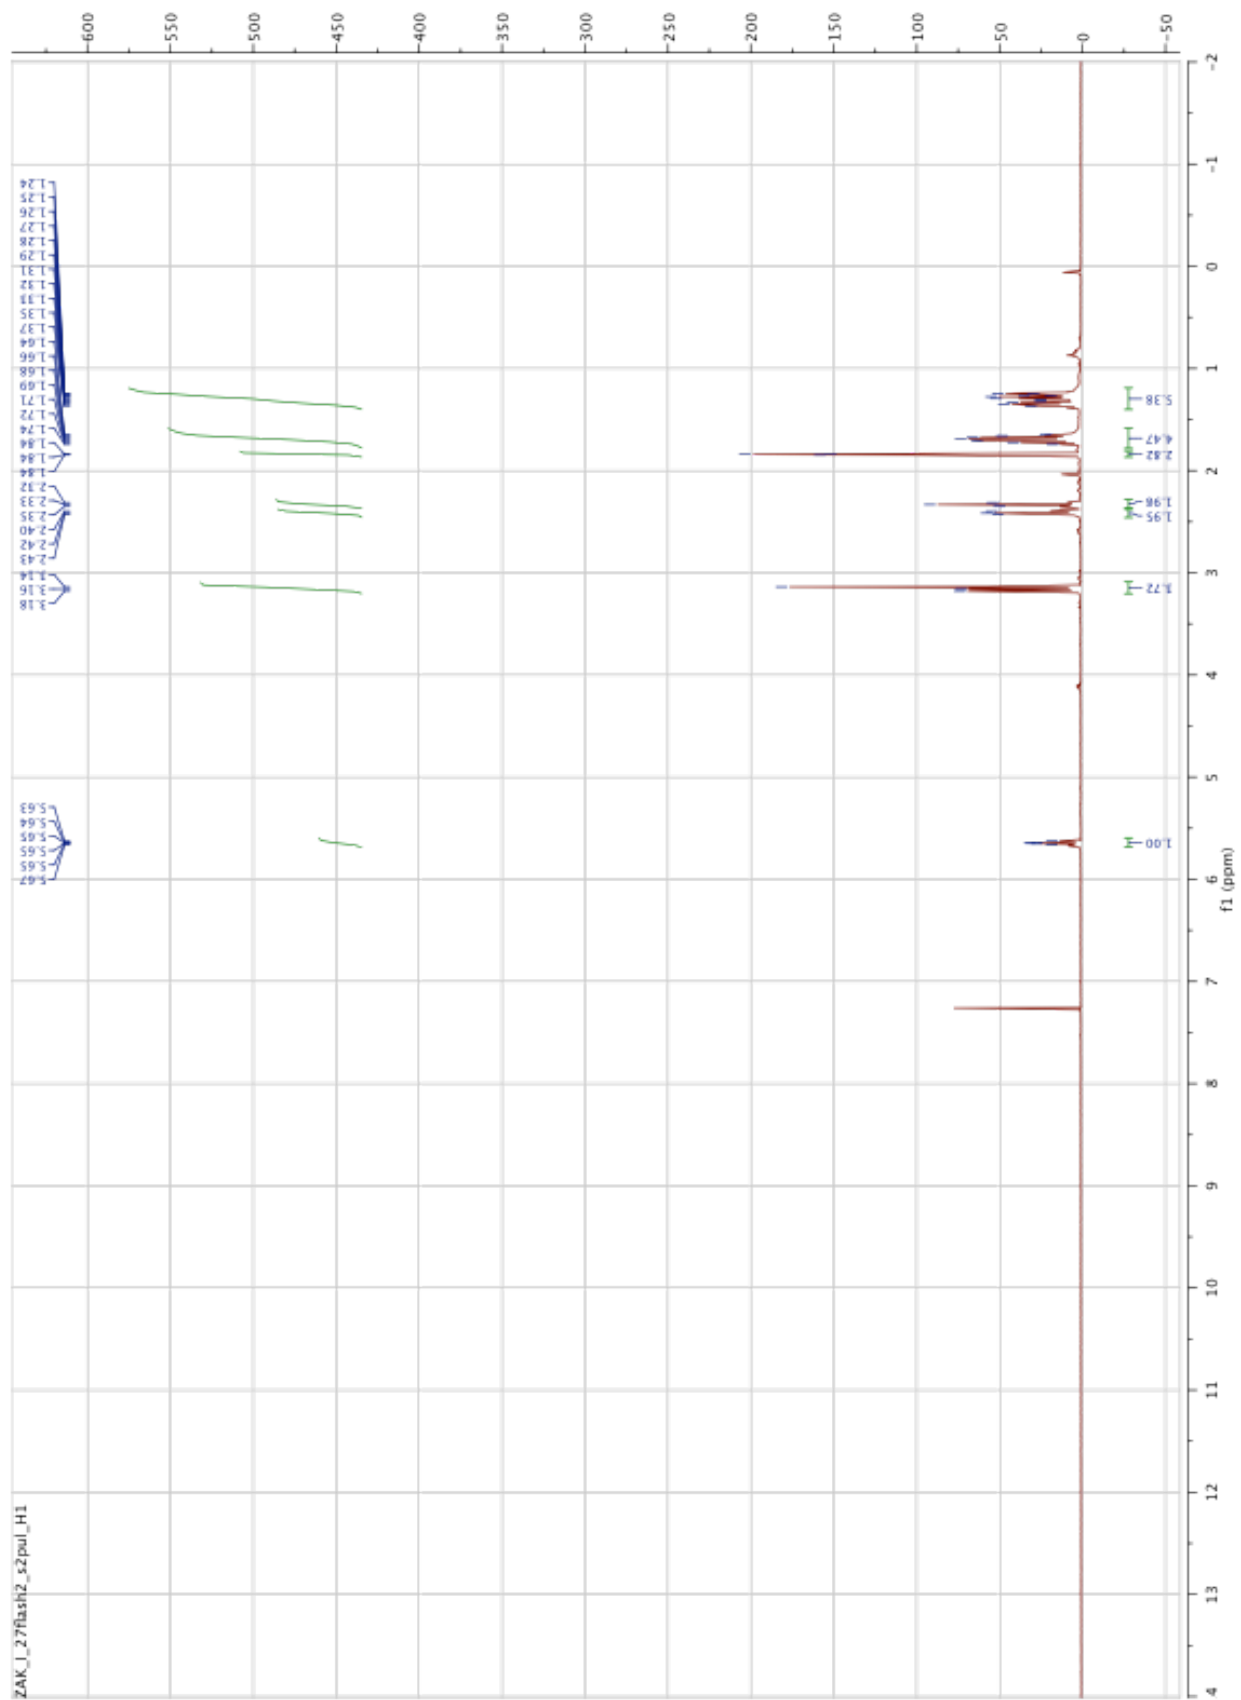

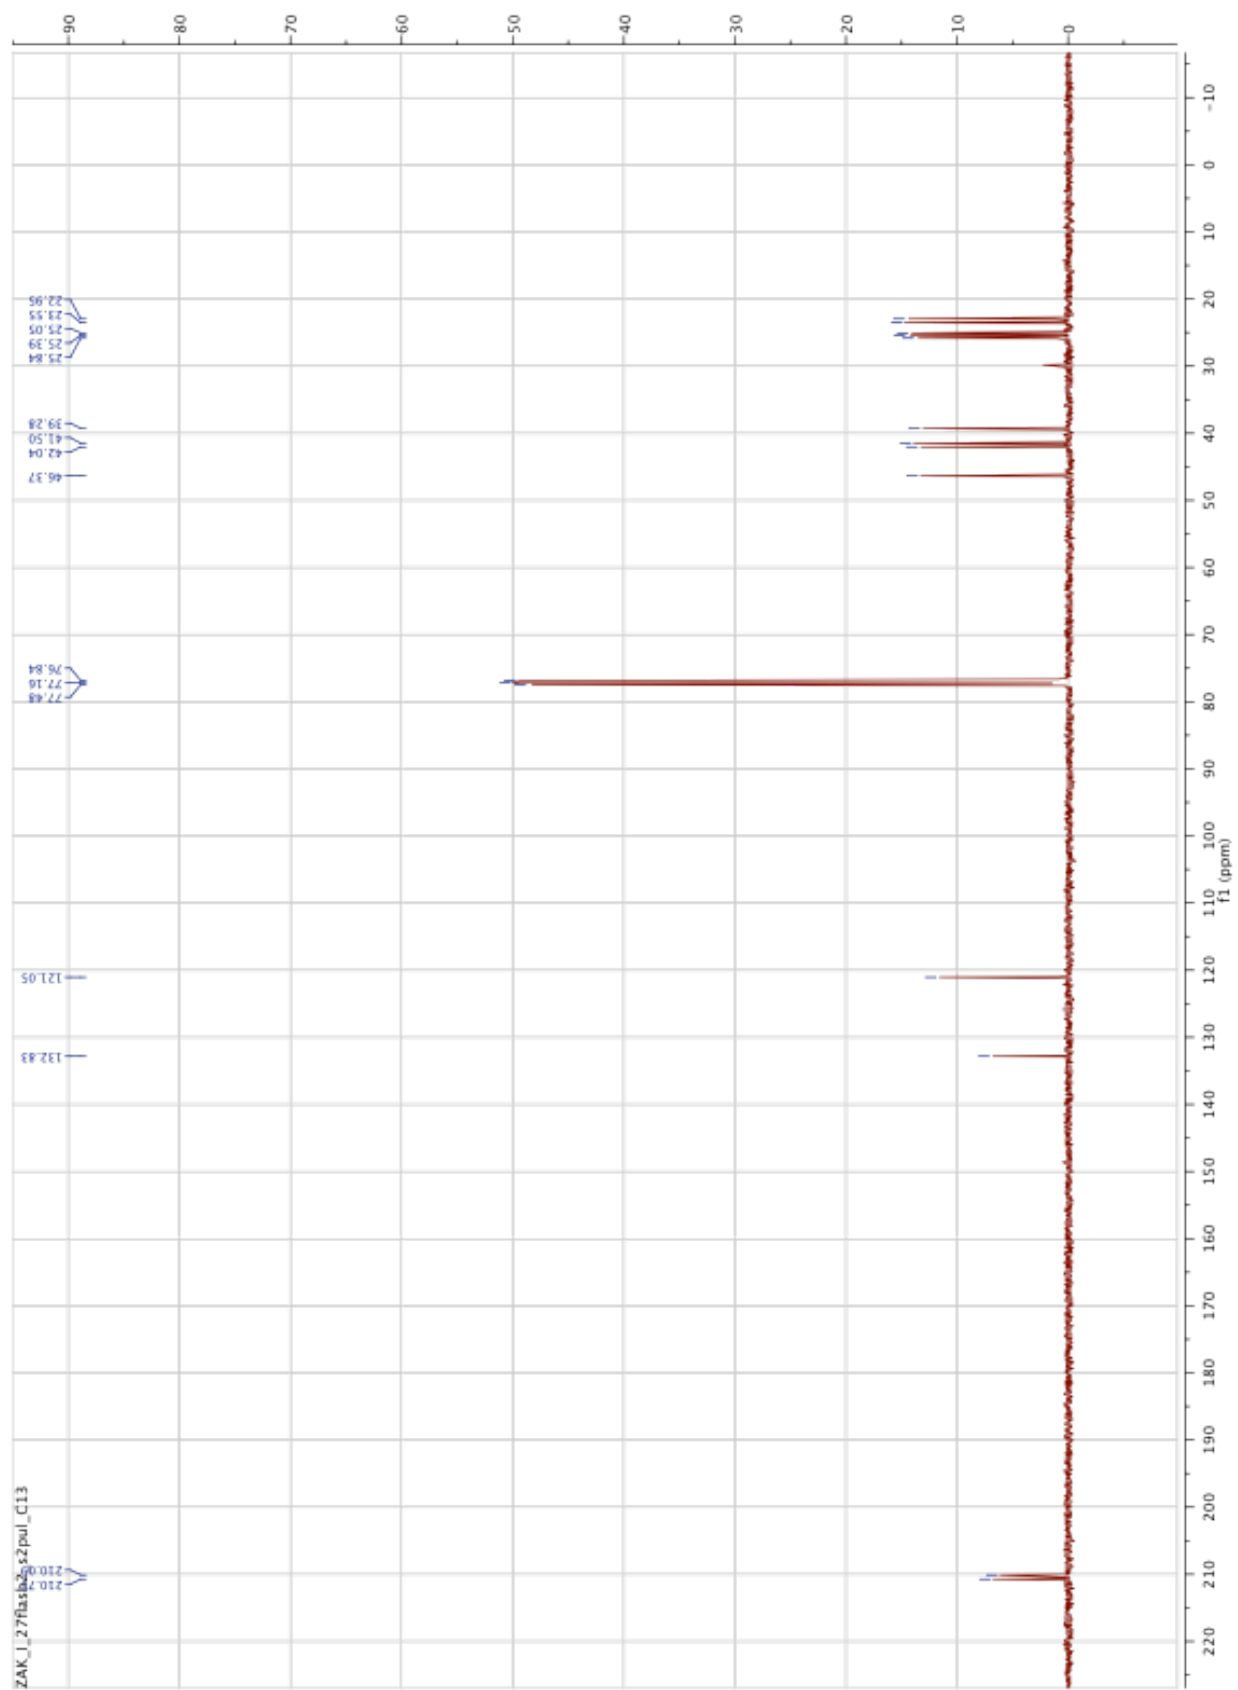

**(Z)-3-(4-Methylpent-3-en-1-yl)cyclododec-3-ene-1,6-dione (4I)**

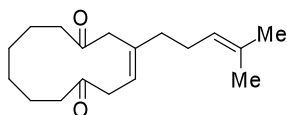

To an oven dried 2-dram vial equipped with a stir bar was added diacetoxyiodobenzene (79.2 mg, 0.246 mmol, 120 mol%) and diol **3I** (57.0 mg, 0.205 mmol, 100 mol%). The vial was purged with argon, and dichloromethane was added (1.0 mL, 0.1M). The reaction was allowed to stir at ambient temperature for 3 hours. The volatiles were removed via rotary evaporation under reduced pressure. The residue was subjected to flash column chromatography (SiO<sub>2</sub>: 1:4, ethyl acetate: hexanes) to furnish the cyclododecene **4I** (39.7 mg, 0.151 mmol, 70% yield) as a colorless solid.

**TLC (SiO<sub>2</sub>):** R<sub>f</sub> = 0.34 (1:4, ethyl acetate: hexanes).

**<sup>1</sup>H NMR (400 MHz, CDCl<sub>3</sub>):** δ 5.65 (t, 1H, *J* = 8 Hz), 5.05 (m, 1H), 3.17 (d, 1H, *J* = 8 Hz), 3.13 (s, 2H), 2.40 (m, 2H), 2.33 (t, 2H, *J* = 7 Hz), 2.12 (m, 4H), 1.74-1.62 (m, 4H), 1.65 (s, 3H), 1.58 (s, 3H), 1.34 (m, 2H), 1.25 (m, 2H) ppm.

**<sup>13</sup>C NMR (100 MHz, CDCl<sub>3</sub>):** δ 210.7, 210.2, 136.2, 132.1, 123.4, 120.7, 45.2, 41.8, 41.5, 38.7, 38.6, 26.2, 25.7, 25.6, 24.8, 23.5, 22.6, 17.7 ppm.

**LRMS (CI<sup>+</sup>):** Calculated for C<sub>18</sub>H<sub>29</sub>O<sub>2</sub> (M+H) 277; Found 277.

**FTIR (neat):** ν 2913, 1705, 1365, 1100 cm<sup>-1</sup>.



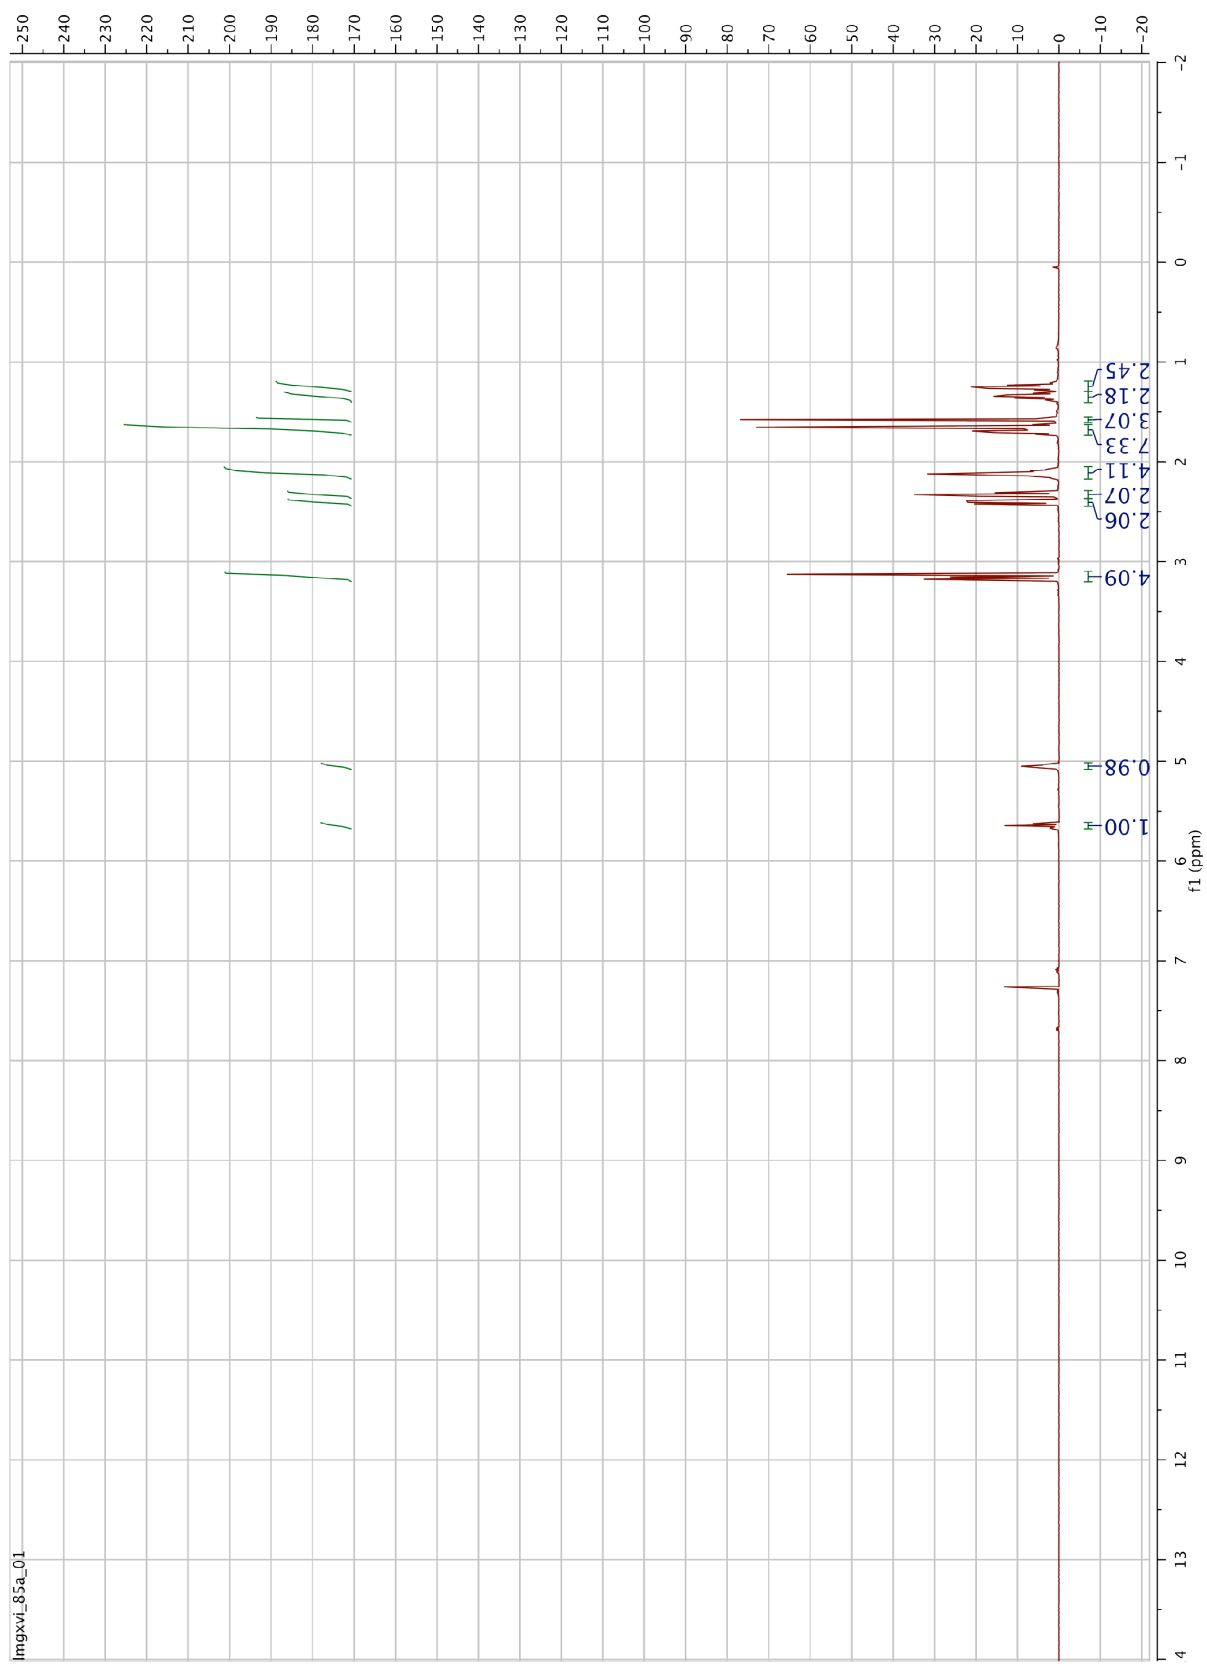

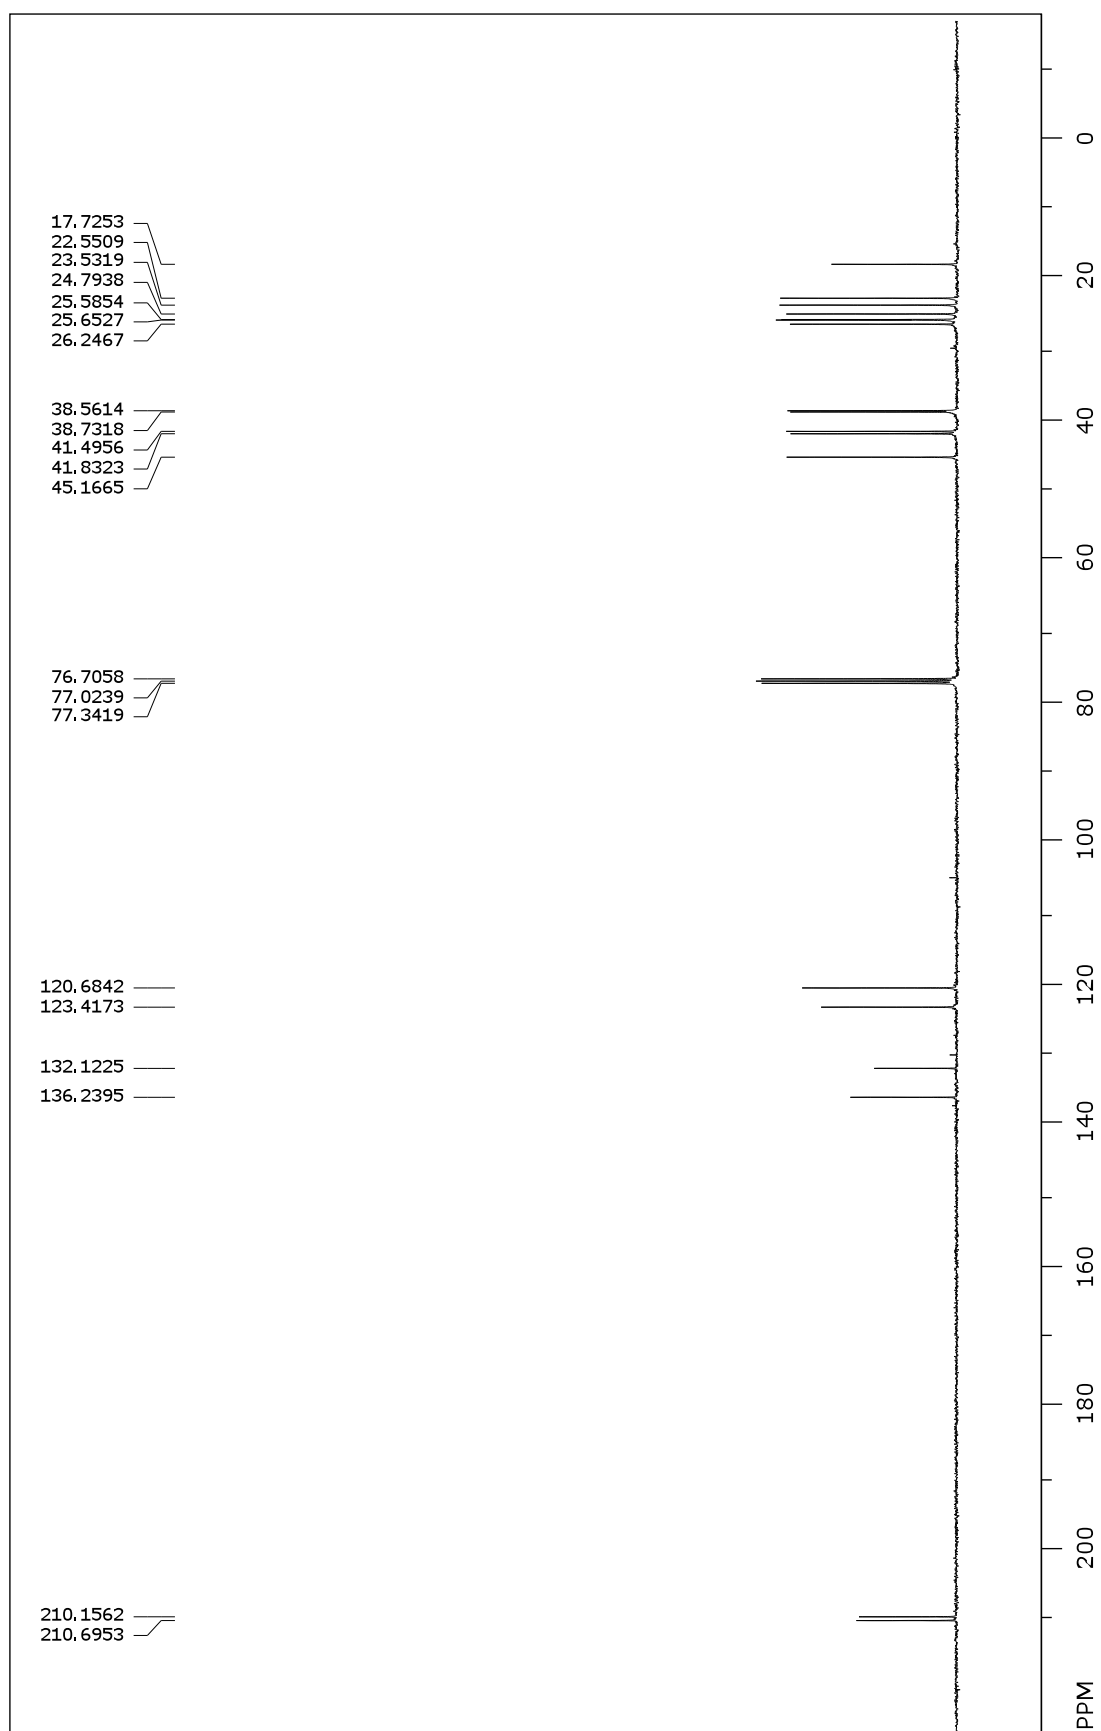

**(Z)-7,9-dihydrooxonine-3,8(2H,4H)-dione (4m) and (Z)-4,5-dihydrooxonine-3,8(2H,9H)-dione (iso-4m)**

To an oven dried 2-dram vial equipped with a stir bar was added diacetoxyiodobenzene (99.0 mg, 0.307 mmol, 120 mol%) and diols **3m** and *iso-3m* (57.0 mg, 0.205 mmol, 100 mol%, 5.2:1 mixture). The vial was purged with argon, and dichloromethane was added (1.0 mL, 0.1M). The reaction was allowed to stir at ambient temperature for 3 hours. The volatiles were removed via rotary evaporation under reduced pressure. The residue was subjected to flash column chromatography (SiO<sub>2</sub>: 1:9, ethyl acetate: hexanes) to furnish the diones **4m** (32.1 mg, 0.208, 81% yield) and *iso-4m* (6.8 mg, 0.044, 11% yield) as a colorless solid and a colorless oil, respectively.

**(Z)-7,9-dihydrooxonine-3,8(2H,4H)-dione (4m)**

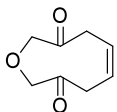

**TLC (SiO<sub>2</sub>):** R<sub>f</sub> = 0.38 (2:3, ethyl acetate: hexanes).

**<sup>1</sup>H NMR (400 MHz, CDCl<sub>3</sub>):** δ 5.68-5.59 (m, 2H), 4.06 (s, 4H), 3.60-3.45 (m, 4H) ppm.

**<sup>13</sup>C NMR (100 MHz, CDCl<sub>3</sub>):** δ 207.6, 125.5, 78.6, 41.0 ppm.

**MP:** 63-65 °C.

**LRMS (CI<sup>+</sup>):** Calculated for C<sub>8</sub>H<sub>21</sub>O<sub>3</sub> (M+H) 155; Found 155.

**FTIR (neat):** ν 2903, 2359, 1703, 1273, 1166, 1123, 1025, 825, 721 cm<sup>-1</sup>.

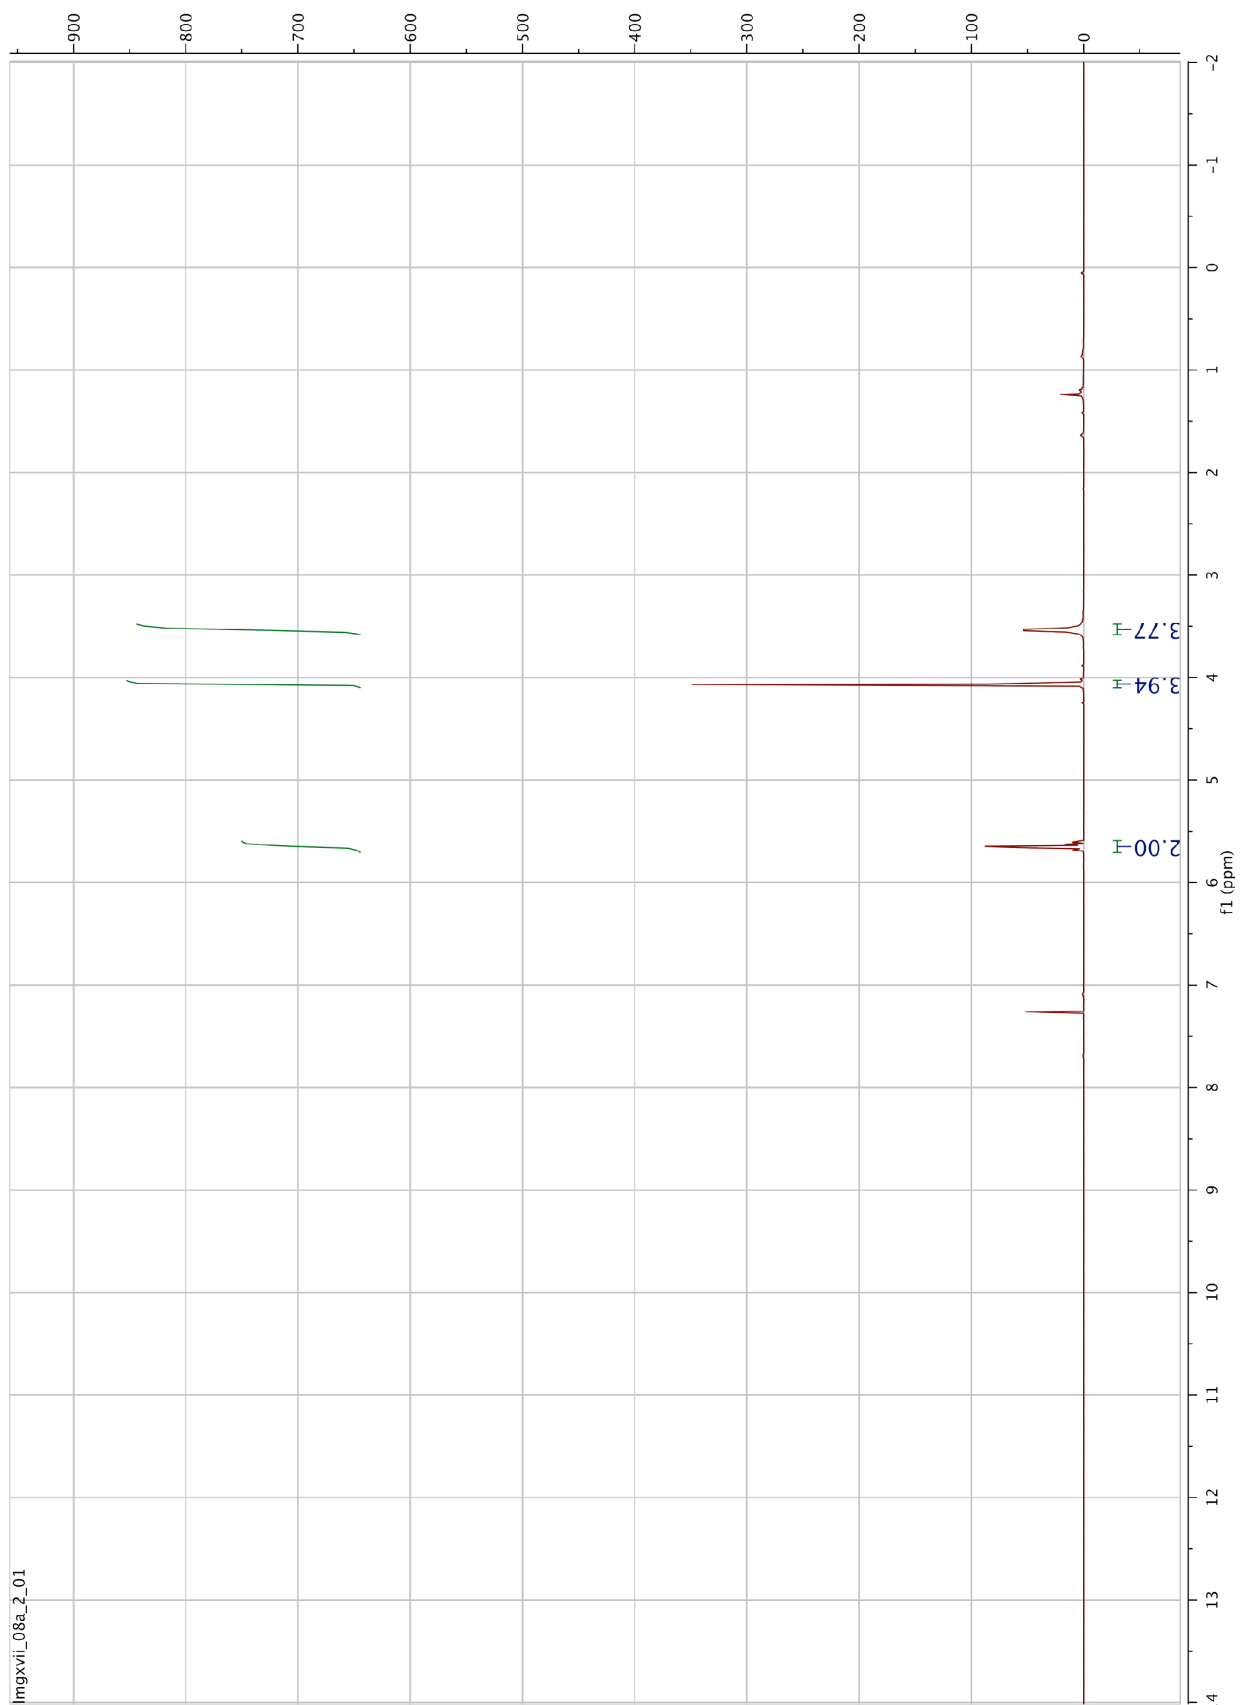

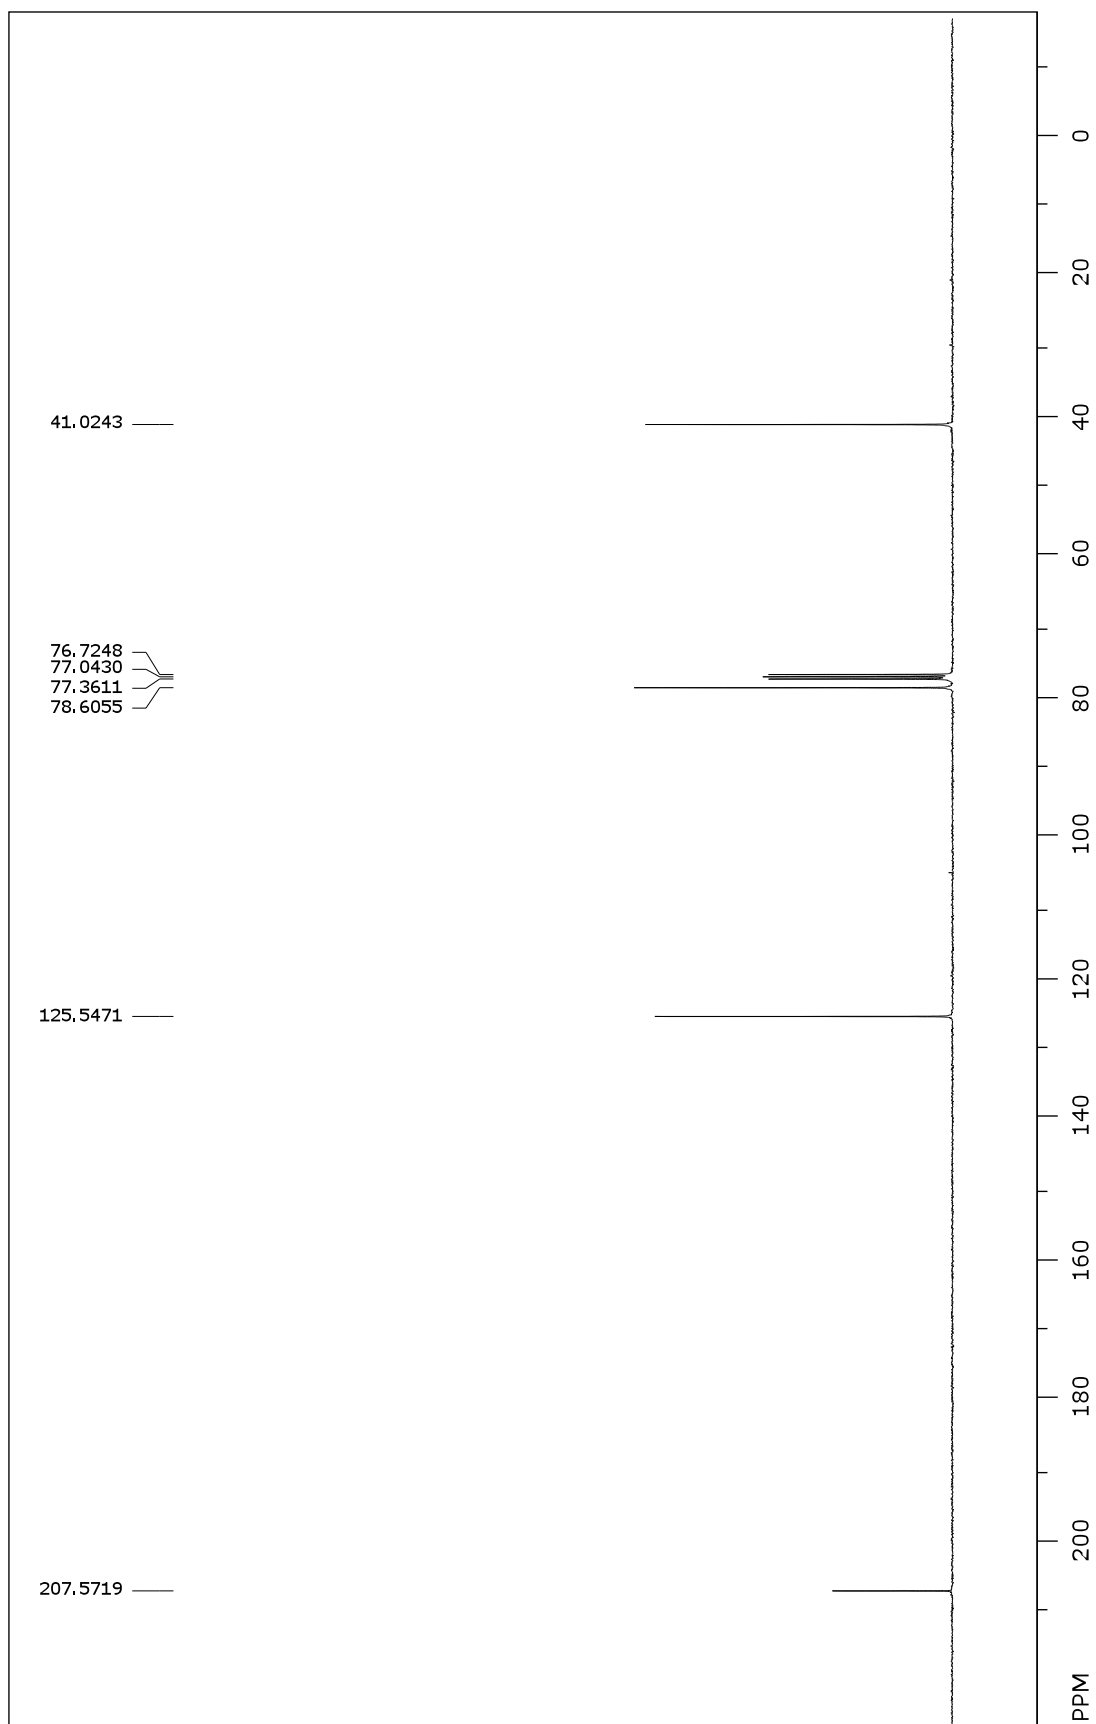

**(Z)-4,5-dihydrooxonine-3,8(2H,9H)-dione (iso-4m)**

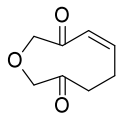

**TLC (SiO<sub>2</sub>)**: R<sub>f</sub> = 0.26 (2:3 Ethyl acetate: hexanes).

**<sup>1</sup>H NMR (400 MHz, CDCl<sub>3</sub>)**: δ 6.46 (ddd, 1H, *J* = 2.5, 9, 12 Hz), 5.94 (d, 1H, *J* = 12 Hz), 4.36 (s, 2H), 4.20 (s, 2H), 2.80-2.65 (m, 4H) ppm.

**<sup>13</sup>C NMR (100 MHz, CDCl<sub>3</sub>)**: δ 210.5, 201.5, 142.8, 129.3, 79.3, 77.5, 41.3, 24.4 ppm.

**LRMS (CI+)**: Calculated for C<sub>8</sub>H<sub>21</sub>O<sub>3</sub> (M+H) 155; Found 155.

**FTIR (neat)**: ν 2925, 2359, 1710, 1140, 1101, 958, 822 cm<sup>-1</sup>.

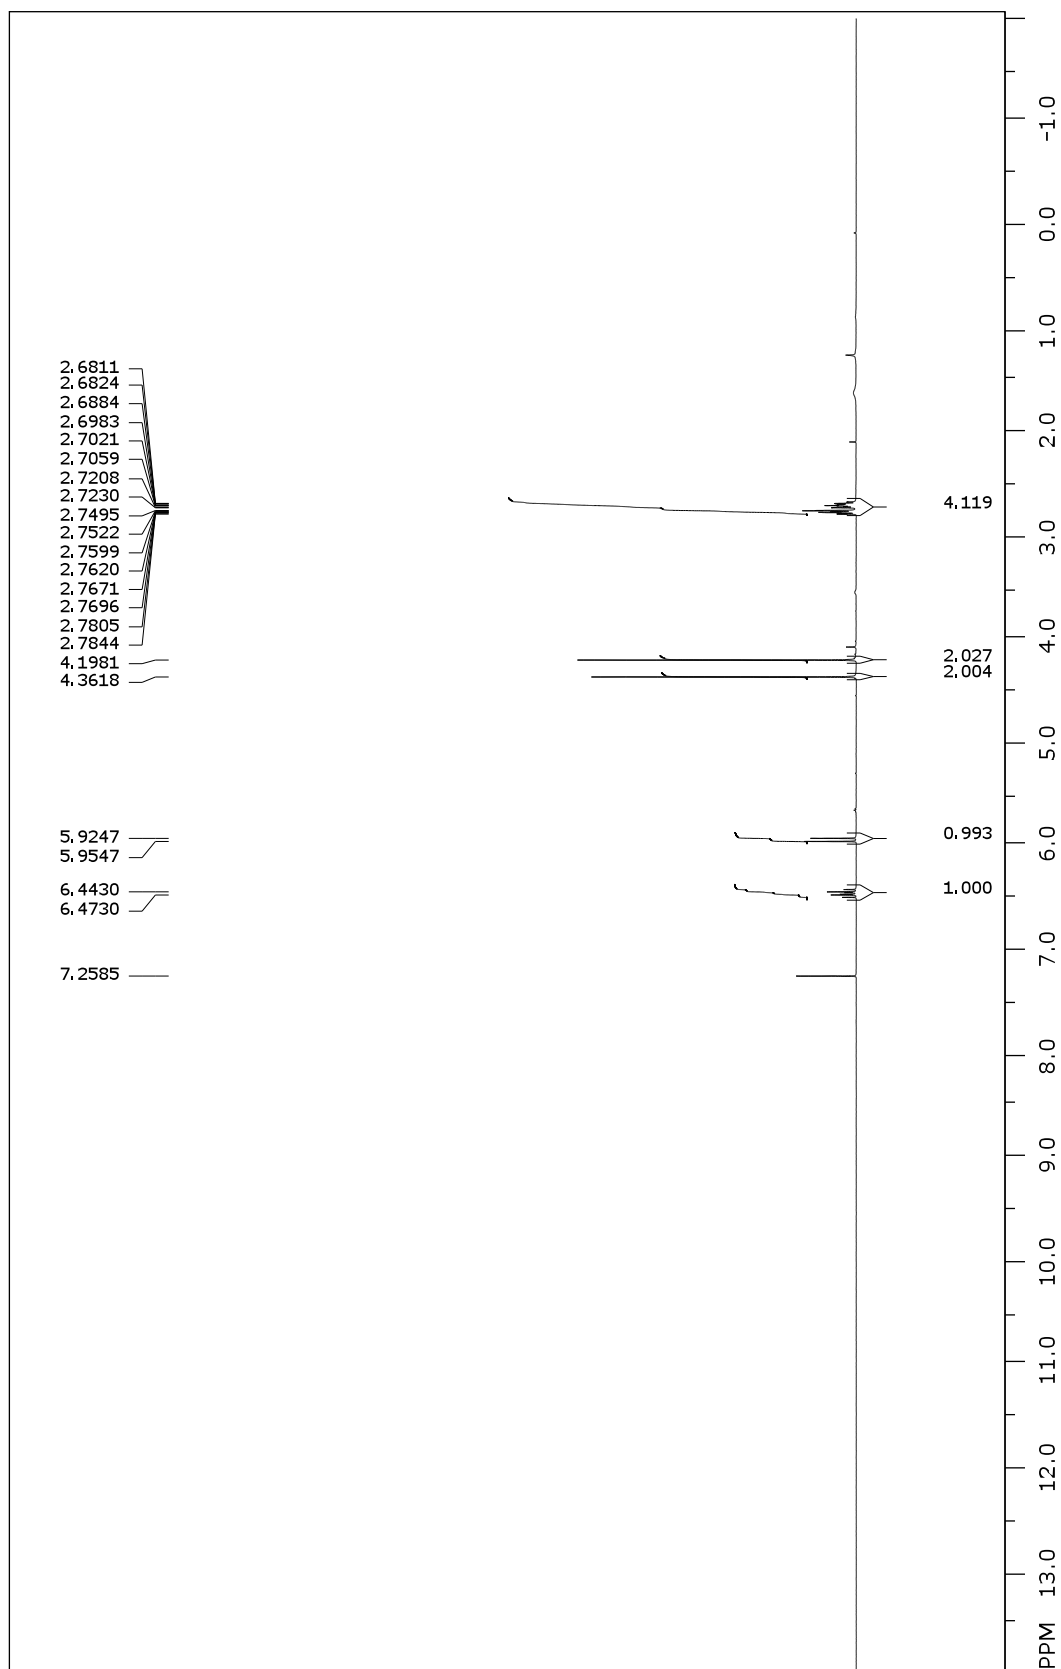

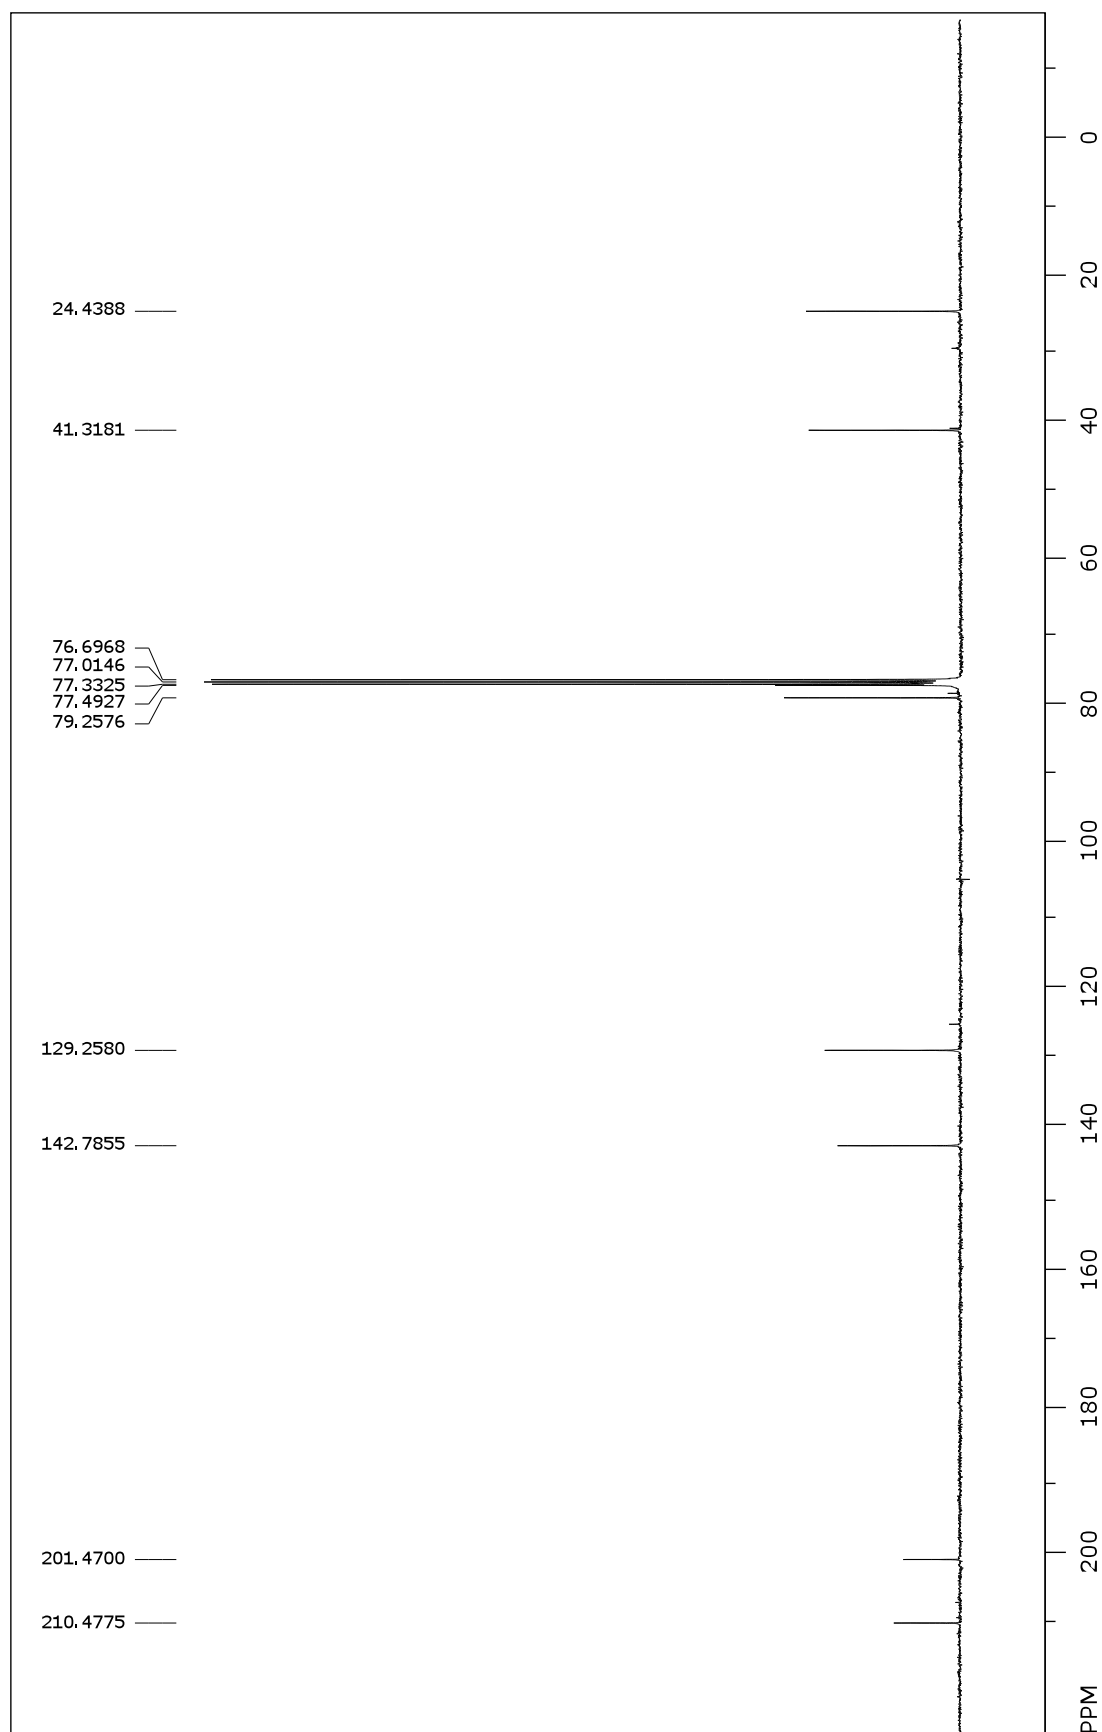



**(Z)-5-methyl-7,9-Dihydrooxonine-3,8(2H,4H)-dione (4n)**

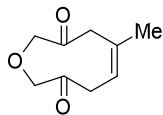

To an oven dried 2-dram vial equipped with a stir bar was added diacetoxyiodobenzene (63.8 mg, 0.198 mmol, 120 mol%) and diol **3n** (28.0 mg, 0.165 mmol, 100 mol%). The vial was purged with argon, and dichloromethane was added (1.0 mL, 0.1M). The reaction was allowed to stir at ambient temperature for 3 hours. The volatiles were removed via rotary evaporation under reduced pressure. The residue was subjected to flash column chromatography (SiO<sub>2</sub>: 1:9, ethyl acetate: hexanes) to furnish dione **4n** (25.4 mg, 0.151 mmol, 90% yield) as a colorless oil.

**TLC (SiO<sub>2</sub>):** R<sub>f</sub> = 0.44 (2:3, ethyl acetate: hexanes).

**<sup>1</sup>H NMR (400 MHz, CDCl<sub>3</sub>):** δ 5.36 (m, 1H), 4.03 (m, 4H), 3.60-3.38 (m, 4H), 1.75 (m, 3H) ppm.

**<sup>13</sup>C NMR (100 MHz, CDCl<sub>3</sub>):** δ 208.2, 207.7, 133.4, 119.8, 78.8, 78.6, 45.3, 41.9, 23.7 ppm.

**LRMS (CI<sup>+</sup>):** Calculated for C<sub>9</sub>H<sub>13</sub>O<sub>3</sub> (M+H) 169; Found 169.

**FTIR (neat):** ν 2923, 2360, 1708, 1412, 1271, 1136, 1104, 862, 763 cm<sup>-1</sup>.

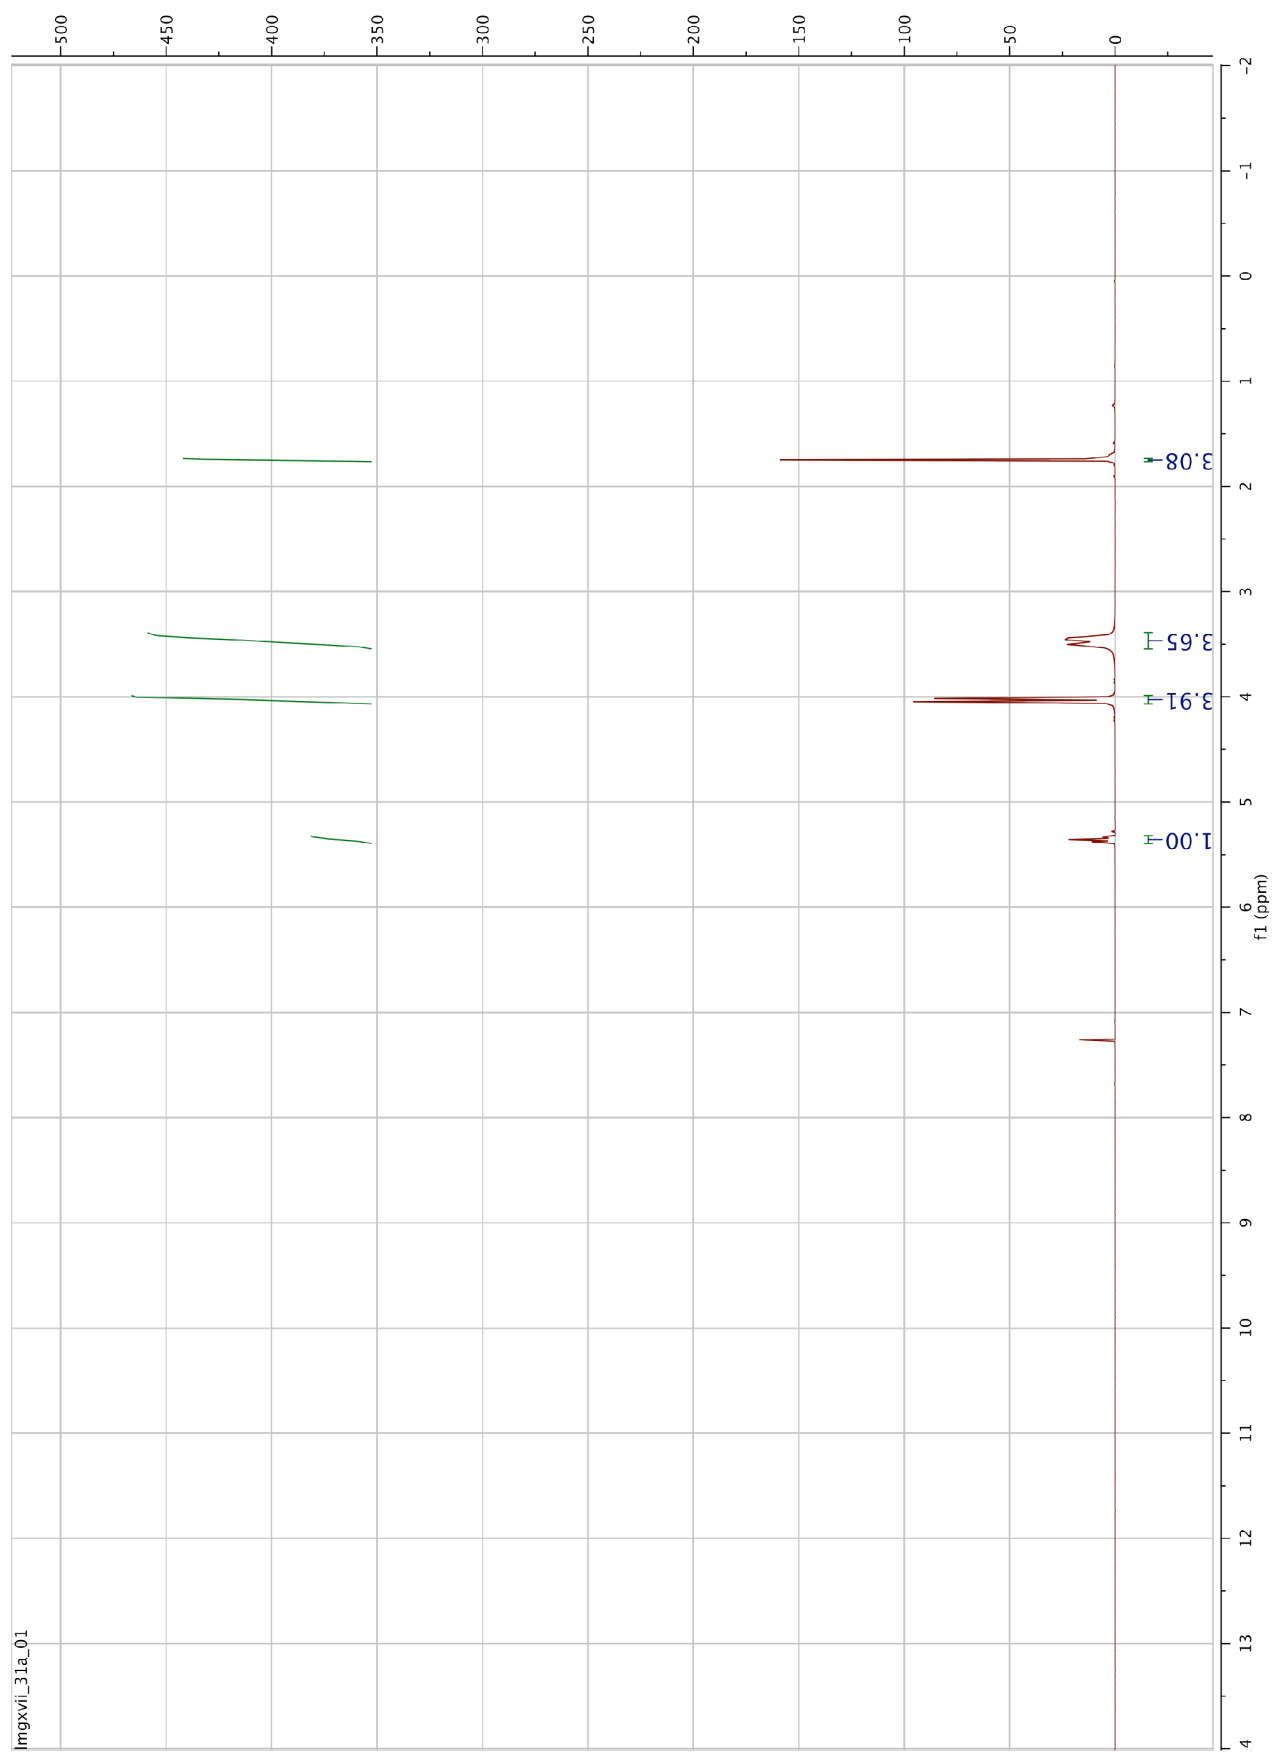

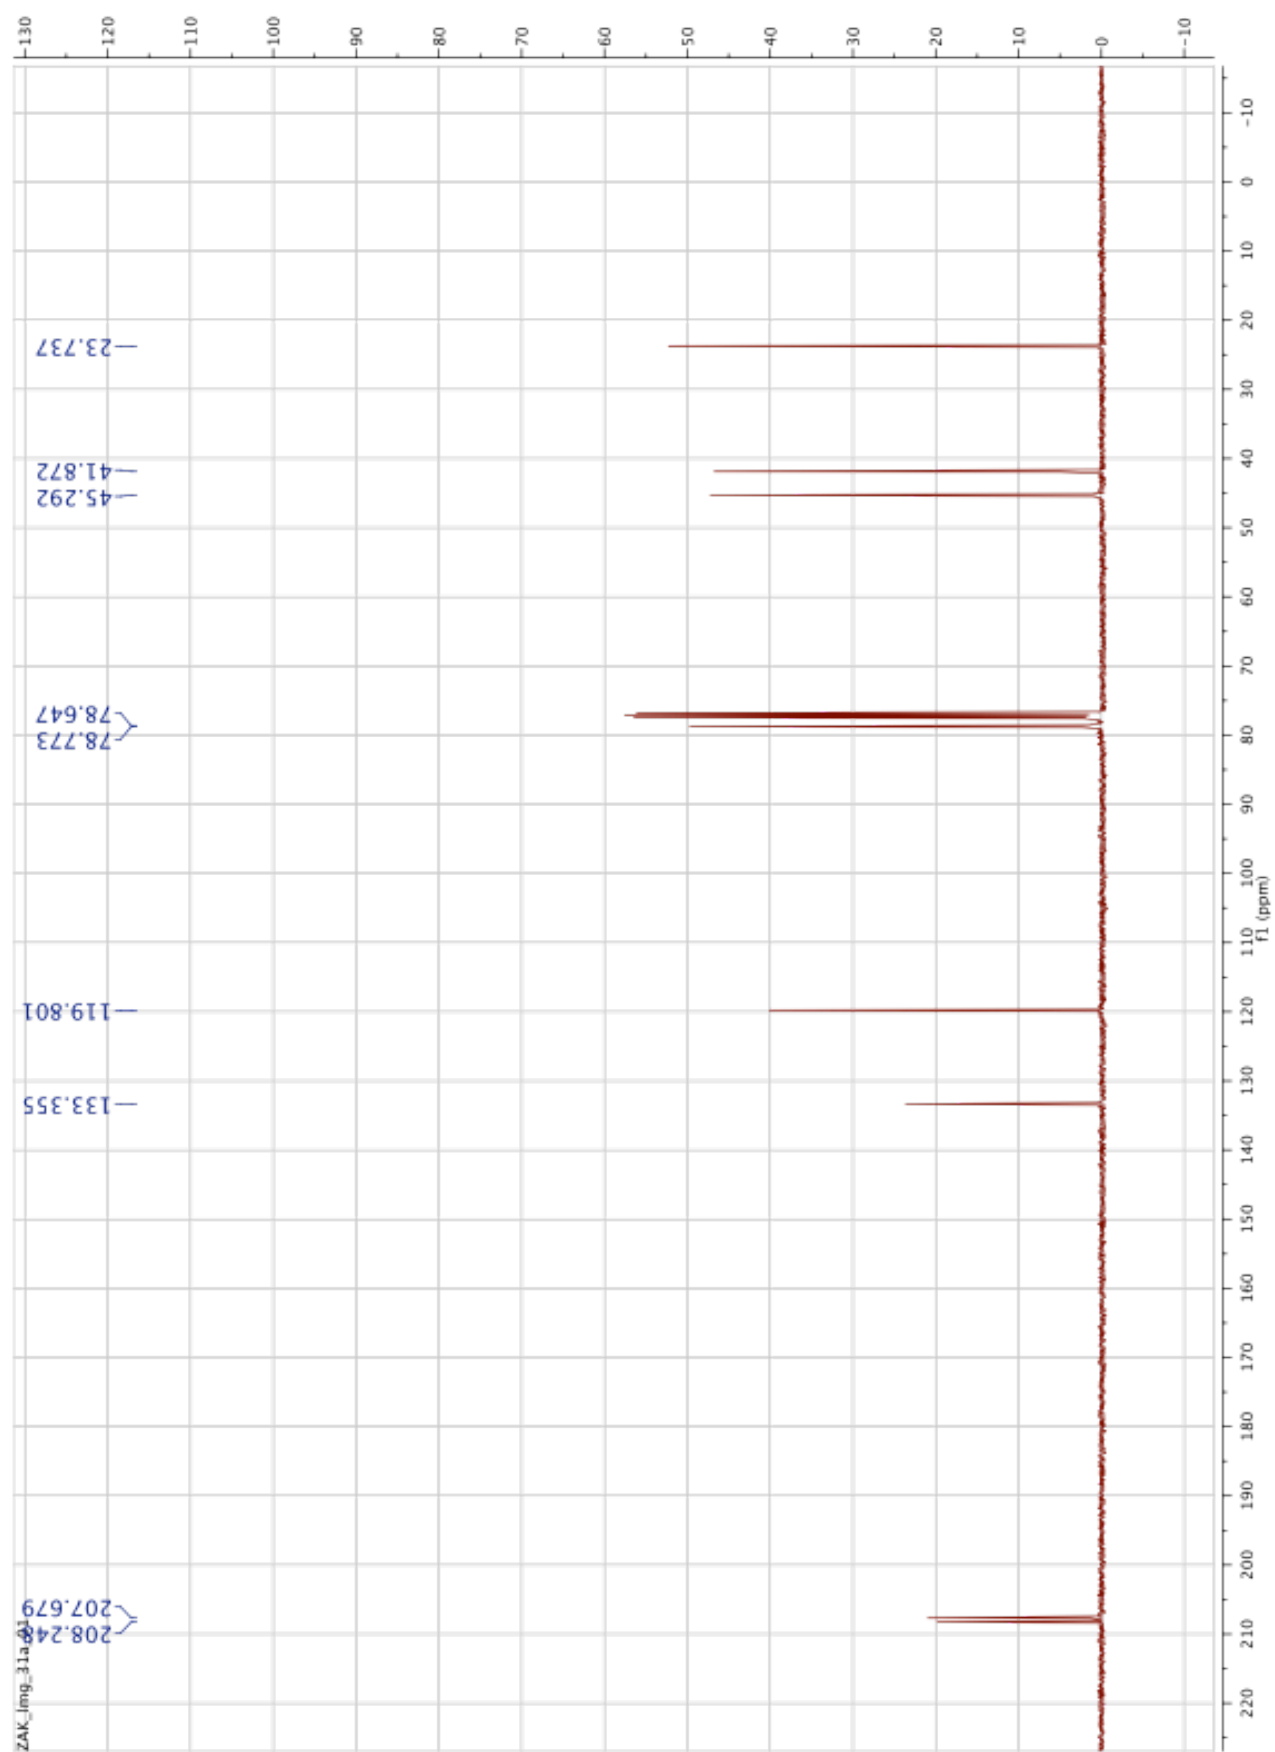

**(Z)-5-(4-methylpent-3-en-1-yl)-7,9-dihydrooxonine-3,8(2H,4H)-dione (4o)**

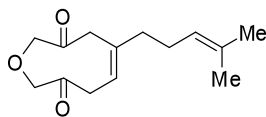

To an oven dried 2-dram vial equipped with a stir bar was added diacetoxyiodobenzene (97.3 mg, 0.300 mmol, 120 mol%) and diol **3o** (60.0 mg, 0.25 mmol, 100 mol%). The vial was purged with argon, and dichloromethane was added (1.0 mL, 0.1M). The reaction was allowed to stir at ambient temperature for 1 hours. The volatiles were removed via rotary evaporation under reduced pressure. The residue was subjected to flash column chromatography (SiO<sub>2</sub>: 1:9, ethyl acetate: hexanes) to furnish dione **4o** (43.5 mg, 0.183, 73% yield) as a colorless oil.

**TLC (SiO<sub>2</sub>):** R<sub>f</sub> = 0.55 (2:3, ethyl acetate: hexanes).

**<sup>1</sup>H NMR (400 MHz, CDCl<sub>3</sub>):** δ 5.36 (t, 1H, *J* = 8 Hz), 5.01 (m, 1H), 4.05 (s, 2H), 4.02 (s, 2H), 3.49 (m, 4H), 2.07 (m, 4H), 1.66 (s, 3H), 1.57 (s, 3H) ppm.

**<sup>13</sup>C NMR (100 MHz, CDCl<sub>3</sub>):** δ 208.2, 207.9, 137.0, 132.5, 123.0, 119.4, 78.66, 78.65, 43.8, 41.7, 36.7, 26.1, 25.7, 17.7 ppm.

**LRMS (CI<sup>+</sup>):** Calculated for C<sub>14</sub>H<sub>21</sub>O<sub>2</sub> (M+H) 237; Found 237.

**FTIR (neat):** ν 2929, 1710, 1442, 1135 cm<sup>-1</sup>.

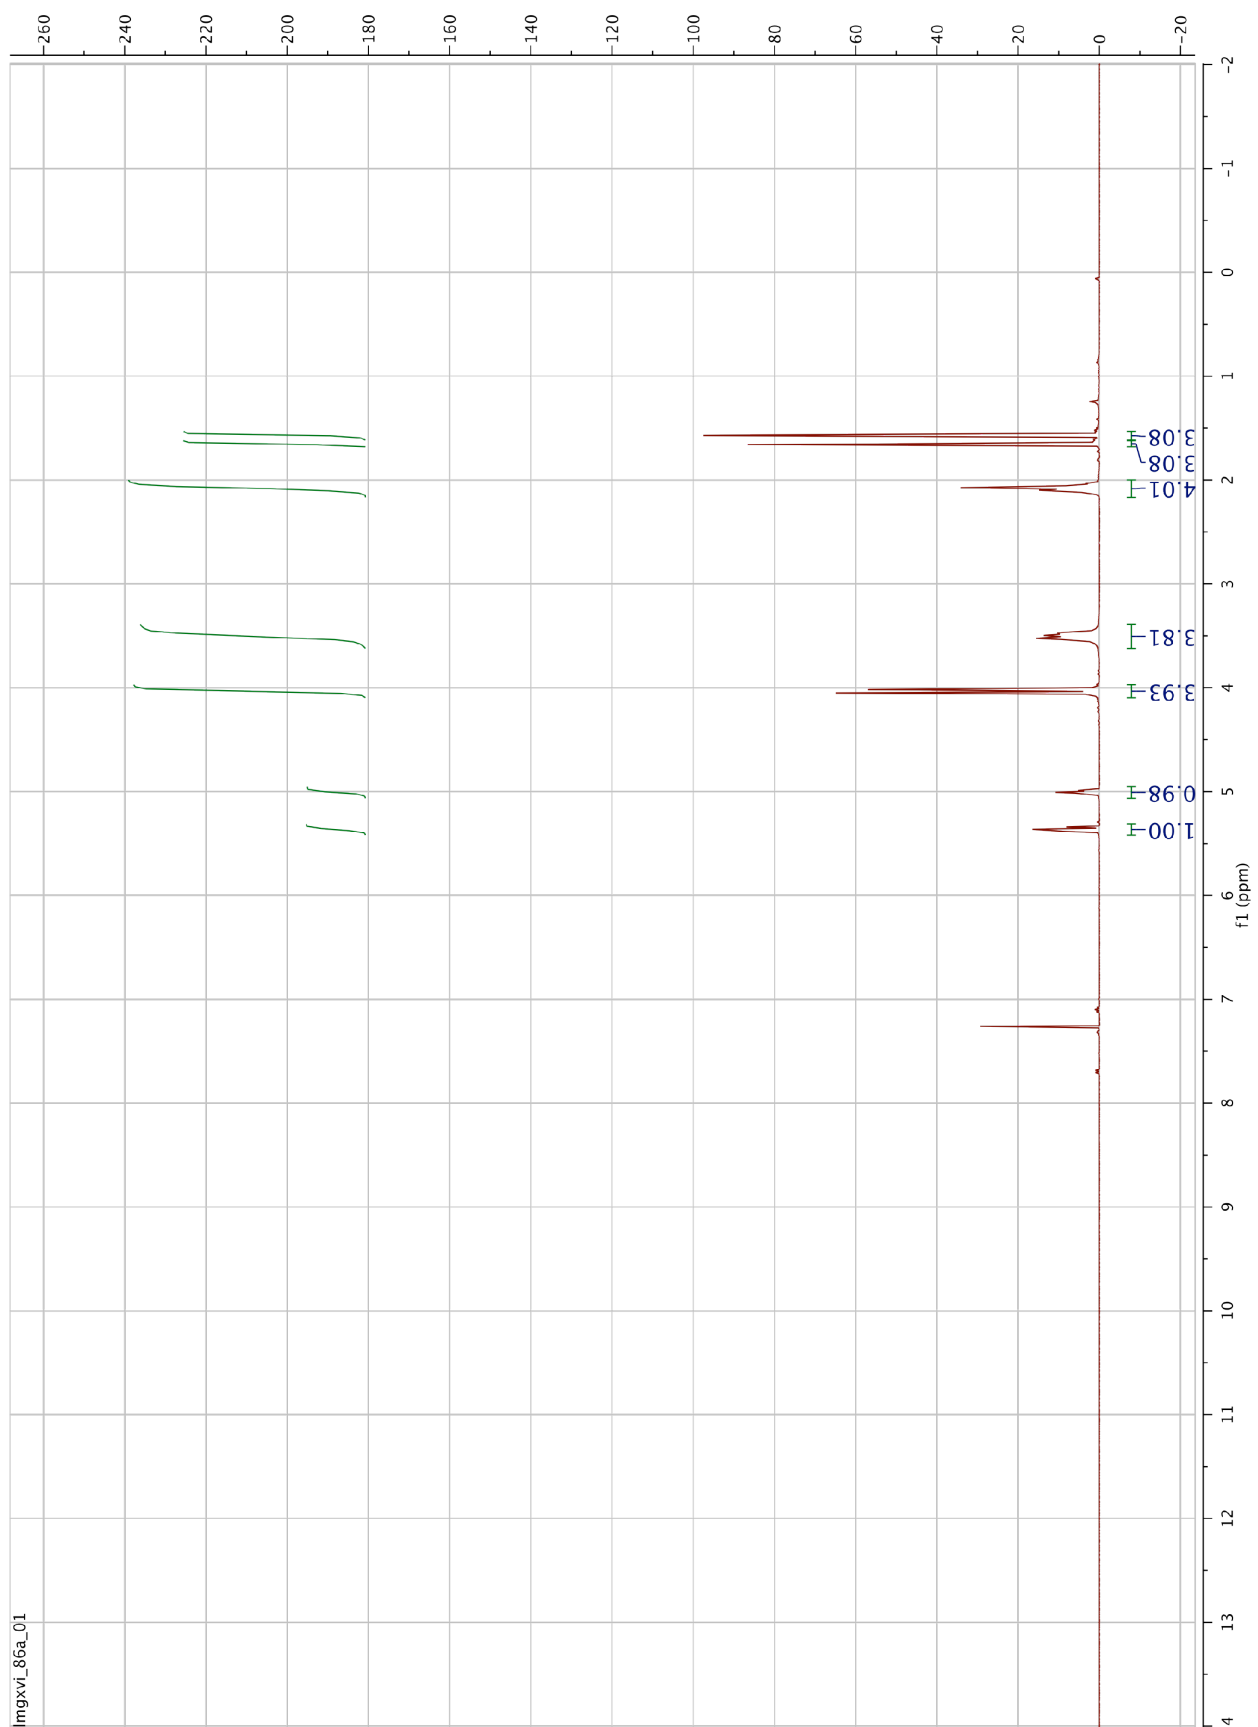

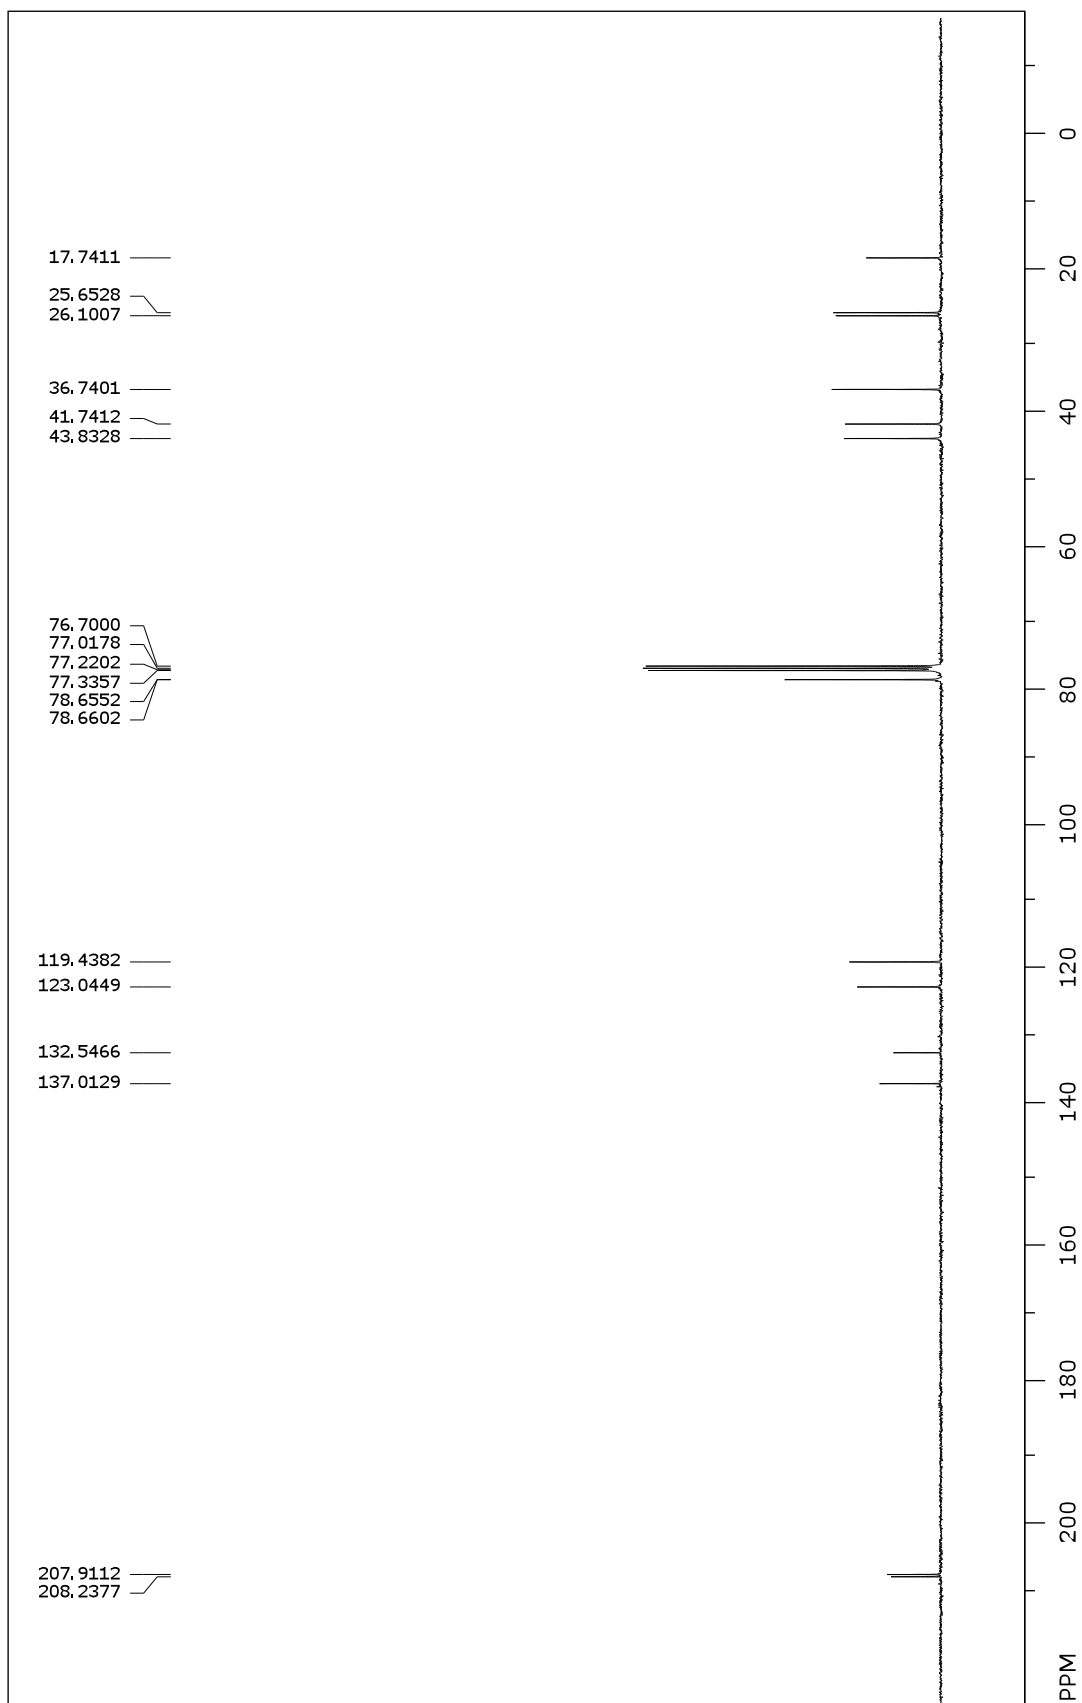

**(*R,Z*)-2-(((*tert*-butyldimethylsilyl)oxy)methyl)-9,10-dihydro-2*H*-oxecine-3,8(4*H*,7*H*)-dione (4p)**

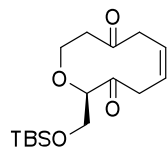

To an oven dried 2-dram vial equipped with a stir bar was added diacetoxyiodobenzene (52.2 mg, 0.162 mmol, 120 mol%) and diol **3p** (42.7 mg, 0.135 mmol, 100 mol%, 1:1 dr). The vial was purged with argon, and dichloromethane was added (1.0 mL, 0.1M). The reaction was allowed to stir at ambient temperature for 4 hours. The volatiles were removed via rotary evaporation under reduced pressure. The residue was subjected to flash column chromatography (SiO<sub>2</sub>: 3:17, ethyl acetate: hexanes) to furnish dione **4p** (38.6 mg, 0.123 mmol, 90% yield) as a colorless oil.

**TLC (SiO<sub>2</sub>):** R<sub>f</sub> = 0.42 (1:3, ethyl acetate: hexanes).

**<sup>1</sup>H NMR (400 MHz, CDCl<sub>3</sub>):** δ 5.69 (m, 1H), 5.50 (ddt, 1H, *J* = 1.5, 5.8, 10.6 Hz), 4.12-3.99 (m, 3H), 3.95 (dd, 1H, *J* = 3, 11 Hz), 3.84 (dd, 1H, *J* = 5.6, 11 Hz), 3.73 (dd, 1H, *J* = 3, 6 Hz), 3.68 (dt, 1H, *J* = 2, 10.5 Hz), 2.87 (m, 1H), 2.79-2.70 (m, 2H), 2.56 (ddd, 1H, *J* = 2.2, 5.4, 14 Hz), 0.88 (s, 9H), 0.07 (s, 3H), 0.05 (s, 3H) ppm.

**<sup>13</sup>C NMR (100 MHz, CDCl<sub>3</sub>):** δ 208.6, 127.2, 123.9, 86.1, 68.7, 64.3, 44.7, 43.2, 41.1, 25.8, 18.2, -5.45, -5.50 ppm.

**LRMS (CI<sup>+</sup>):** Calculated for C<sub>16</sub>H<sub>29</sub>O<sub>4</sub>Si (M+H) 313; Found 313.

**FTIR (neat):** ν 2927, 2855, 1708, 1254, 1101, 883, 777 cm<sup>-1</sup>.

**[α]<sub>D</sub><sup>28</sup>** +145 (c = 1.78, CH<sub>2</sub>Cl<sub>2</sub>).

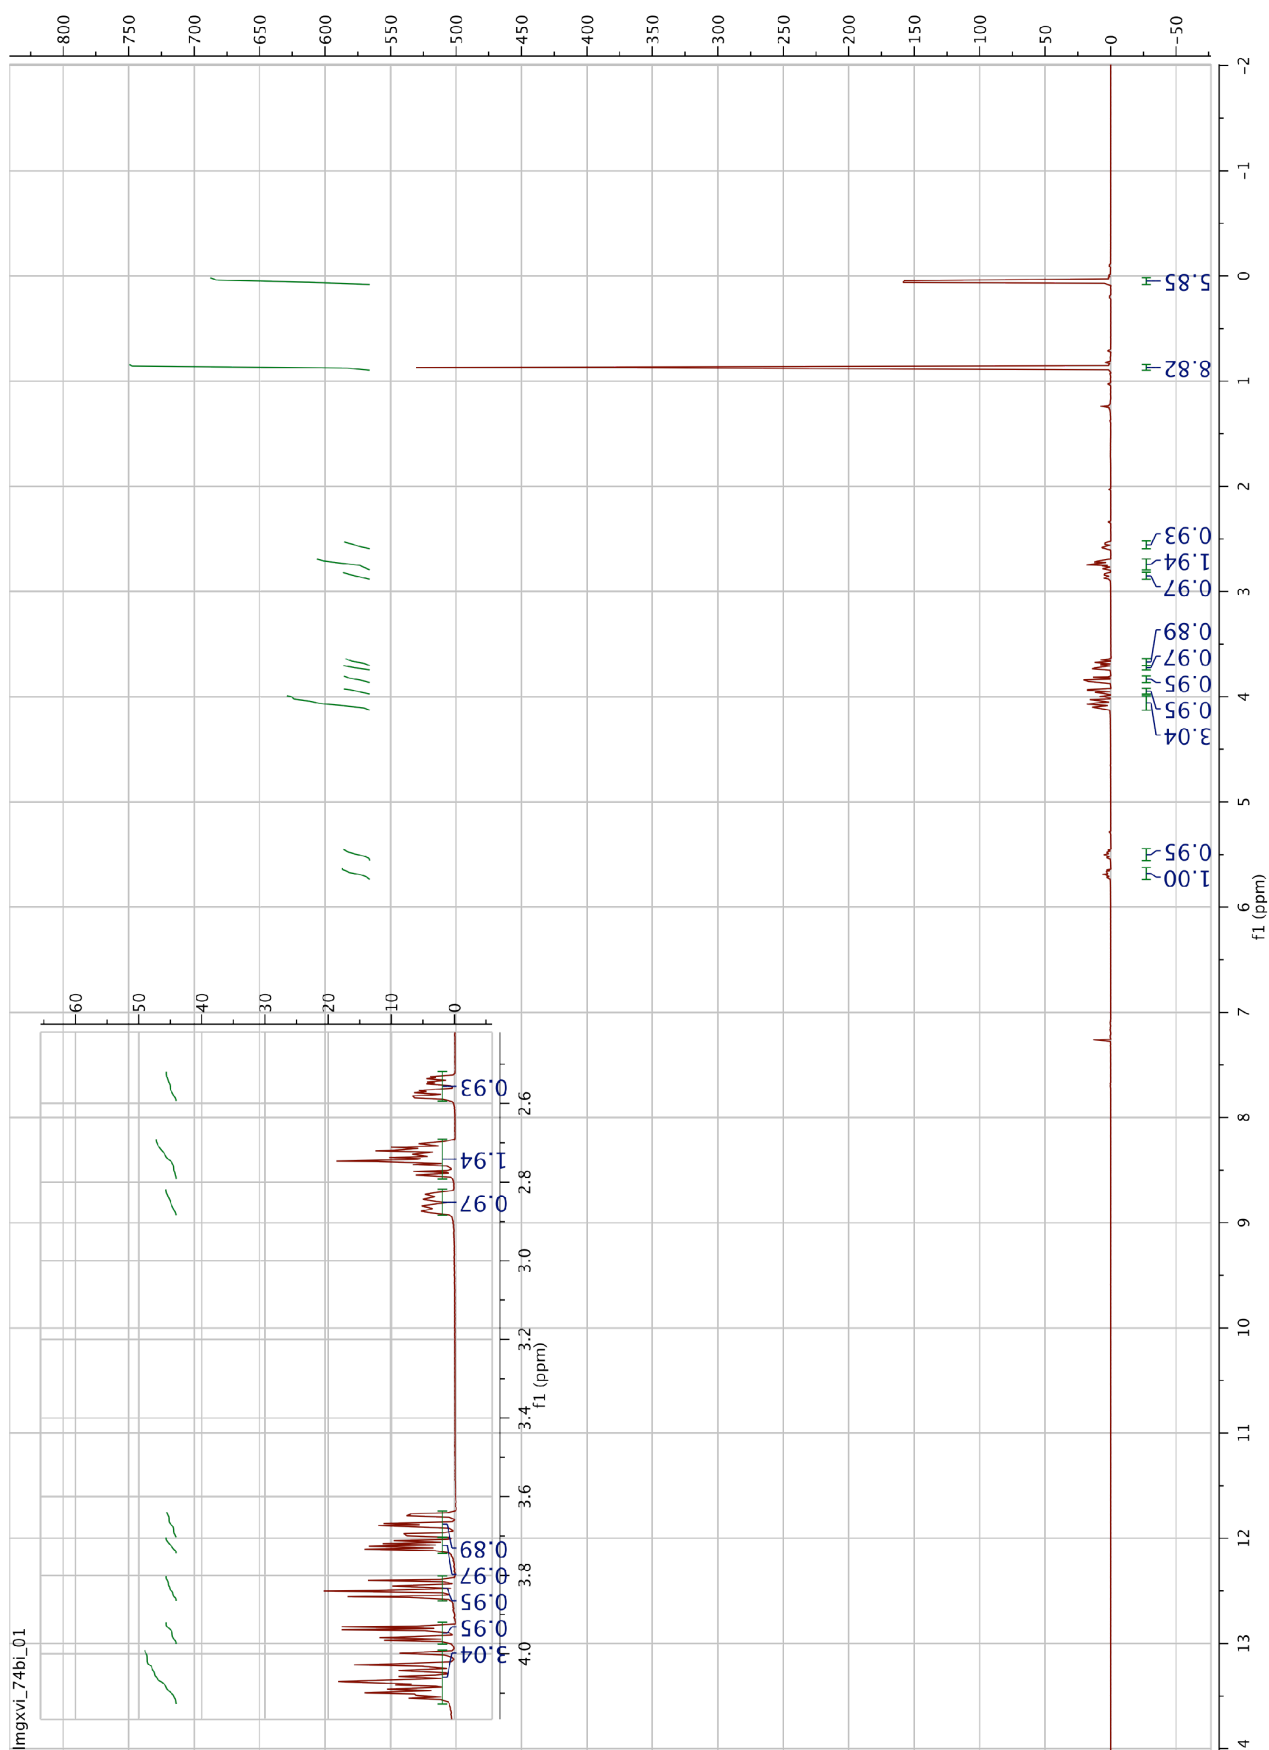



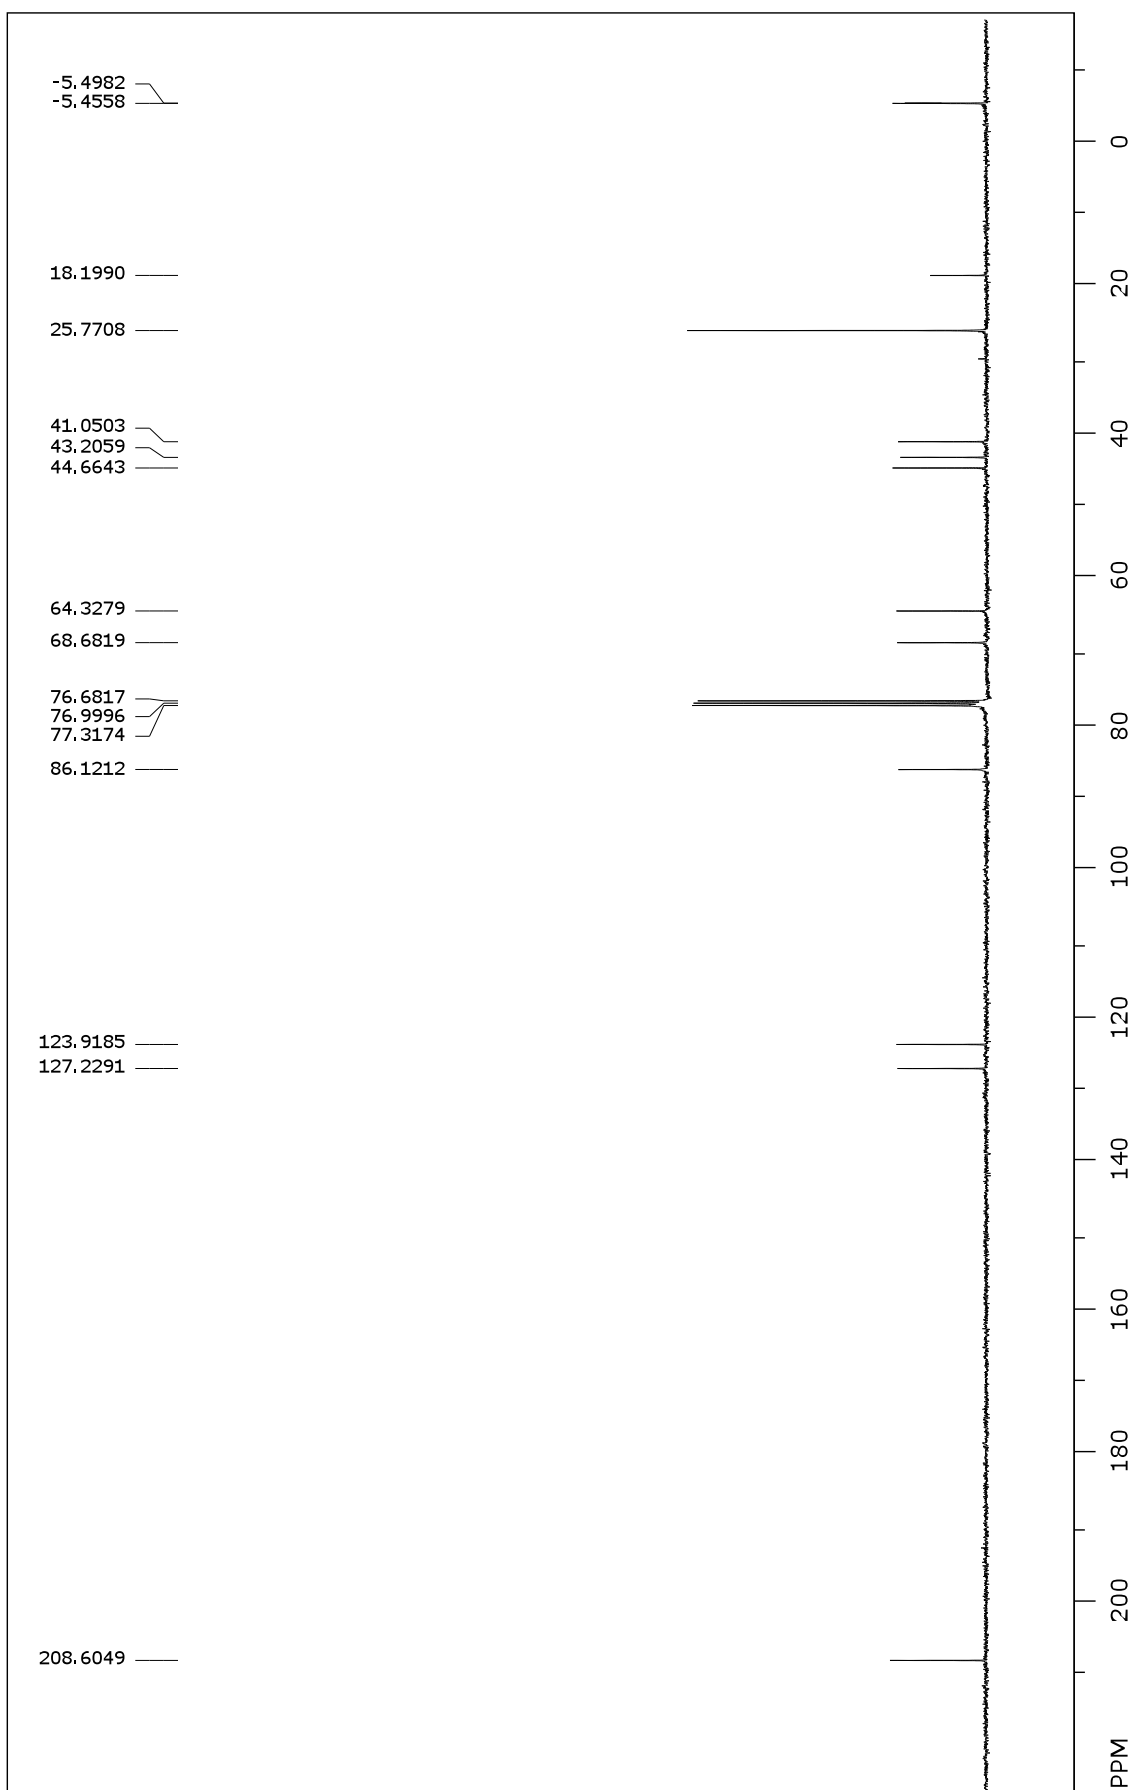

**(4a*R*,6*S*,12a*R*,*Z*)-6-Methoxy-2,2-dimethyl-4,4a,11,12a-tetrahydro[1,3]dioxino[5,4-*b*] oxecine-7,12(6*H*,8*H*)-dione (4q)**

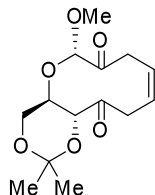

To an oven dried 2-dram vial equipped with a stir bar was added diacetoxyiodobenzene (49.0 mg, 0.152 mmol, 120 mol%) and diol **3q** (29.0 mg, 0.101 mmol, 100 mol%, 3.2:1 dr). The vial was purged with argon, and dichloromethane was added (1.0 mL, 0.1M). The reaction was allowed to stir at ambient temperature for 5 hours. The volatiles were removed via rotary evaporation under reduced pressure. The residue was subjected to flash column chromatography (SiO<sub>2</sub>: 2:3, ethyl acetate: hexanes) to furnish dione **4q** (22.1 mg, 0.077 mmol, 77% yield) as a colorless oil.

**TLC (SiO<sub>2</sub>):** R<sub>f</sub> = 0.25 (2:3, ethyl acetate: hexanes).

**<sup>1</sup>H NMR (400 MHz, CDCl<sub>3</sub>):** δ 5.79-5.63 (m, 2H), 4.89 (s, 1H), 4.48 (d, 1H, *J* = 9 Hz), 3.99-3.93 (m, 1H), 3.92-3.84 (m, 2H), 3.65-3.50 (m, 2H), 3.47 (s, 3H), 3.15 (m, 1H), 3.04 (m, 1H), 1.45 (s, 3H), 1.42 (s, 3H) ppm.

**<sup>13</sup>C NMR (100 MHz, CDCl<sub>3</sub>):** δ 203.1, 201.7, 126.5, 124.1, 100.9, 100.5, 76.5, 70.5, 62.5, 56.5, 40.0, 38.4, 26.4, 21.0 ppm.

**LRMS (CI<sup>+</sup>):** Calculated for C<sub>14</sub>H<sub>20</sub>NaO<sub>6</sub> (M+Na) 307; Found 307.

**FTIR (neat):** ν 2939, 1724, 1377, 1190, 1079, 859, 734 cm<sup>-1</sup>.

**[α]<sub>D</sub><sup>27</sup>** -28 (*c* = 0.74, CH<sub>2</sub>Cl<sub>2</sub>).

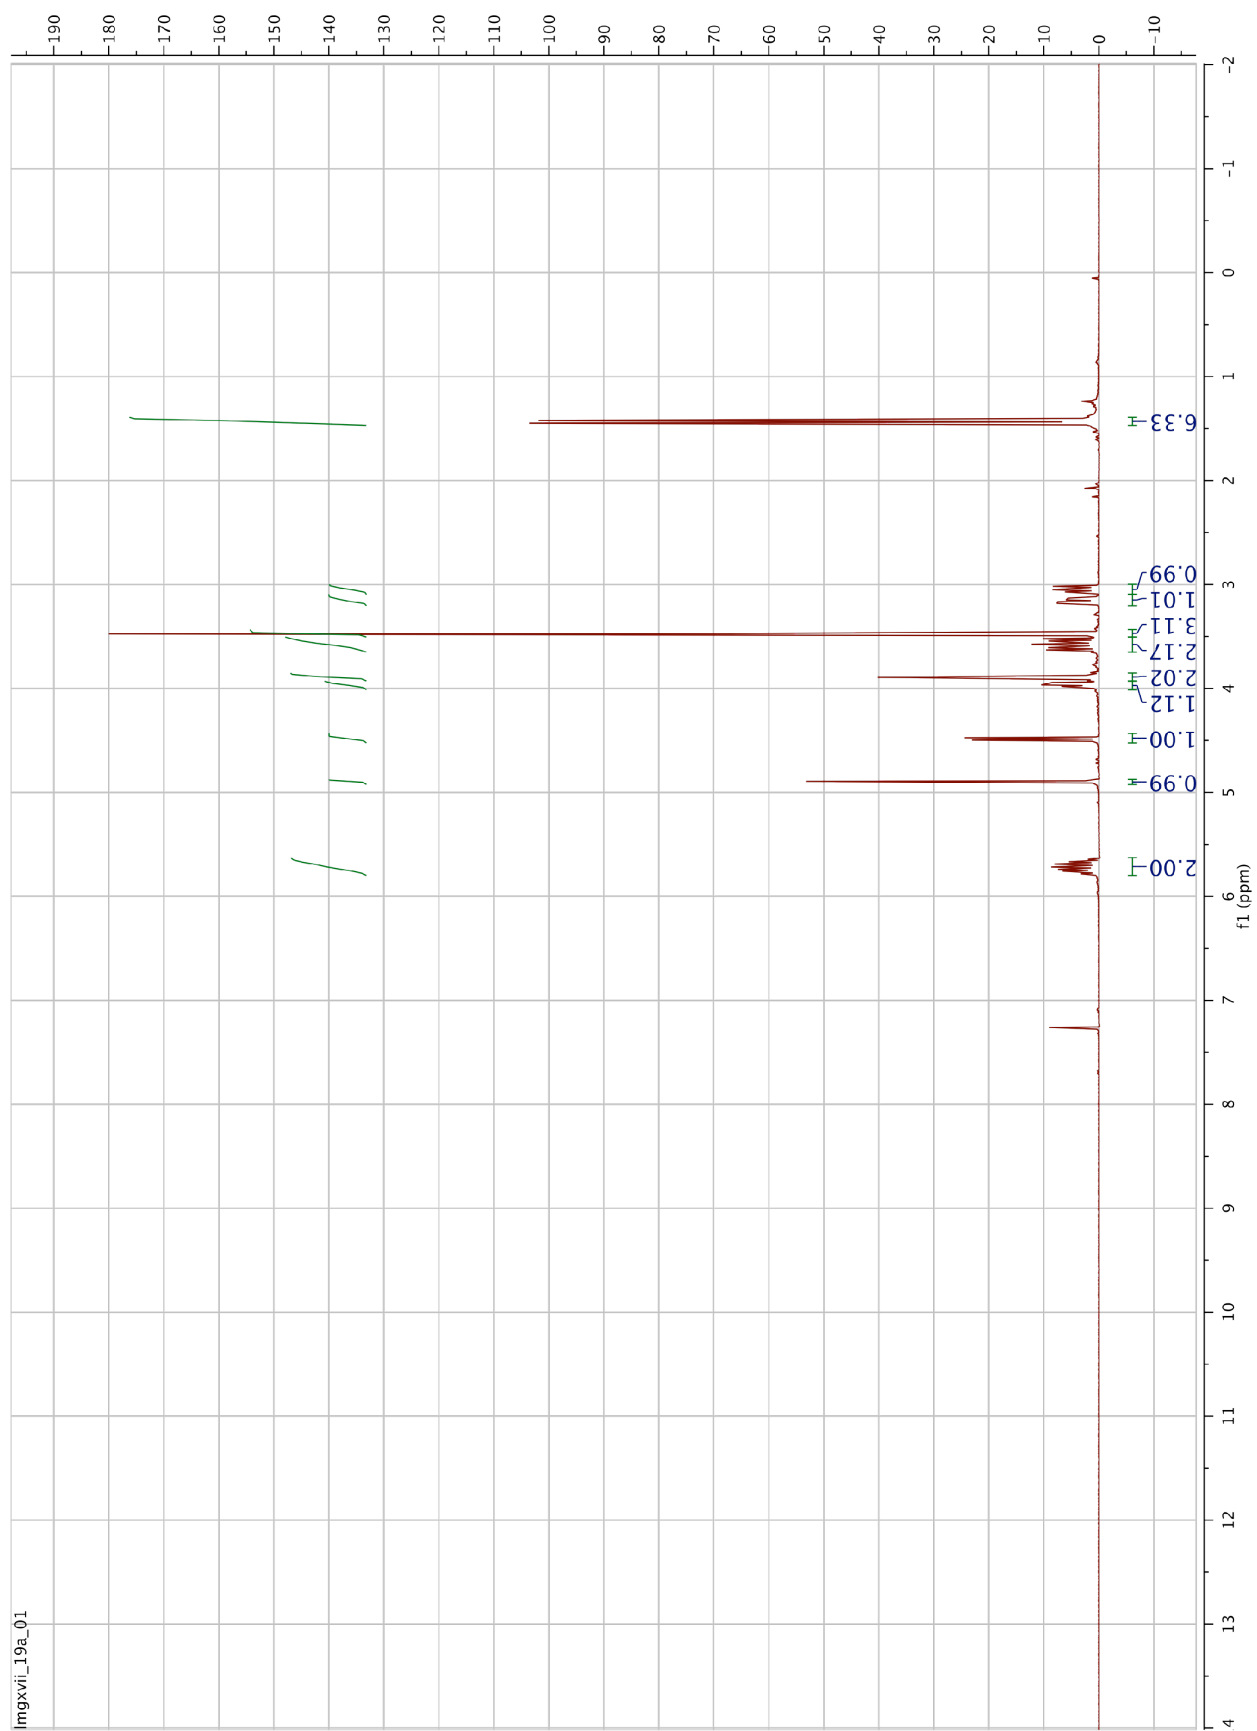

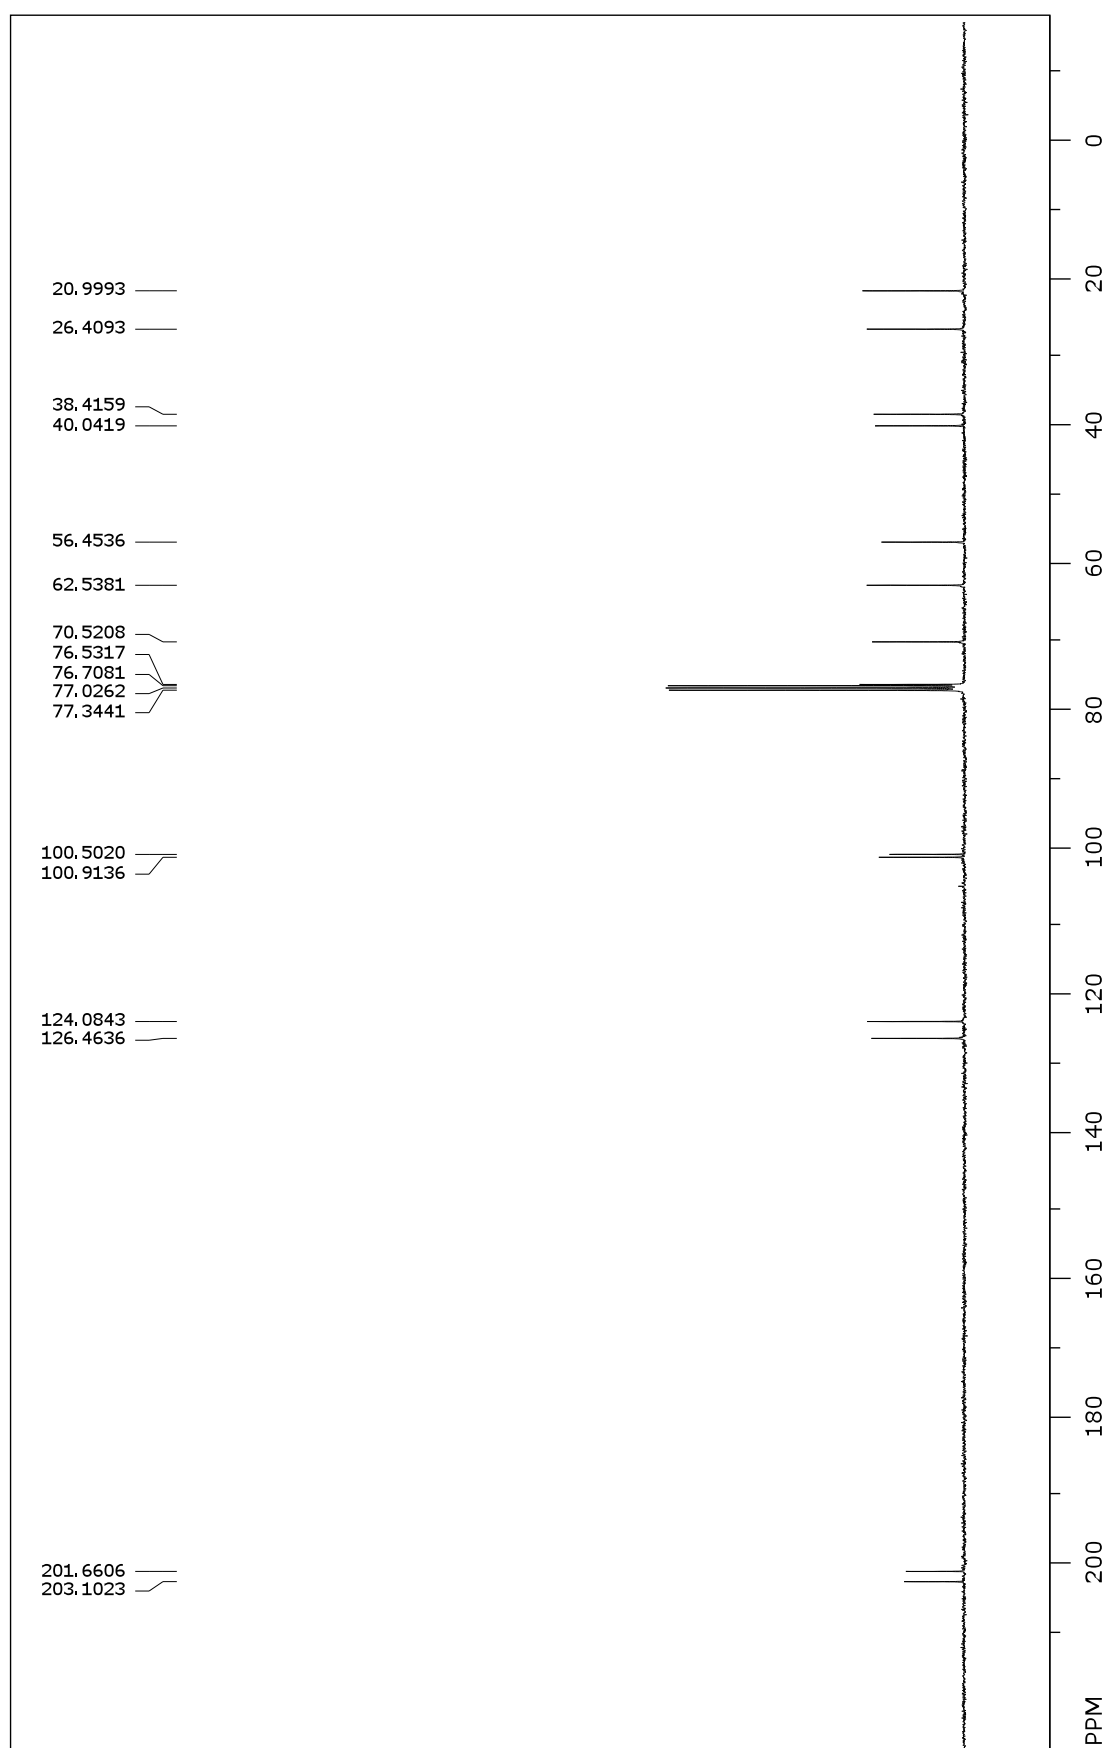

**(4a*S*\*,11*R*\*,12a*R*\*,*Z*)-11,12a-dihydroxy-1,7,10,11,12,12a-hexahydro-4*H*-4a,11-epoxybenzo[10]annulen-6(5*H*)-one (4r)**

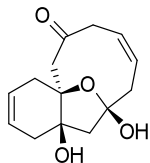

To an oven dried 2-dram vial equipped with a stir bar was added diacetoxiodobenzene (15.3 mg, 0.0476 mmol, 120 mol%) and diol **3r** (10.1 mg, 0.040 mmol, 100 mol%). The vial was purged with argon, and dichloromethane was added (0.4 mL, 0.1M). The reaction was allowed to stir at ambient temperature for 3 hours. The volatiles were removed via rotary evaporation under reduced pressure. The crude products were subjected to flash column chromatography (SiO<sub>2</sub>: 2:3- 3:2, ethyl acetate: hexanes) to furnish compound **4r** (10.0 mg, 0.040 mmol, 99% yield) as a colorless solid.

**TLC (SiO<sub>2</sub>):** R<sub>f</sub> = 0.34 (2:3, ethyl acetate: hexanes)

**<sup>1</sup>H NMR (400 MHz, CDCl<sub>3</sub>):** δ 5.96-5.84 (m, 2H), 5.80-5.77 (m, 1H), 5.64-5.61 (m, 1H), 4.39-4.35 (m, 1H, OH), 3.63 (dd, *J* = 16.4, 10.0 Hz, 1H), 2.91-2.84 (m, 3H), 2.80-2.75 (m, 1H, OH) 2.66-2.57 (m, 1H) 2.52-2.39 (m, 3H), 2.32 (d, *J* = 13.6 Hz, 1H), 2.21-2.13 (m, 1H), 2.07-2.02 (m, 1H), 1.91 (d, *J* = 10.4 Hz, 1H) ppm.

**<sup>13</sup>C NMR (100 MHz, CDCl<sub>3</sub>):** δ 210.1, 130.1, 128.5, 127.4, 124.2, 108.2, 83.4, 80.6, 46.0, 45.5, 42.0, 35.6, 34.4, 32.3 ppm.

**MP:** 121-124 °C.

**LRMS (+ESI):** Calculated for C<sub>14</sub>H<sub>18</sub>NaO<sub>4</sub> (M+Na) 273.1; Found 273.1.

**FTIR (neat):** ν 3395, 2921, 2519, 1698, 1440, 1263, 1061, 958, 802, 667 cm<sup>-1</sup>.

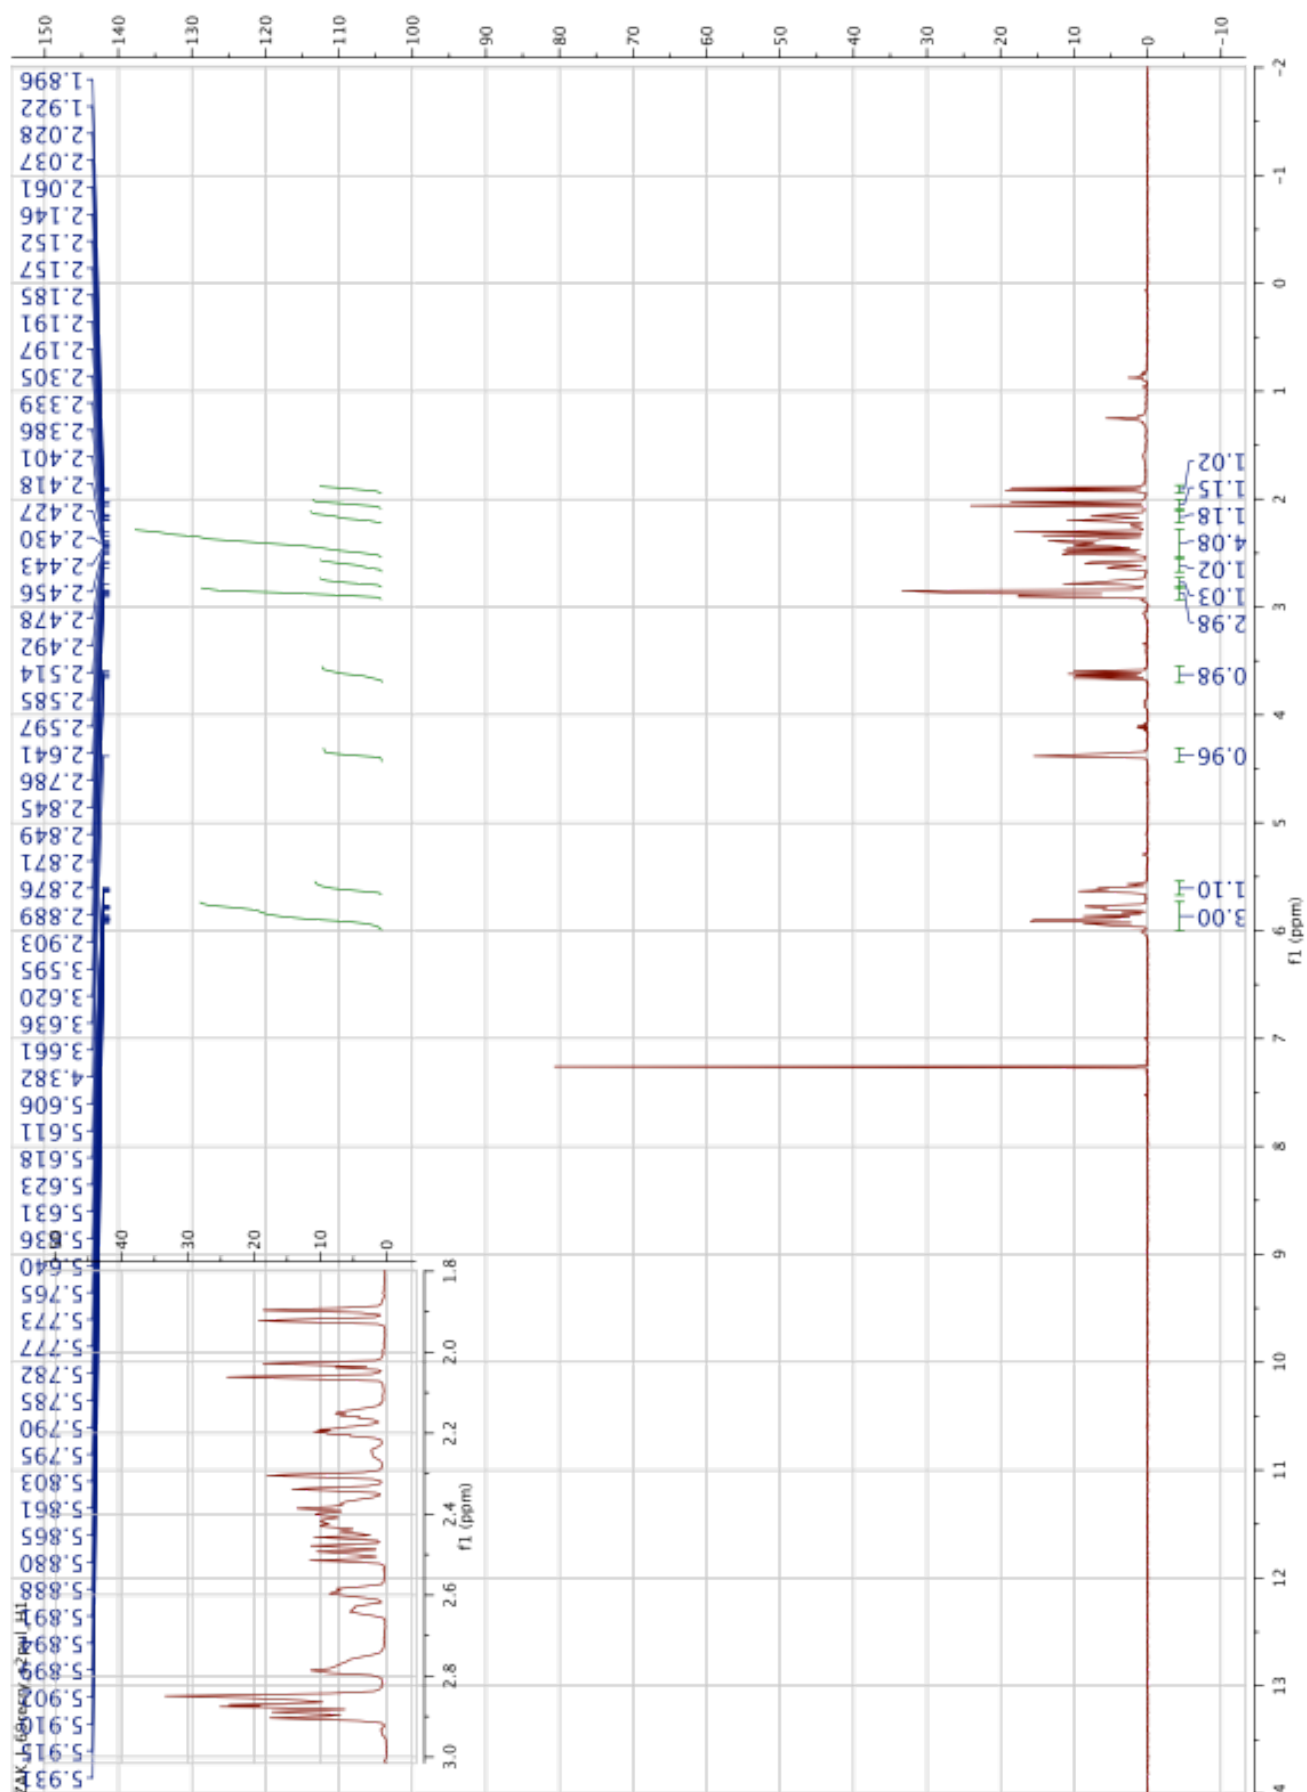

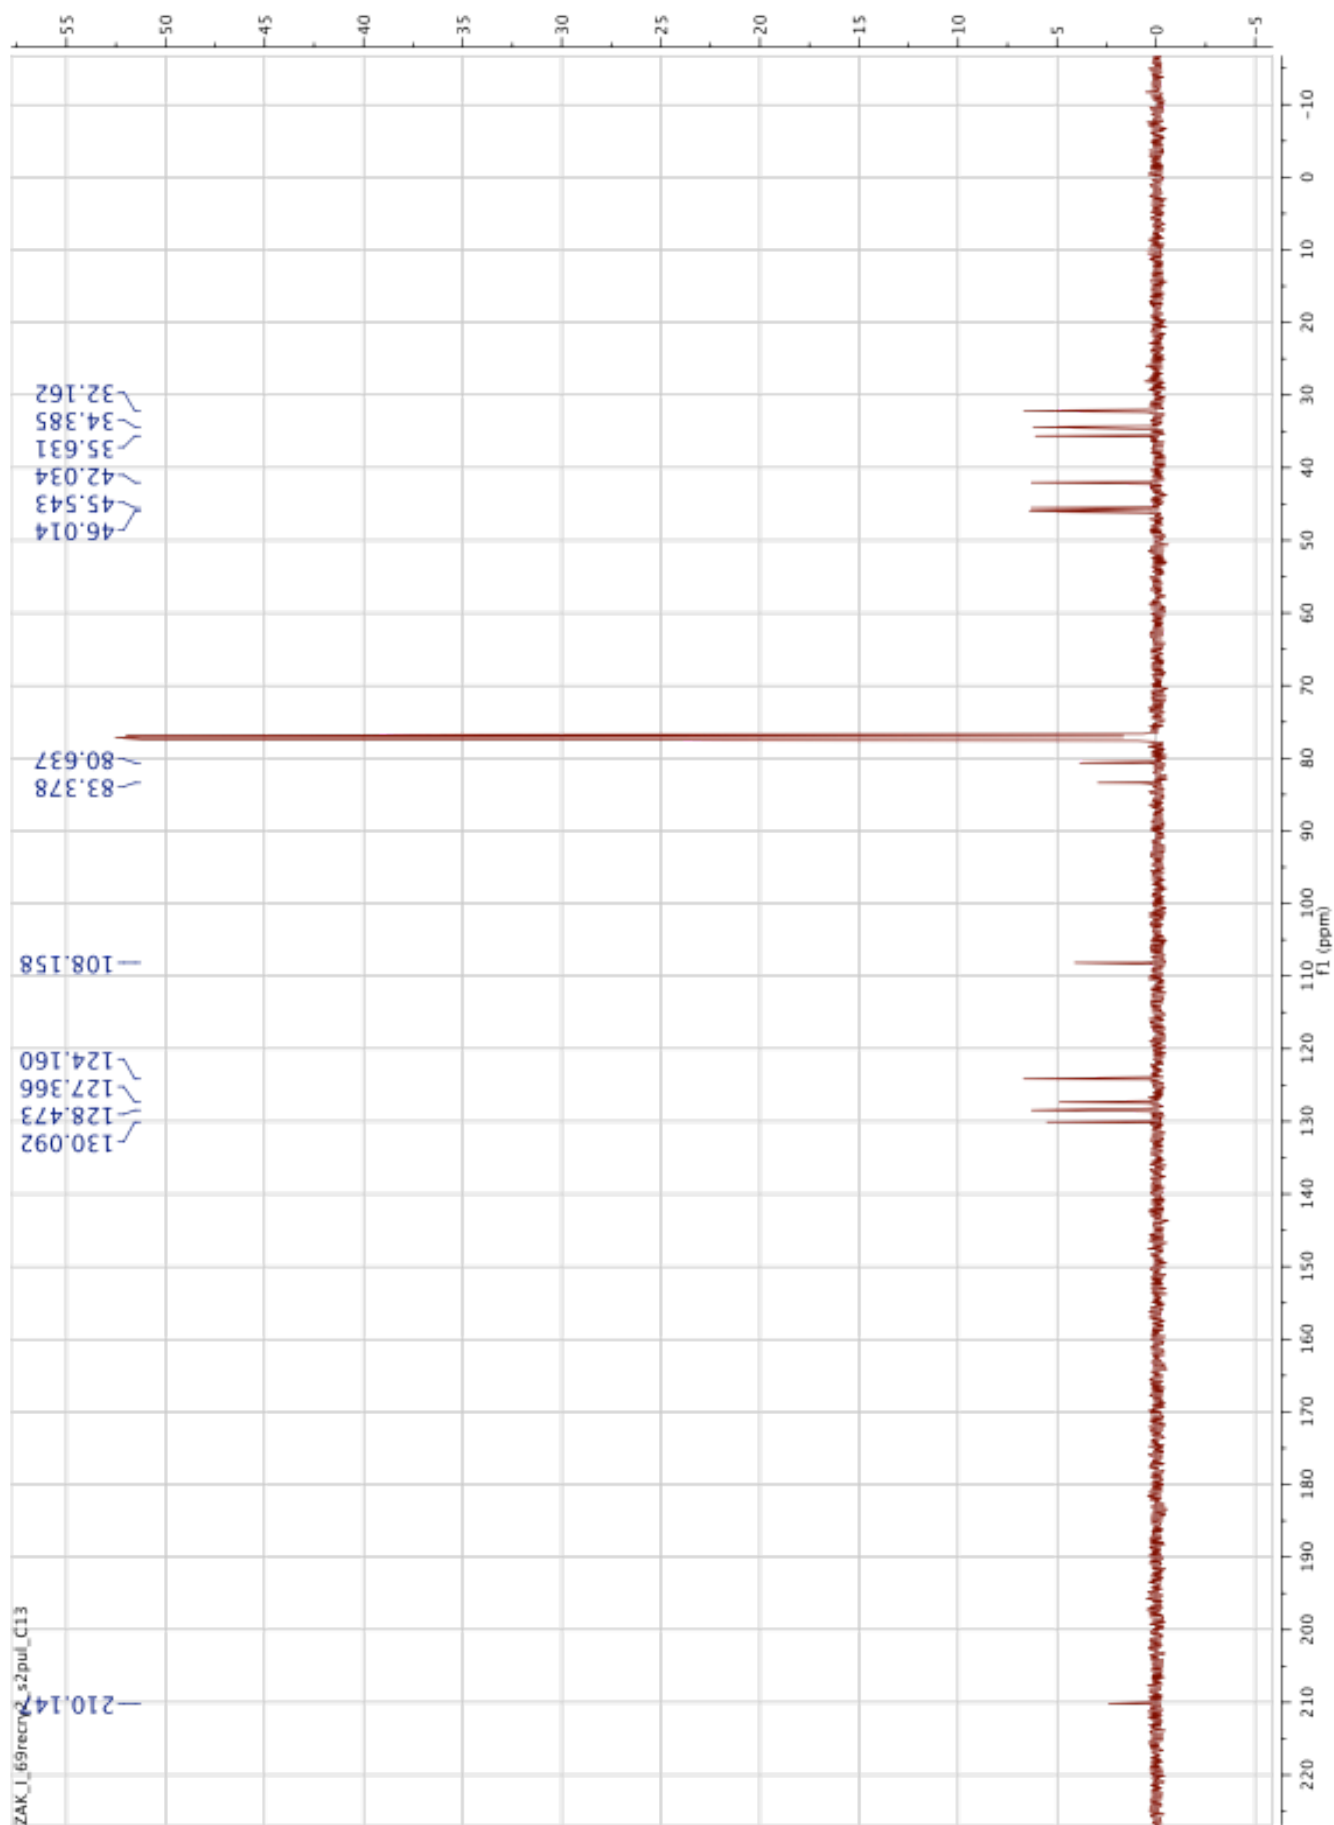

gCOSY spectrum of **4r-d<sub>2</sub>**

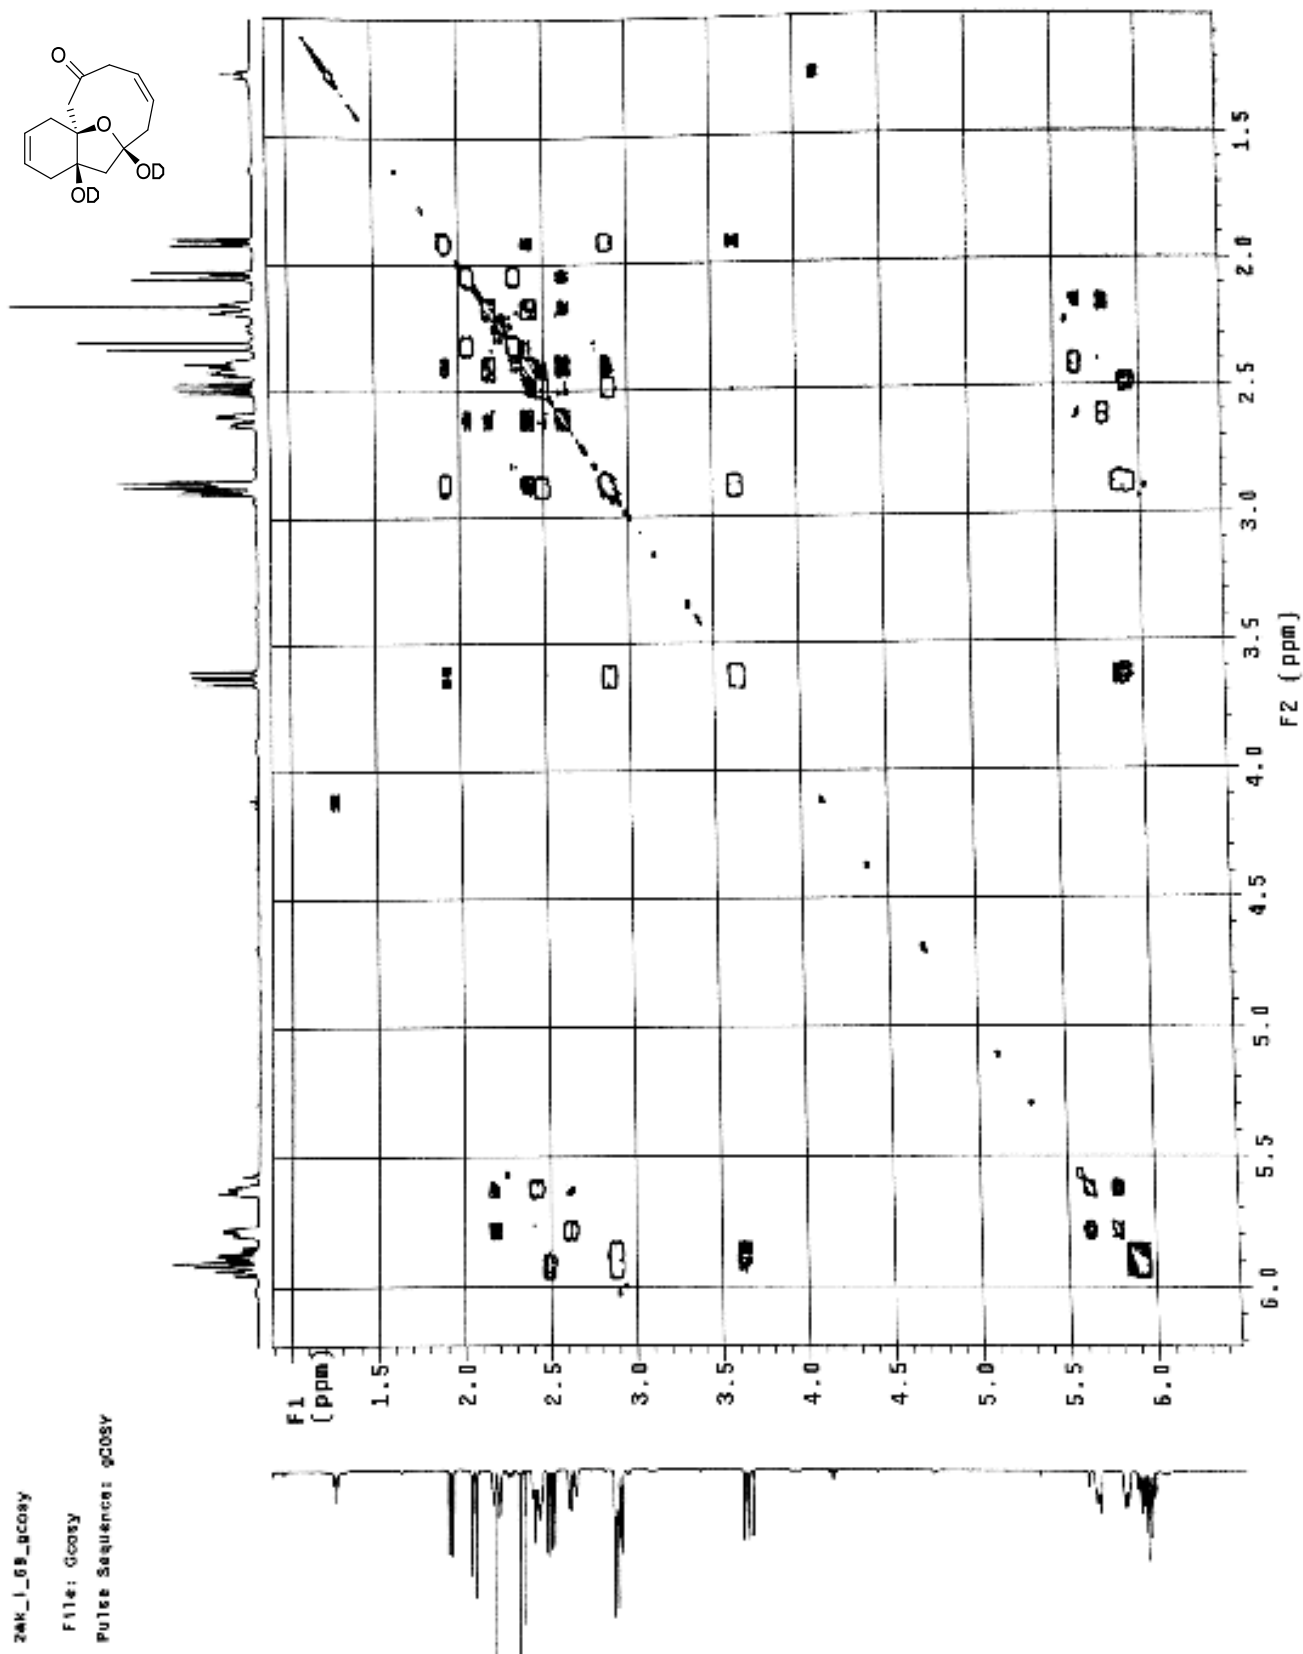



gHMQC spectrum of  $4r-d_2$

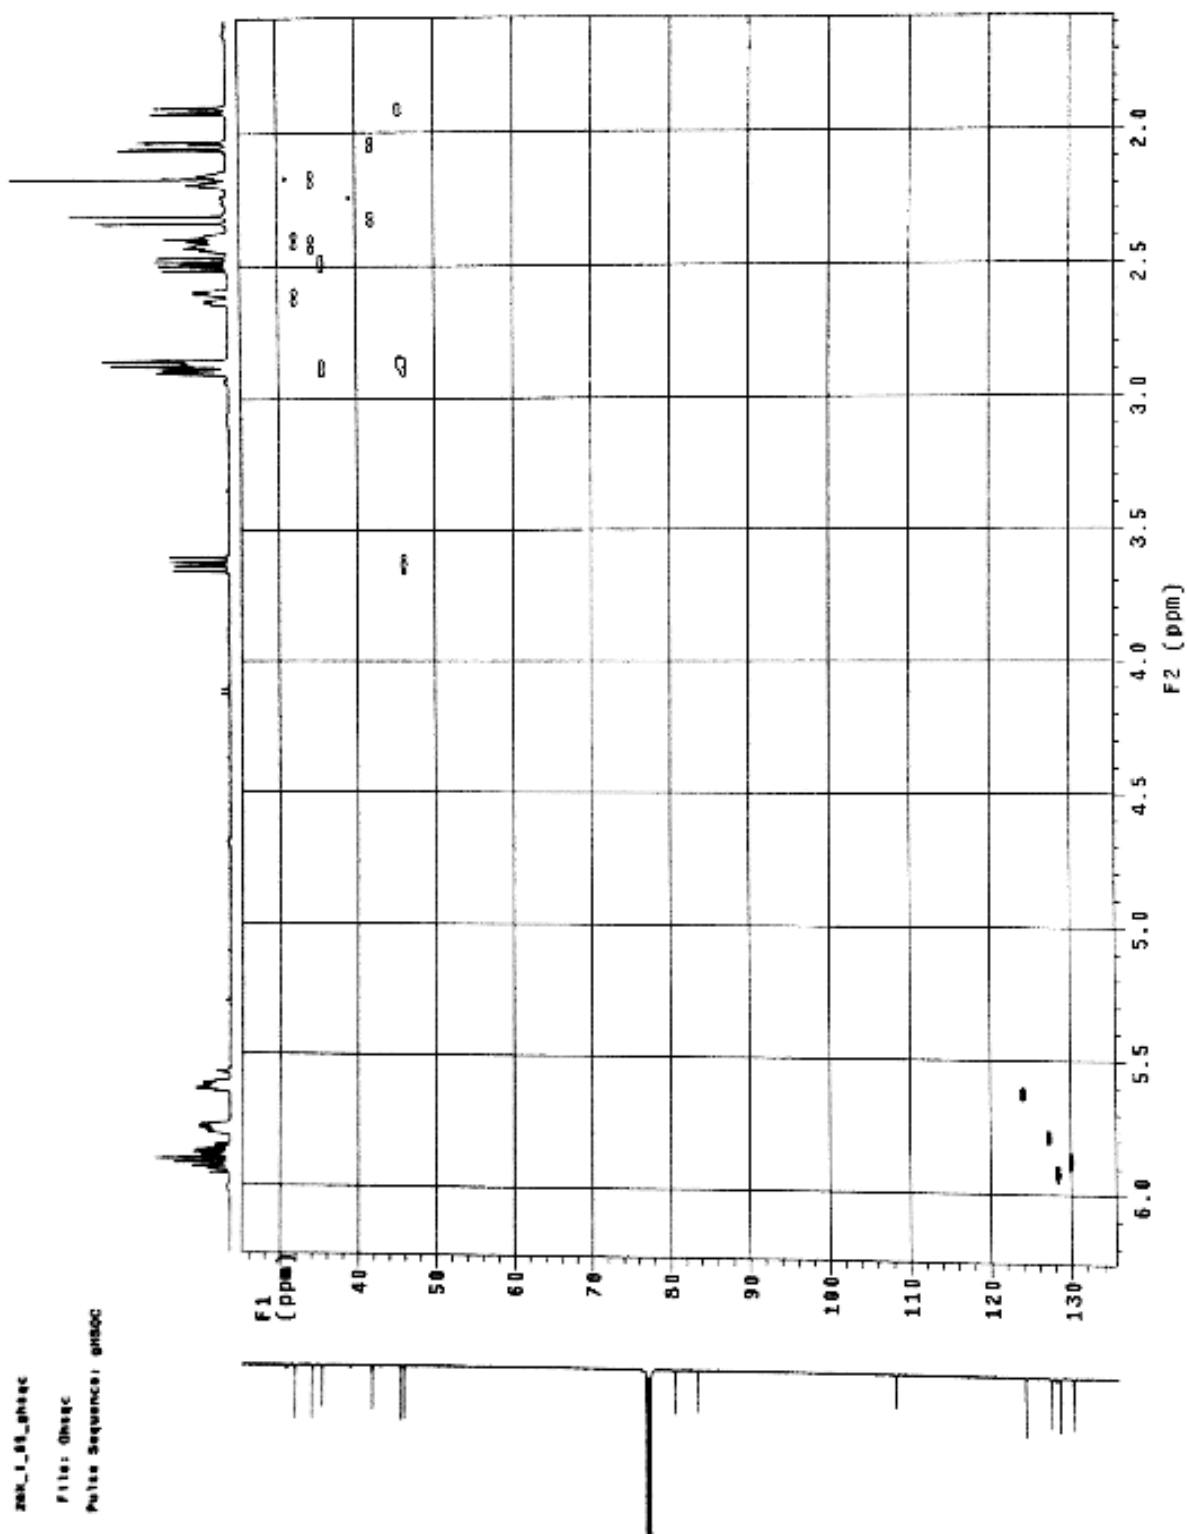

Supplement: c4cc03983a1.pdf [file c4cc03983a1.pdf]
